# Supplementary material for: Synthesis of base-free boriranes and their conversion to borirenes using strong reductant
Source: Royal Society of Chemistry journal article supplement (doi:10.1039/d5dt00069f), 2025-01-01
Supplement: d5dt00069f1.pdf [file d5dt00069f1.pdf]

Supporting Information for

# Synthesis of Base-free Boriranes and their Conversion to Borirenes Using Strong Reductant

Simon Dotzauer,<sup>[a,b]</sup> Sourav Kar,<sup>[a,b]</sup> Theresa Swoboda,<sup>[a,b]</sup> Christoph Weidemann,<sup>[a,b]</sup> Andreas Häfner,<sup>[a,b]</sup> Rian D. Dewhurst,<sup>[a,b]</sup> Holger Braunschweig<sup>\*[a,b]</sup>

---

[a] S. Dotzauer, Dr. S. Kar, T. Swoboda, C. Weidemann, A. Häfner, Dr. R. D. Dewhurst, Prof. Dr. H. Braunschweig

Institute for Inorganic Chemistry, Julius-Maximilians-Universität Würzburg

Am Hubland, 97074 Würzburg, Germany

E-mail: h.braunschweig@uni-wuerzburg.de

[b] S. Dotzauer, Dr. S. Kar, T. Swoboda, C. Weidemann, A. Häfner, Dr. R. D. Dewhurst, Prof. Dr. H. Braunschweig

Institute for Sustainable Chemistry & Catalysis with Boron, Julius-Maximilians-Universität Würzburg

Am Hubland, 97074 Würzburg, Germany

## Table of Contents

|                                              |      |
|----------------------------------------------|------|
| 1. Experimental details .....                | S2   |
| 1.1. Methods and materials.....              | S2   |
| 1.2. Synthetic procedures .....              | S3   |
| 1.3. NMR spectra of isolated compounds ..... | S8   |
| 1.4. X-ray crystallographic data .....       | S355 |
| 2. Computational details.....                | S39  |
| 3. References.....                           | S54  |

# 1. Experimental details

## 1.1. Methods and materials

All manipulations were performed under an atmosphere of dry argon or *in vacuo* using standard Schlenk line or glovebox techniques. Deuterated solvents were dried over molecular sieves and degassed by three freeze-pump-thaw cycles prior to use. All other solvents were distilled and degassed from appropriate drying agents. Both deuterated and non-deuterated solvents were stored under argon over activated 4 Å molecular sieves. NMR spectra of isolated compounds were acquired on a Bruker Avance 500 ( $^1\text{H}$ : 500.1 MHz,  $^{11}\text{B}$ : 160.5 MHz,  $^{13}\text{C}$ : 125.8 MHz,  $^{29}\text{Si}$ : 99.4 MHz) or 600 ( $^1\text{H}$ : 600.2 MHz,  $^{11}\text{B}$ : 150.9 MHz,  $^{13}\text{C}$ : 160.5 MHz,  $^{119}\text{Sn}$ : 223.8 MHz) spectrometer. Routine NMR measurements were performed on a Bruker Avance 400 NMR spectrometer. Chemical shifts ( $\delta$ ) are reported in ppm and internally referenced to the carbon nuclei ( $^{13}\text{C}\{^1\text{H}\}$ ) or residual protons ( $^1\text{H}$ ) of the solvent. Heteronuclei NMR spectra are referenced to external standards ( $^{11}\text{B}$ :  $\text{BF}_3\cdot\text{OEt}_2$ ,  $^{119}\text{Sn}$ :  $\text{SnMe}_4$ ). Resonances are identified as singlet (s), doublet (d), triplet (t), septet (sept), multiplet (m) or broad (br). Coupling constants ( $J$ ) are  $^1\text{H}$ - $^1\text{H}$  coupling constants unless specified otherwise. High-resolution mass spectrometry (HRMS) data were obtained from a Thermo Scientific Exactive Plus spectrometer. Photochemical experiments were performed using a LOT-Quantum Design GmbH mercury-xenon vapor lamp ( $I = 19 \text{ A}$ ,  $U = 26 \text{ V}$ ).

Solvents and reagents were purchased from Sigma-Aldrich, abcr or Alfa Aesar. Compounds **1a**,<sup>37</sup> **1b**,<sup>38</sup> **2**,<sup>39</sup> **6**,<sup>44</sup> and **8**<sup>45</sup> were synthesised according to literature methods.

## 1.2. Synthetic procedures

### Synthesis of 3a

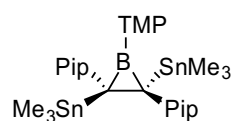

To a solution of **1a** (170 mg, 877  $\mu\text{mol}$ ) in benzene (30 mL), a solution of [TMPB(SnMe<sub>3</sub>)<sub>2</sub>] (**2**, 400 mg, 833  $\mu\text{mol}$ ) in benzene (30 mL) was added and the mixture was stirred at room temperature for five days, resulting in a deep-yellow solution. All volatiles were removed *in vacuo*, and the residue was washed with cold hexane (10 mL) and recrystallised from Et<sub>2</sub>O, yielding **3a** as a colourless solid (530 mg, 790  $\mu\text{mol}$ , 95%). Single crystals suitable for X-ray diffraction analysis were obtained by slow evaporation of a saturated hexane solution at room temperature.

*Note: In addition to borirane 3a, the NMR spectra indicate traces of unidentified side products that could not be separated from the mixture. However, the overall purity is estimated to exceed 95%.*

<sup>1</sup>H{<sup>11</sup>B} NMR (600.2 MHz, C<sub>6</sub>D<sub>6</sub>):  $\delta$  = 0.42 (<sup>3</sup>J<sub>H,Sn</sub> = 47.1 Hz, 18H, SnCH<sub>3</sub>), 1.04 (s, br, 2H, 3,4,5-NC<sub>5</sub>H<sub>10</sub>), 1.32–1.74 (m, 25H, TMP-CH<sub>2</sub>, TMP-CH<sub>3</sub>, 3,4,5-NC<sub>5</sub>H<sub>10</sub>), 1.79 (m, 2H, TMP-CH<sub>2</sub>), 2.49 (m, br, 2H, 2,6-NC<sub>5</sub>H<sub>10</sub>), 2.71 (m, br, 2H, 2,6-NC<sub>5</sub>H<sub>10</sub>), 3.39–3.48 (m, br, 4H, 2,6-NC<sub>5</sub>H<sub>10</sub>) ppm.

<sup>13</sup>C{<sup>1</sup>H} NMR (150.9 MHz, C<sub>6</sub>D<sub>6</sub>):  $\delta$  = -2.7 (br, SnCH<sub>3</sub>), 23.9 (TMP-CH<sub>2</sub>), 26.9 (br, 3,4,5-NC<sub>5</sub>H<sub>10</sub>), 31.2 (TMP-CH<sub>3</sub>), 35.2 (TMP-CH<sub>2</sub>), 36.7 (TMP-CH<sub>2</sub>), 56.4 (TMP-C<sub>q</sub>), 56.6 (br, 2,6-NC<sub>5</sub>H<sub>10</sub>), 59.4 (br, 2,6-NC<sub>5</sub>H<sub>10</sub>), 71.2 (C<sub>q</sub>-B-C<sub>q</sub>) ppm.

<sup>11</sup>B NMR (160.5 MHz, C<sub>6</sub>D<sub>6</sub>):  $\delta$  = 35.2 ppm.

<sup>119</sup>Sn NMR (223.8 MHz, C<sub>6</sub>D<sub>6</sub>):  $\delta$  = -58.6 ppm.

HRMS LIFDI for [C<sub>24</sub>H<sub>47</sub>BN<sub>3</sub>Sn]<sup>+</sup> = [M]<sup>+</sup>: *m/z*: calcd. 508.2880; found 508.2864.

### Synthesis of 3b

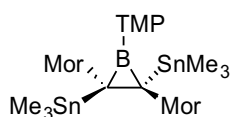

To a solution of **1b** (74.0 mg, 386  $\mu\text{mol}$ ) in benzene (30 mL), a solution of [TMPB(SnMe<sub>3</sub>)<sub>2</sub>] (**2**, 185 mg, 386  $\mu\text{mol}$ ) in benzene (30 mL) was added and the mixture was stirred at room temperature for five days, resulting in a deep-yellow solution. All volatiles were removed *in vacuo*, and the residue was washed with cold hexane (10 mL) and recrystallised from THF, yielding **3b** as a colourless solid (253 mg, 374  $\mu\text{mol}$ , 97%). Single crystals suitable for X-ray diffraction analysis were obtained by slow evaporation of a saturated Et<sub>2</sub>O solution at room temperature.

**$^1\text{H}\{^{11}\text{B}\}$  NMR** (600.2 MHz,  $\text{C}_6\text{D}_6$ ):  $\delta = 0.31$  ( $^3J_{\text{H},\text{Sn}} = 47.1$  Hz, 18H,  $\text{SnCH}_3$ ), 1.19–1.23 (m, 2H,  $\text{TMP-CH}_2$ ), 1.25 (s, 6H,  $\text{TMP-CH}_3$ ), 1.41–1.54 (m, 8H,  $\text{TMP-CH}_3$ ,  $\text{TMP-CH}_2$ ), 1.72–1.76 (m, 2H,  $\text{TMP-CH}_2$ ), 2.54–3.23 (br, 8H,  $\text{NC}_4\text{H}_8\text{O}$ ), 3.31–3.95 (br, 8H, 2H,  $\text{NC}_4\text{H}_8\text{O}$ ) ppm.

**$^{13}\text{C}\{^1\text{H}\}$  NMR** (150.9 MHz,  $\text{C}_6\text{D}_6$ ):  $\delta = -2.3$  (s, br,  $\text{SnCH}_3$ ), 31.7 ( $\text{TMP-CH}_2$ ), 35.2 ( $\text{TMP-CH}_3$ ), 35.9 ( $\text{TMP-CH}_2$ ), 56.0 (br,  $\text{NC}_4\text{H}_8\text{O}$ ), 56.7 ( $\text{TMP-C}_q$ ), 58.9 ( $\text{NC}_4\text{H}_8\text{O}$ ), 70.4 ( $\text{C}_q\text{-B-C}_q$ ) ppm.

**$^{11}\text{B}$  NMR** (160.5 MHz,  $\text{C}_6\text{D}_6$ ):  $\delta = 34.9$  ppm.

**$^{119}\text{Sn}$  NMR** (223.8 MHz,  $\text{C}_6\text{D}_6$ ):  $\delta = -57.9$  ppm.

**HRMS LIFDI** for  $[\text{C}_{22}\text{H}_{43}\text{BN}_3\text{O}_2\text{Sn}]^+ = [\text{M}]^+$ :  $m/z$ : calcd. 512.2465; found 512.2459.

### Synthesis of 4a

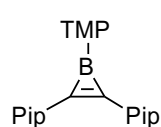

To a dispersion of  $\text{KC}_8$  (161 mg, 1.19 mmol) in benzene (5 mL), a solution of **3a** (200 mg, 298  $\mu\text{mol}$ ) in benzene (5 mL) was added and the mixture was stirred at room temperature for 16 h. The solution was filtered over Celite, and all volatiles were removed *in vacuo*. The residue was extracted with hexane (2 x 2 mL) yielding **4a** as a solid (13 mg, 38.7  $\mu\text{mol}$ , 13%). Single crystals suitable for X-ray diffraction analysis were obtained by slow evaporation of a saturated hexane solution at room temperature.

*Note: Instead of  $\text{KC}_8$ , lithium naphthalene in THF can be used as a reducing reagent, reducing the reaction time to 1 h. The NMR spectrum shows residual naphthalene from the reaction and unidentified organotin species as side products.*

**$^1\text{H}\{^{11}\text{B}\}$  NMR** (500.1 MHz,  $\text{C}_6\text{D}_6$ ):  $\delta = 1.31$ –1.36 (m, 4H,  $\text{TMP-CH}_2$ ), 1.46–1.53 (m, 24H,  $\text{TMP-CH}_3$ , 3,4,5- $\text{NC}_5\text{H}_{10}$ ), 1.58–1.63 (m, 2H,  $\text{TMP-CH}_2$ ), 3.27 (m, 8H, 2,6- $\text{NC}_5\text{H}_{10}$ ) ppm.

**$^{13}\text{C}\{^1\text{H}\}$  NMR** (125.8 MHz,  $\text{C}_6\text{D}_6$ ):  $\delta = 17.6$  ( $\text{TMP-CH}_2$ ), 24.8 (3,4,5- $\text{NC}_5\text{H}_{10}$ ), 26.8 (3,4,5- $\text{NC}_5\text{H}_{10}$ ), 33.0 ( $\text{TMP-CH}_3$ ), 40.0 ( $\text{TMP-CH}_2$ ), 52.2 ( $\text{TMP-C}_q$ ), 52.9 (2,6- $\text{NC}_5\text{H}_{10}$ ), 134.9 ( $\text{C}_q\text{-B-C}_q$ ) ppm.

**$^{11}\text{B}$  NMR** (160.5 MHz,  $\text{C}_6\text{D}_6$ ):  $\delta = 11.9$  ppm.

**HRMS LIFDI** for  $[\text{C}_{21}\text{H}_{38}\text{BN}_3]^+ = [\text{M}]^+$ :  $m/z$ : calcd. 343.3153; found 343.3146.

### Synthesis of 4b

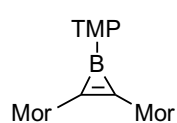

To a dispersion of  $\text{KC}_8$  (161 mg, 1.19 mmol) in benzene (30 mL), a solution of **3b** (200 mg, 298  $\mu\text{mol}$ ) in benzene (30 mL) was added and the mixture was stirred at room temperature for 16 h. The solution was filtered over Celite, and all volatiles were removed *in vacuo*. The residue was extracted with hexane (10 mL) yielding



**4b** as a colourless solid (18.0 mg, 51.8  $\mu\text{mol}$ , 17%). Single crystals suitable for X-ray diffraction analysis were obtained by slow evaporation of a saturated hexane solution at room temperature.

$^1\text{H}\{^{11}\text{B}\}$  NMR (500.1 MHz,  $\text{C}_6\text{D}_6$ ):  $\delta = 1.41$  (s, 12H, TMP- $\text{CH}_3$ ), 1.47–1.50 (m, 4H, TMP- $\text{CH}_2$ ), 1.55 – 1.60 (m, 2H, TMP- $\text{CH}_2$ ), 3.13 (m, 8H,  $\text{NC}_4\text{H}_8\text{O}$ ), 3.51 (m, 8H,  $\text{NC}_4\text{H}_8\text{O}$ ) ppm.

$^{13}\text{C}\{^1\text{H}\}$  NMR (125.8 MHz,  $\text{C}_6\text{D}_6$ ):  $\delta = 17.0$  (TMP- $\text{CH}_2$ ), 32.6 (TMP- $\text{CH}_3$ ), 39.4 (TMP- $\text{CH}_2$ ), 51.9 (TMP- $\text{C}_q$ ), 51.9 ( $\text{NC}_4\text{H}_8\text{O}$ ), 66.9 ( $\text{NC}_4\text{H}_8\text{O}$ ), 134.2 ( $\text{C}_q\text{-B-C}_q$ ) ppm.

$^{11}\text{B}$  NMR (160.5 MHz,  $\text{C}_6\text{D}_6$ ):  $\delta = 12.4$  ppm.

HRMS LIFDI for  $[\text{C}_{19}\text{H}_{34}\text{BN}_3\text{O}_2]^+ = [\text{M}]^+$ :  $m/z$ : calcd. 347.2739; found 347.2730.

### Reactivity towards Lewis Bases

To a solution of borirane (**3a** or **3b**) (50.0  $\mu\text{mol}$ ) or borirene (**4a** or **4b**) (50.0  $\mu\text{mol}$ ) in benzene, an excess amount of Lewis base (DMAP,  $\text{PMe}_3$  or  $\text{IMe}$ ) in benzene was added. These reactions were stirred at room temperature and studied via NMR spectroscopy. In all cases, no reaction was observed.

### Synthesis of **5a**

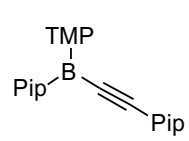 A solution of **4a** (10.0 mg, 34.2  $\mu\text{mol}$ ) in benzene (1 mL) was irradiated with UV light for 24 h at room temperature. All volatiles were removed *in vacuo* and the residue was extracted with hexane (2 mL) yielding **5a** as a colourless solid (10 mg, 34.2  $\mu\text{mol}$ , 95%). Single crystals suitable for X-ray diffraction analysis were obtained by slow evaporation of a saturated hexane solution at room temperature.

*Note: In addition to alkyne 5a, the NMR spectra indicate traces of unidentified side products that could not be separated from the mixture. However, the overall purity is estimated to exceed 90%.*

$^1\text{H}\{^{11}\text{B}\}$  NMR (600.2 MHz,  $\text{C}_6\text{D}_6$ ):  $\delta = 1.04\text{--}1.07$  (m, 2H, 3,4,5- $\text{NC}_5\text{H}_{10}$ ), 1.21–1.25 (m, 4H, 3,4,5- $\text{NC}_5\text{H}_{10}$ ), 1.27–1.71 (m, 23H, TMP- $\text{CH}_3$ , TMP- $\text{CH}_2$ , 3,4,5- $\text{NC}_5\text{H}_{10}$ ), 1.96 (br, 1H, TMP- $\text{CH}_2$ ), 2.89 (m, 4H, 2,6- $\text{NC}_5\text{H}_{10}$ ), 3.37–3.81 (br, 4H, 2,6- $\text{NC}_5\text{H}_{10}$ ) ppm.

$^{13}\text{C}\{^1\text{H}\}$  NMR (150.9 MHz,  $\text{C}_6\text{D}_6$ ):  $\delta = 19.4$  (TMP- $\text{CH}_2$ ), 23.8 (3,4,5- $\text{NC}_5\text{H}_{10}$ ), 25.3 (3,4,5- $\text{NC}_5\text{H}_{10}$ ), 26.2 (br, 3,4,5- $\text{NC}_5\text{H}_{10}$ ), 27.3 (br, 3,4,5- $\text{NC}_5\text{H}_{10}$ ), 28.2 (br, 3,4,5- $\text{NC}_5\text{H}_{10}$ ), 34.5 (br, TMP- $\text{CH}_3$ ), 41.7 (TMP- $\text{CH}_2$ ), 46.7 (br, 2,6- $\text{NC}_5\text{H}_{10}$ ), 49.2 (br, 2,6- $\text{NC}_5\text{H}_{10}$ ), 51.6 (TMP- $\text{C}_q$ ), 52.9 (2,6- $\text{NC}_5\text{H}_{10}$ ), 71.4 (B-CC), 115.2 (N-CC) ppm.

**<sup>11</sup>B NMR** (192.6 MHz, C<sub>6</sub>D<sub>6</sub>):  $\delta = 28.4$  ppm.

**HRMS** ESI for [C<sub>21</sub>H<sub>38</sub>BN<sub>3</sub>] + H<sup>+</sup> = [M+H]<sup>+</sup>:  $m/z$ : calcd. 344.3232; found 344.3222.

### Synthesis of 7

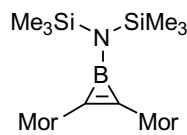 To a solution of **1b** (4.6 mg, 250  $\mu$ mol) in benzene (1 mL), a solution of [(OC)<sub>5</sub>CrBN(SiMe<sub>3</sub>)<sub>2</sub>] (**6**, 36.2 mg, 100  $\mu$ mol) in benzene (1 mL) was added and the mixture was stirred at room temperature for 2 h. The solution was filtered over Celite, and all volatiles were removed *in vacuo*. The residue was extracted with Et<sub>2</sub>O (5 mL) yielding a yellow solid. Single crystals suitable for X-ray diffraction analysis were obtained by slow evaporation of a saturated hexane solution at room temperature.

*Note: In addition to borirene 7, the NMR spectra indicate the presence of unidentified side products that could not be separated from the mixture.*

**<sup>1</sup>H{<sup>11</sup>B} NMR** (500.1 MHz, C<sub>6</sub>D<sub>6</sub>):  $\delta = 0.31$  (s, 18H, Si(CH<sub>3</sub>)<sub>3</sub>), 3.05–3.07 (m, 8H, NC<sub>4</sub>H<sub>8</sub>O), 3.49–3.51 (m, 8H, NC<sub>4</sub>H<sub>8</sub>O) ppm.

**<sup>13</sup>C{<sup>1</sup>H} NMR** (150.9 MHz, C<sub>6</sub>D<sub>6</sub>):  $\delta = 3.4$  (CH<sub>3</sub>, Si(CH<sub>3</sub>)<sub>3</sub>), 52.5 (CH<sub>2</sub>, NC<sub>4</sub>H<sub>8</sub>O), 67.0 (CH<sub>2</sub>, NC<sub>4</sub>H<sub>8</sub>O), 135.1 (C<sub>q</sub>–B–C<sub>q</sub>) ppm.

**<sup>11</sup>B NMR** (160.5 MHz, C<sub>6</sub>D<sub>6</sub>):  $\delta = 14.6$  ppm.

**<sup>29</sup>Si{<sup>1</sup>H}-NMR** (99.4 MHz, C<sub>6</sub>D<sub>6</sub>):  $\delta = 4.43$  (s) ppm.

**HRMS** ESI for [C<sub>19</sub>H<sub>34</sub>BN<sub>3</sub>O<sub>2</sub>] + H<sup>+</sup> = [M+H]<sup>+</sup>:  $m/z$ : calcd. 367.2277; found 367.2269.

### Synthesis of 9

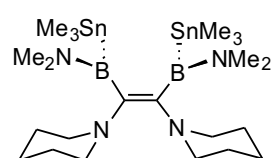 To a solution of **1a** (35.2 mg, 183  $\mu$ mol) in benzene (5 mL), a solution of [B(NMe<sub>2</sub>)(SnMe<sub>3</sub>)<sub>2</sub>] (**8**, 80 mg, 183  $\mu$ mol) in benzene (5 mL) was added and the mixture was stirred at room temperature for two days, resulting in a deep-yellow solution. All volatiles were removed *in vacuo*, and the oily residue was washed with cold pentane (1 mL) and recrystallised from benzene, yielding **9** as a light yellow solid (63.3 mg, 101  $\mu$ mol, 55%). Single crystals suitable for X-ray diffraction analysis were obtained by slow evaporation of a saturated benzene solution at room temperature.

*Note: NMR resonances of 9 were assigned based on its HSQC spectrum. The signals for the C<sub>q</sub> atoms could not be identified.*

**$^1\text{H}\{^{11}\text{B}\}$  NMR** (600.2 MHz,  $\text{C}_6\text{D}_6$ ):  $\delta = 0.31$  (s,  $^3J_{\text{H},\text{Sn}} = 41.3$  Hz, 18H,  $\text{SnCH}_3$ ), 1.42–1.46 (m, 4H, 3,4,5- $\text{NC}_5\text{H}_{10}$ ), 1.54–1.58 (m, 8H, 3,4,5- $\text{NC}_5\text{H}_{10}$ ), 2.73 (s, 12H,  $\text{NCH}_3$ ), 3.17 (s, br, 8H, 3,4,5- $\text{NC}_5\text{H}_{10}$ ).

**$^{13}\text{C}\{^1\text{H} \ ^{11}\text{B}\}$  NMR** (150.9 MHz,  $\text{C}_6\text{D}_6$ ):  $\delta = -8.9$  ( $\text{SnCH}_3$ ), 25.6 (3,4,5- $\text{NC}_5\text{H}_{10}$ ), 27.6 (3,4,5- $\text{NC}_5\text{H}_{10}$ ), 43.2 ( $\text{NCH}_3$ ) 50.7 (3,4,5- $\text{NC}_5\text{H}_{10}$ ) ppm.

**$^{11}\text{B}$  NMR** (160.5 MHz,  $\text{C}_6\text{D}_6$ ):  $\delta = 51.6$  ppm.

**$^{119}\text{Sn}$  NMR** (223.8 MHz,  $\text{C}_6\text{D}_6$ ):  $\delta = -103.6$  ppm.

**HRMS** LIFDI for  $[\text{C}_{19}\text{H}_{41}\text{B}_2\text{N}_4\text{Sn}]^+ = [\text{M}-\text{SnMe}_3]^+$ :  $m/z$ : calcd. 467.2539; found 467.2537.

### 1.3. NMR spectra of isolated compounds

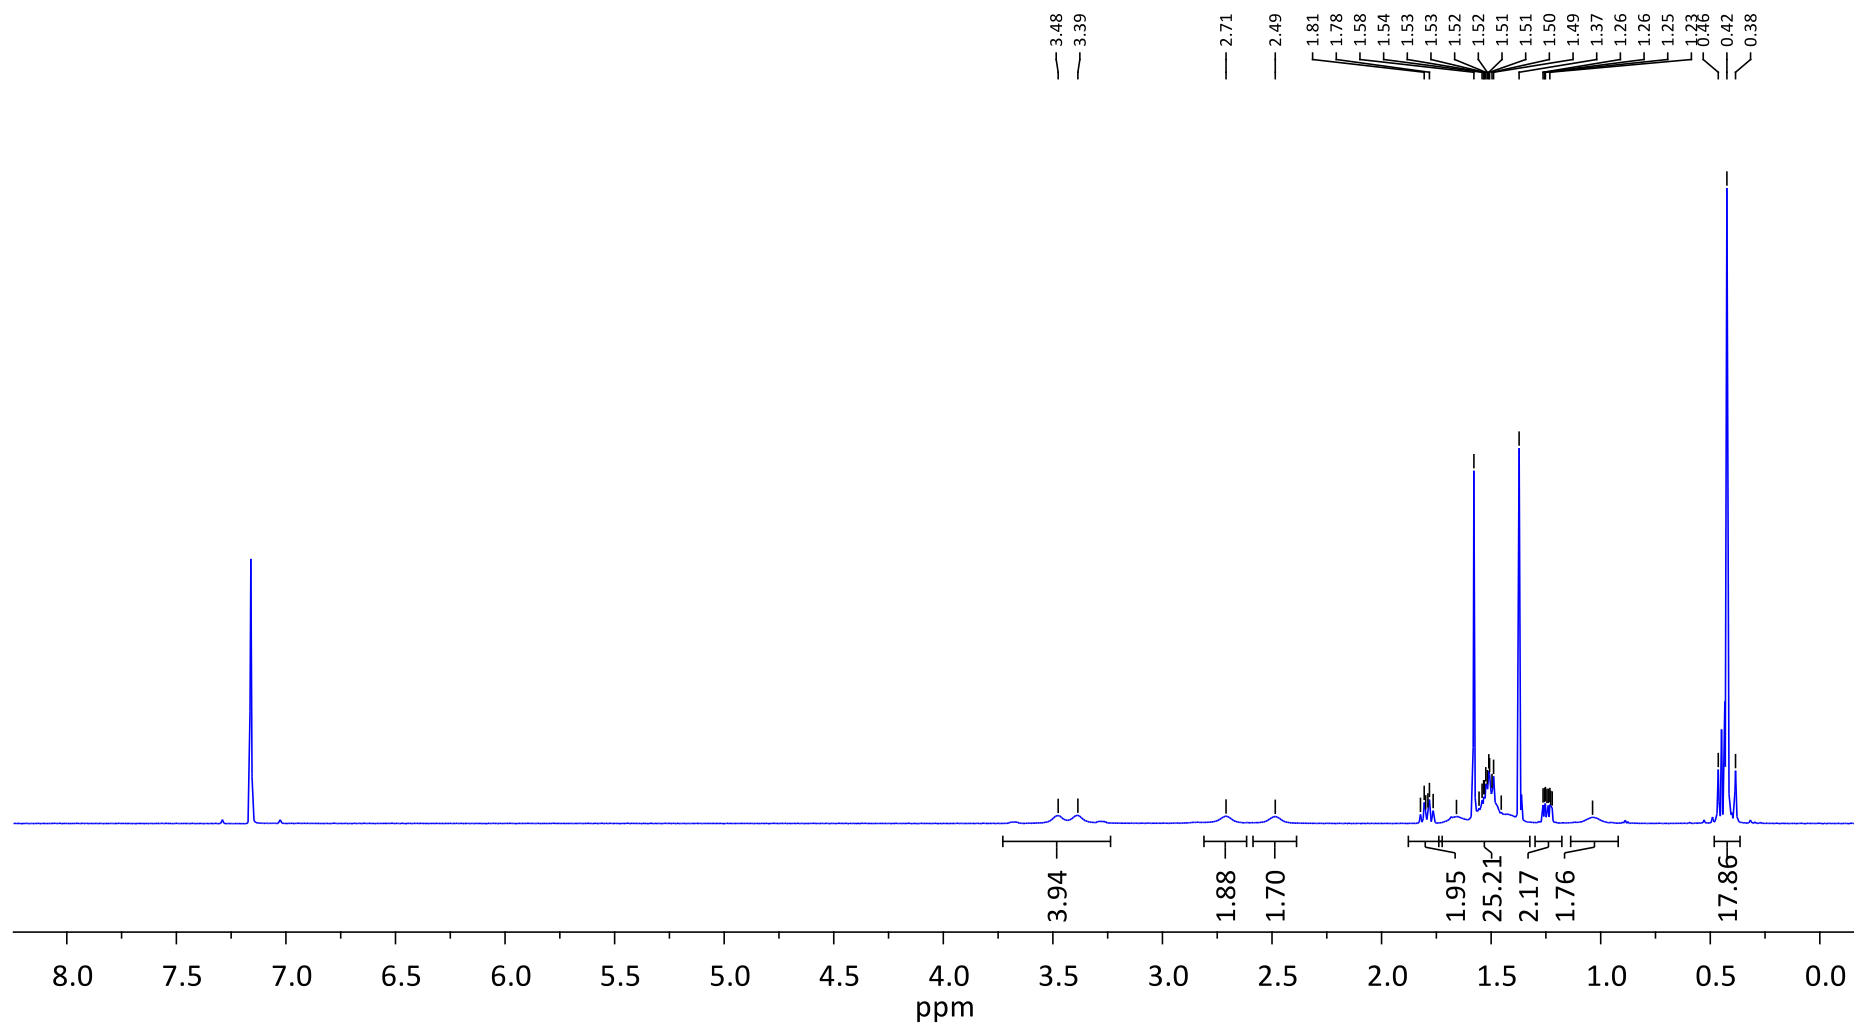

**Fig. S1**  $^1\text{H}\{^{11}\text{B}\}$  NMR spectrum of **3a** in  $\text{C}_6\text{D}_6$ .

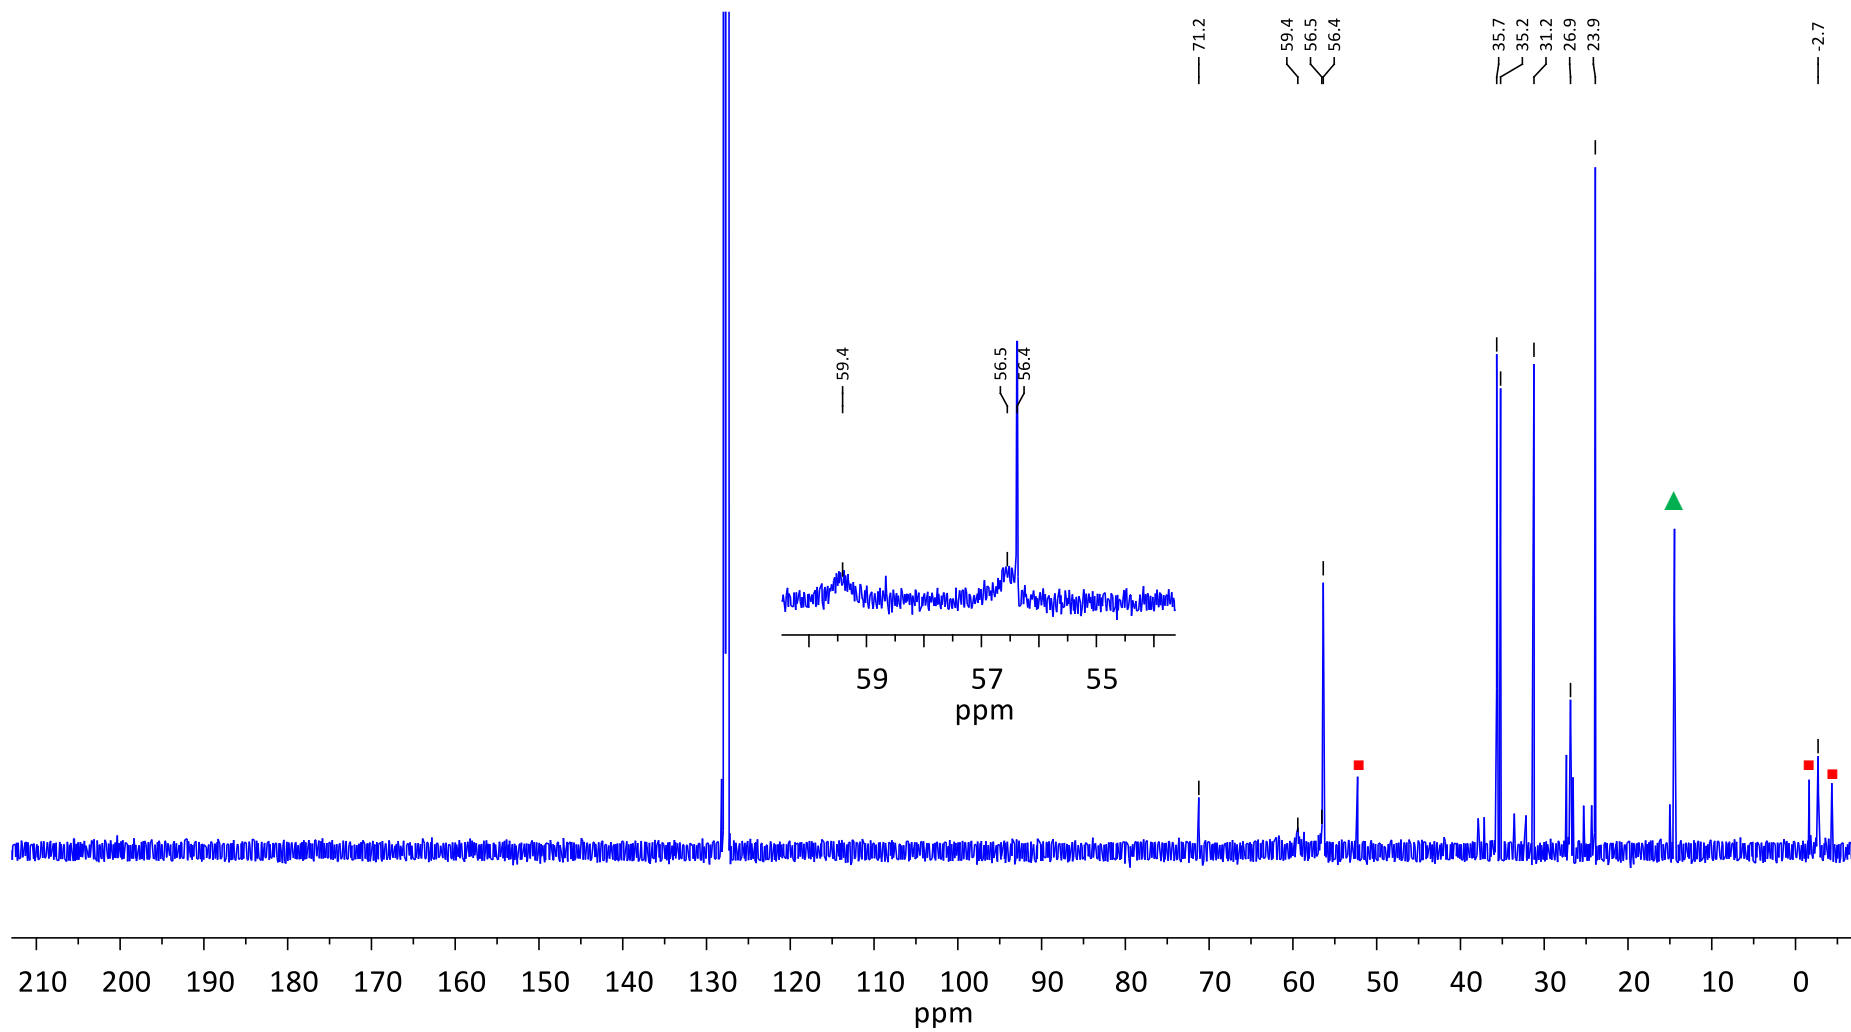

**Fig. S2**  $^{13}\text{C}\{^1\text{H}, ^{11}\text{B}\}$  NMR spectrum of **3a** in  $\text{C}_6\text{D}_6$ .  $\blacktriangle$  = hexane,  $\blacksquare$  = unknown side product.

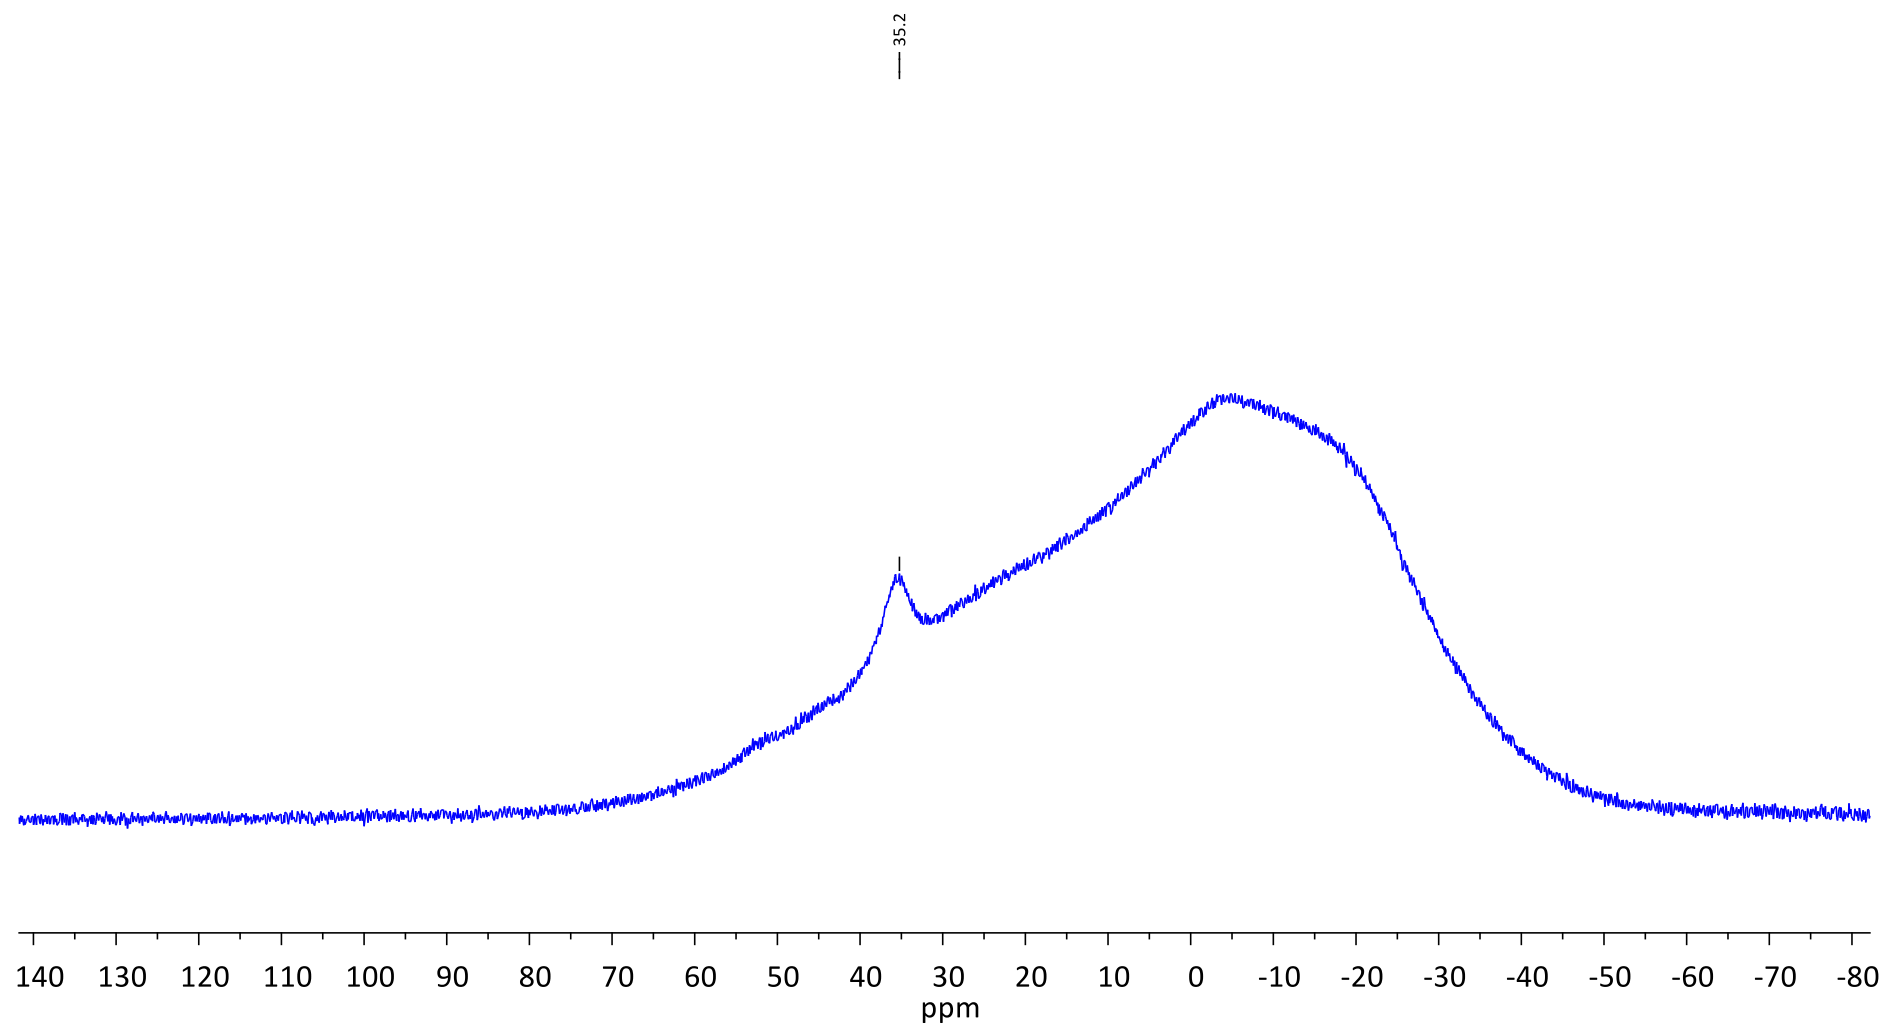

**Fig. S3**  $^{11}\text{B}$  NMR spectrum of **3a** in  $\text{C}_6\text{D}_6$ .

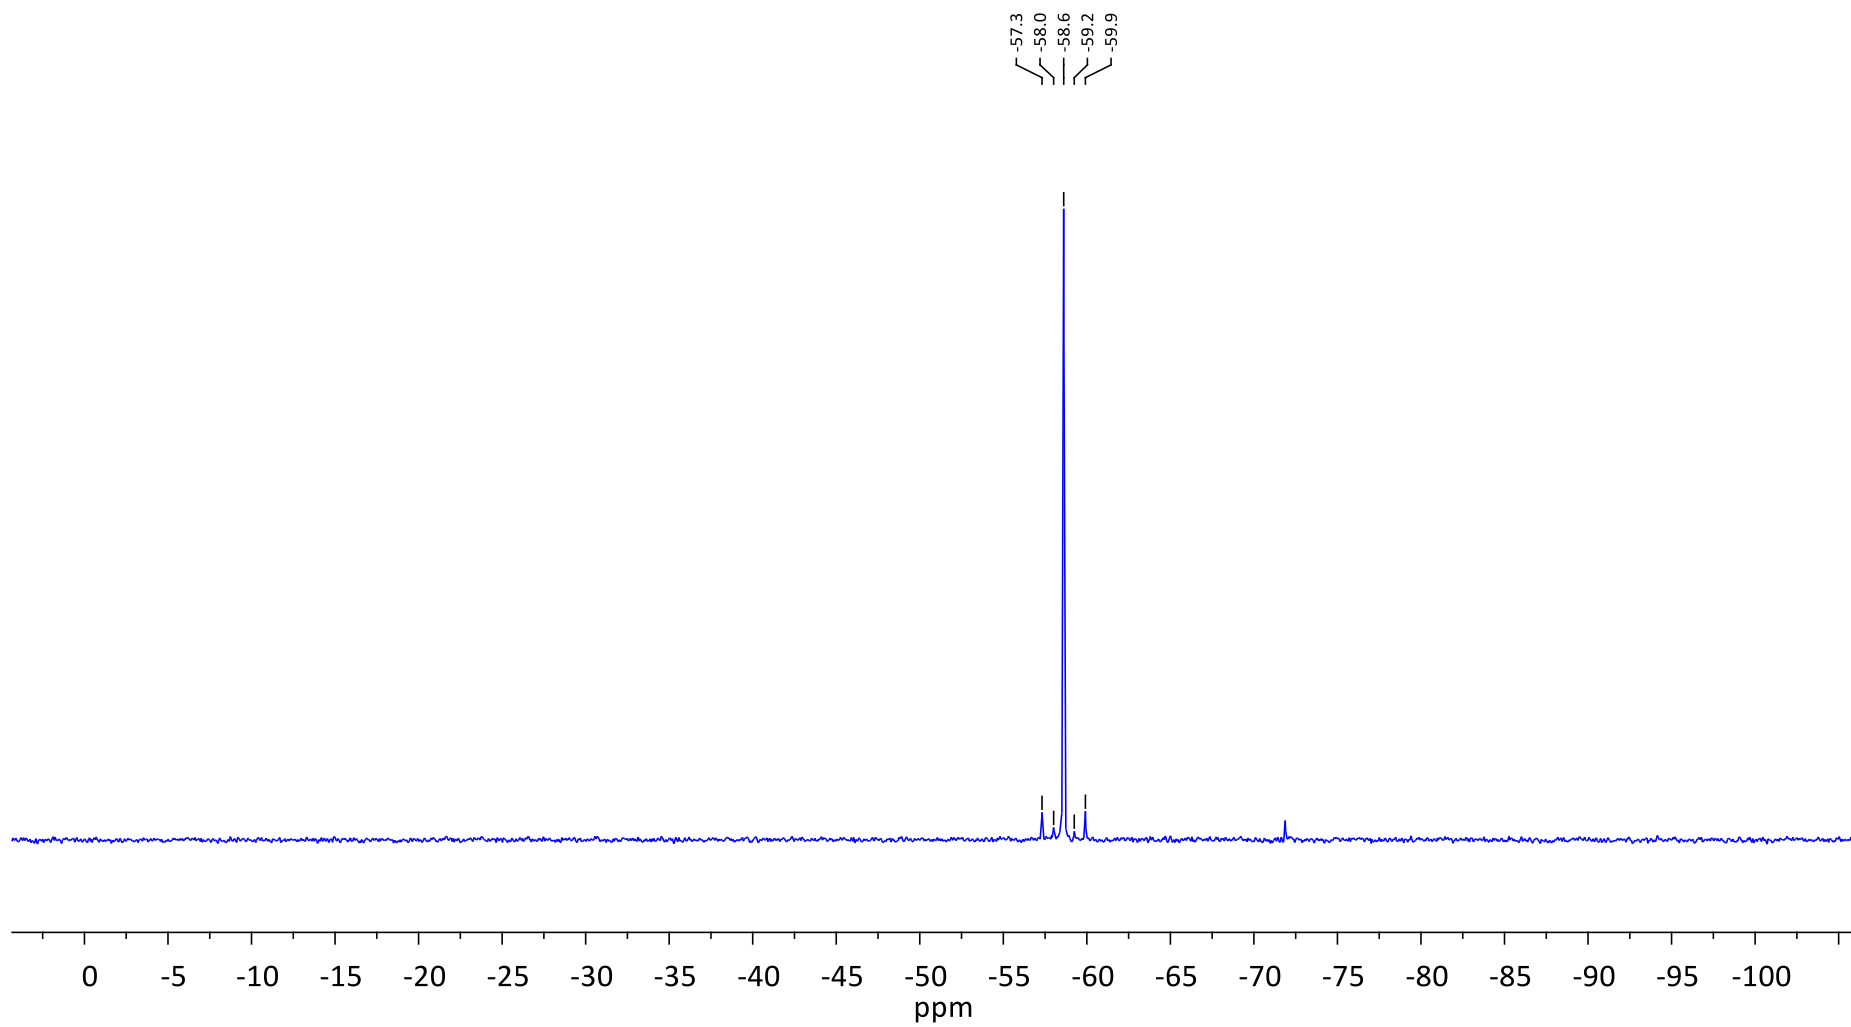

**Fig. S4**  $^{119}\text{Sn}$  NMR spectrum of **3a** in  $\text{C}_6\text{D}_6$ .

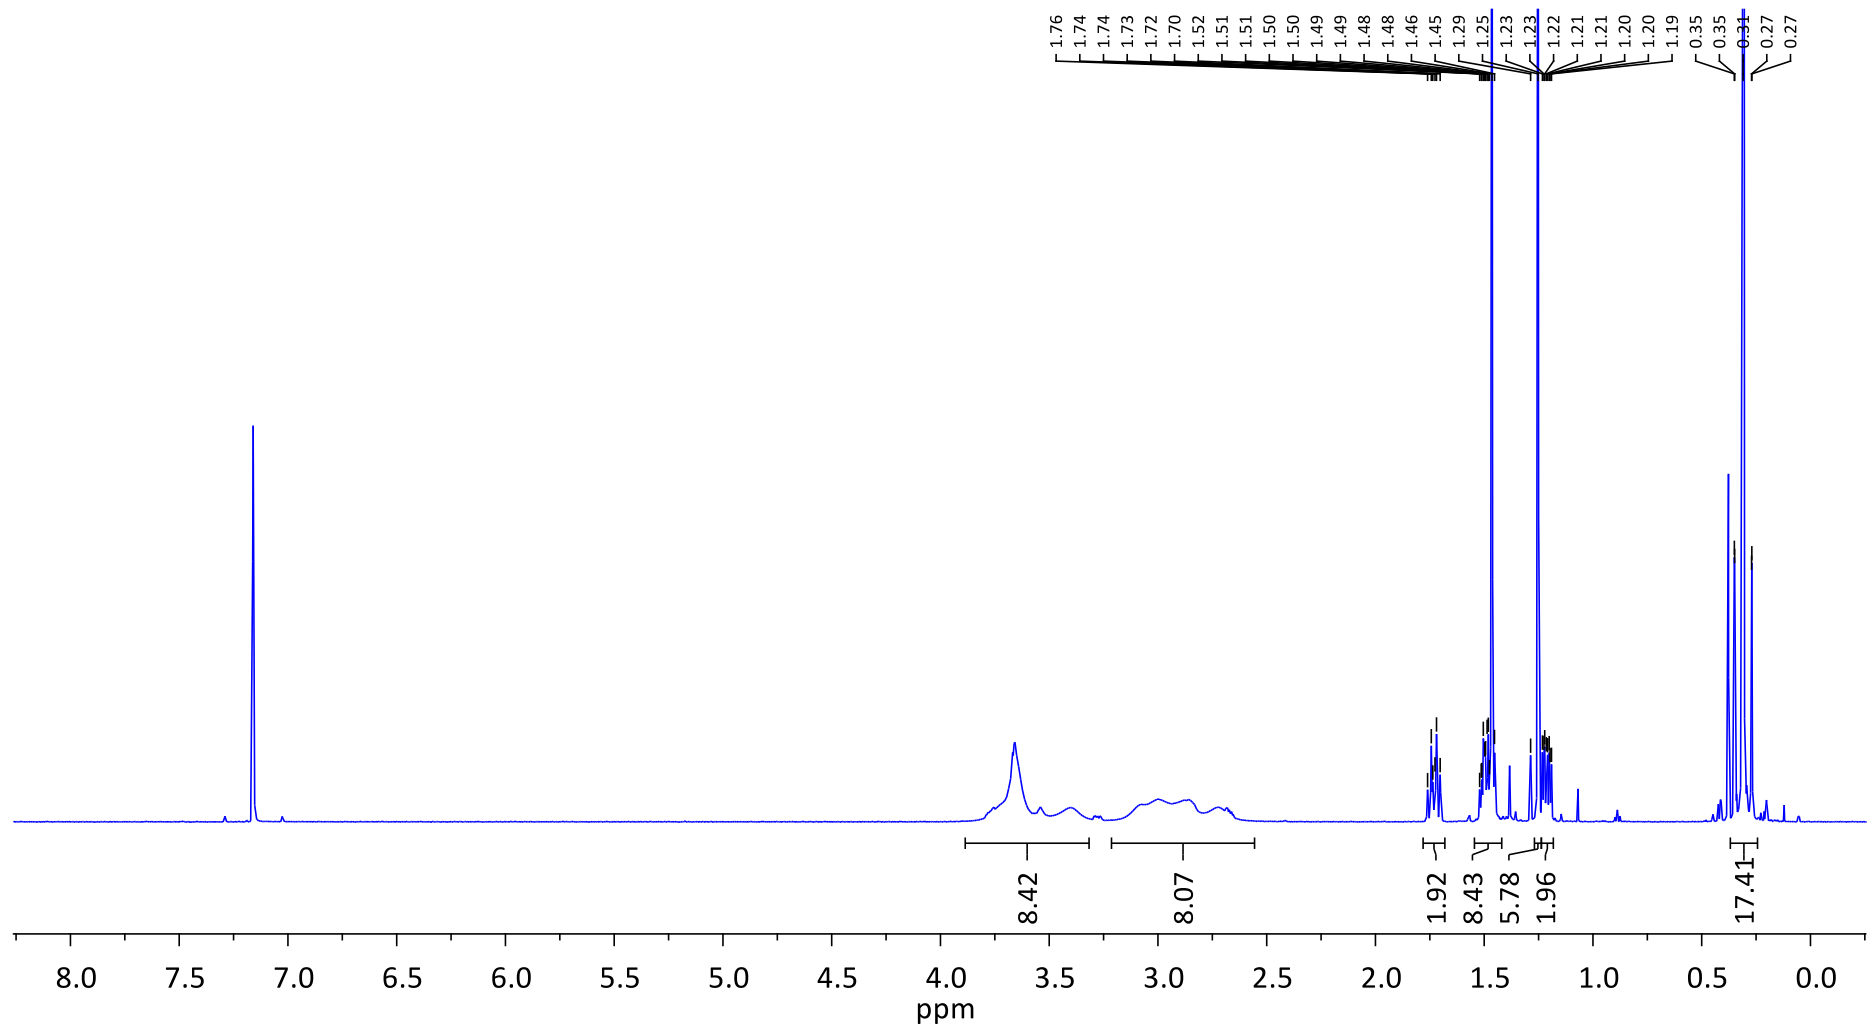

**Fig. S5**  $^1\text{H}\{^{11}\text{B}\}$  NMR spectrum of **3b** in  $\text{C}_6\text{D}_6$ .



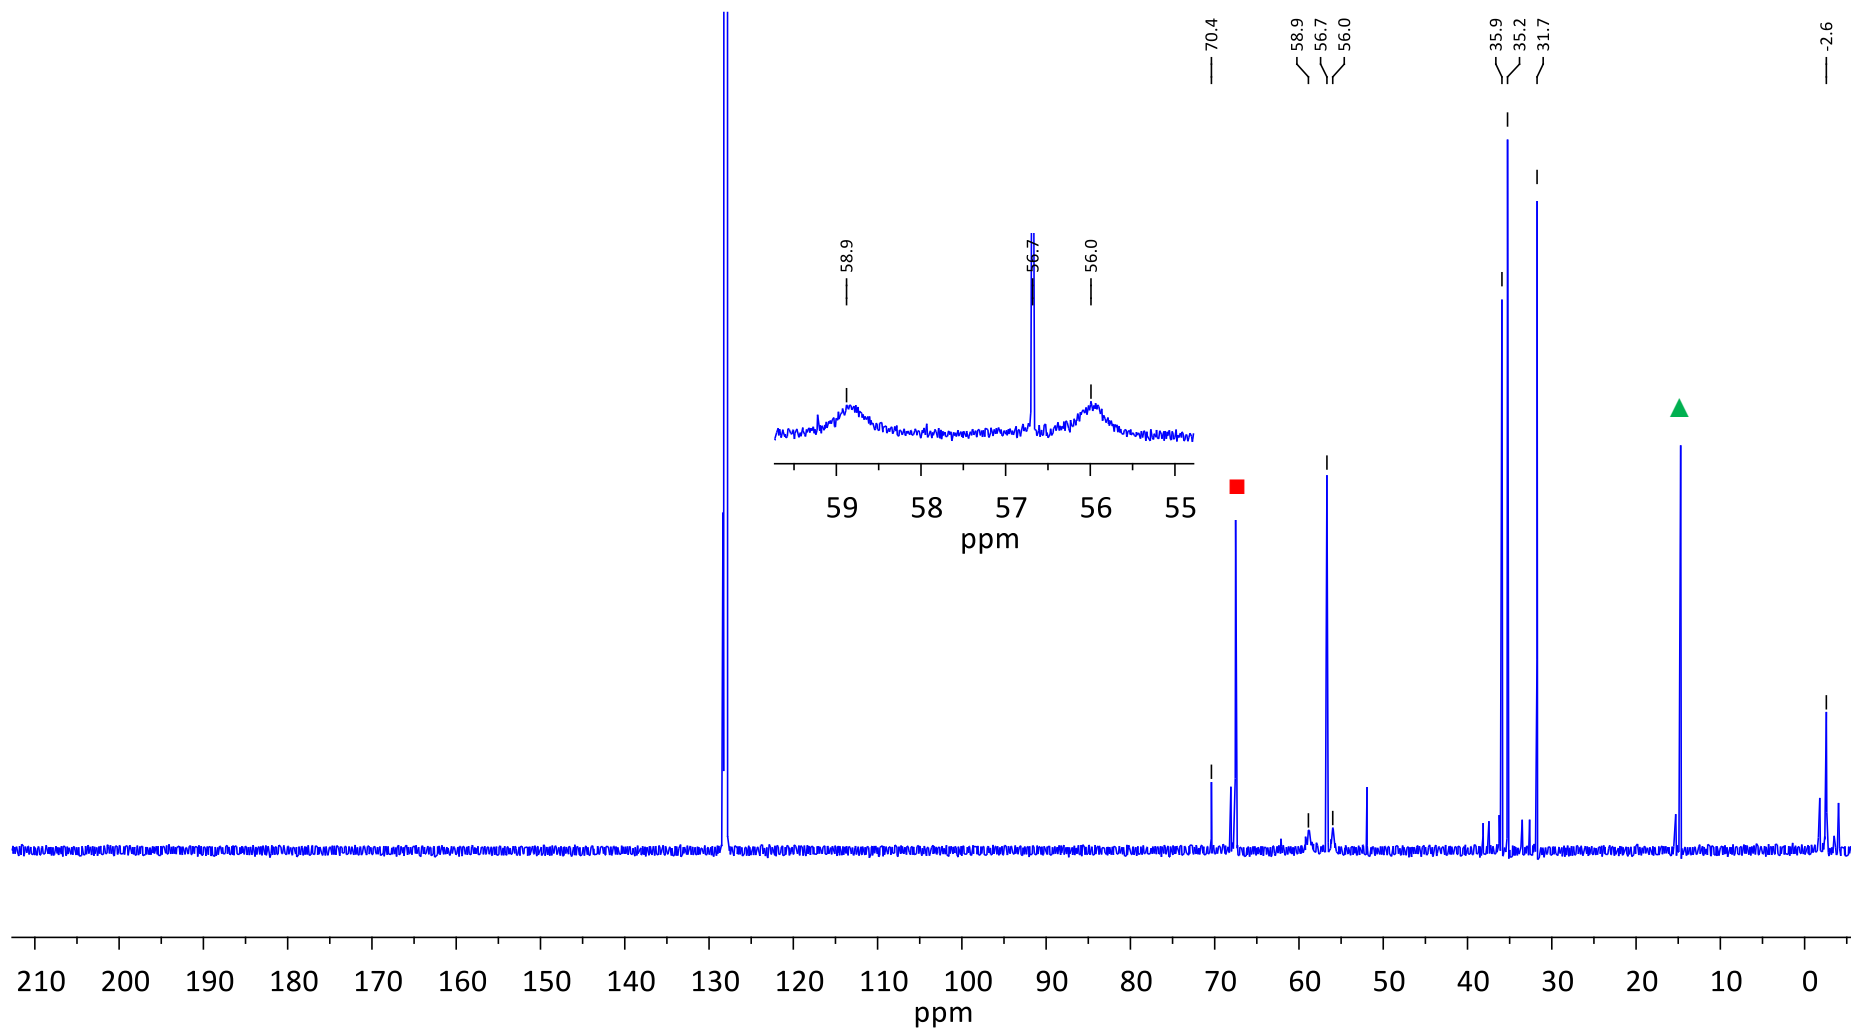

**Fig. S6**  $^{13}\text{C}\{^1\text{H}\}$  NMR spectrum of **3b** in  $\text{C}_6\text{D}_6$ .  $\blacktriangle$  = hexane,  $\blacksquare$  = thf.

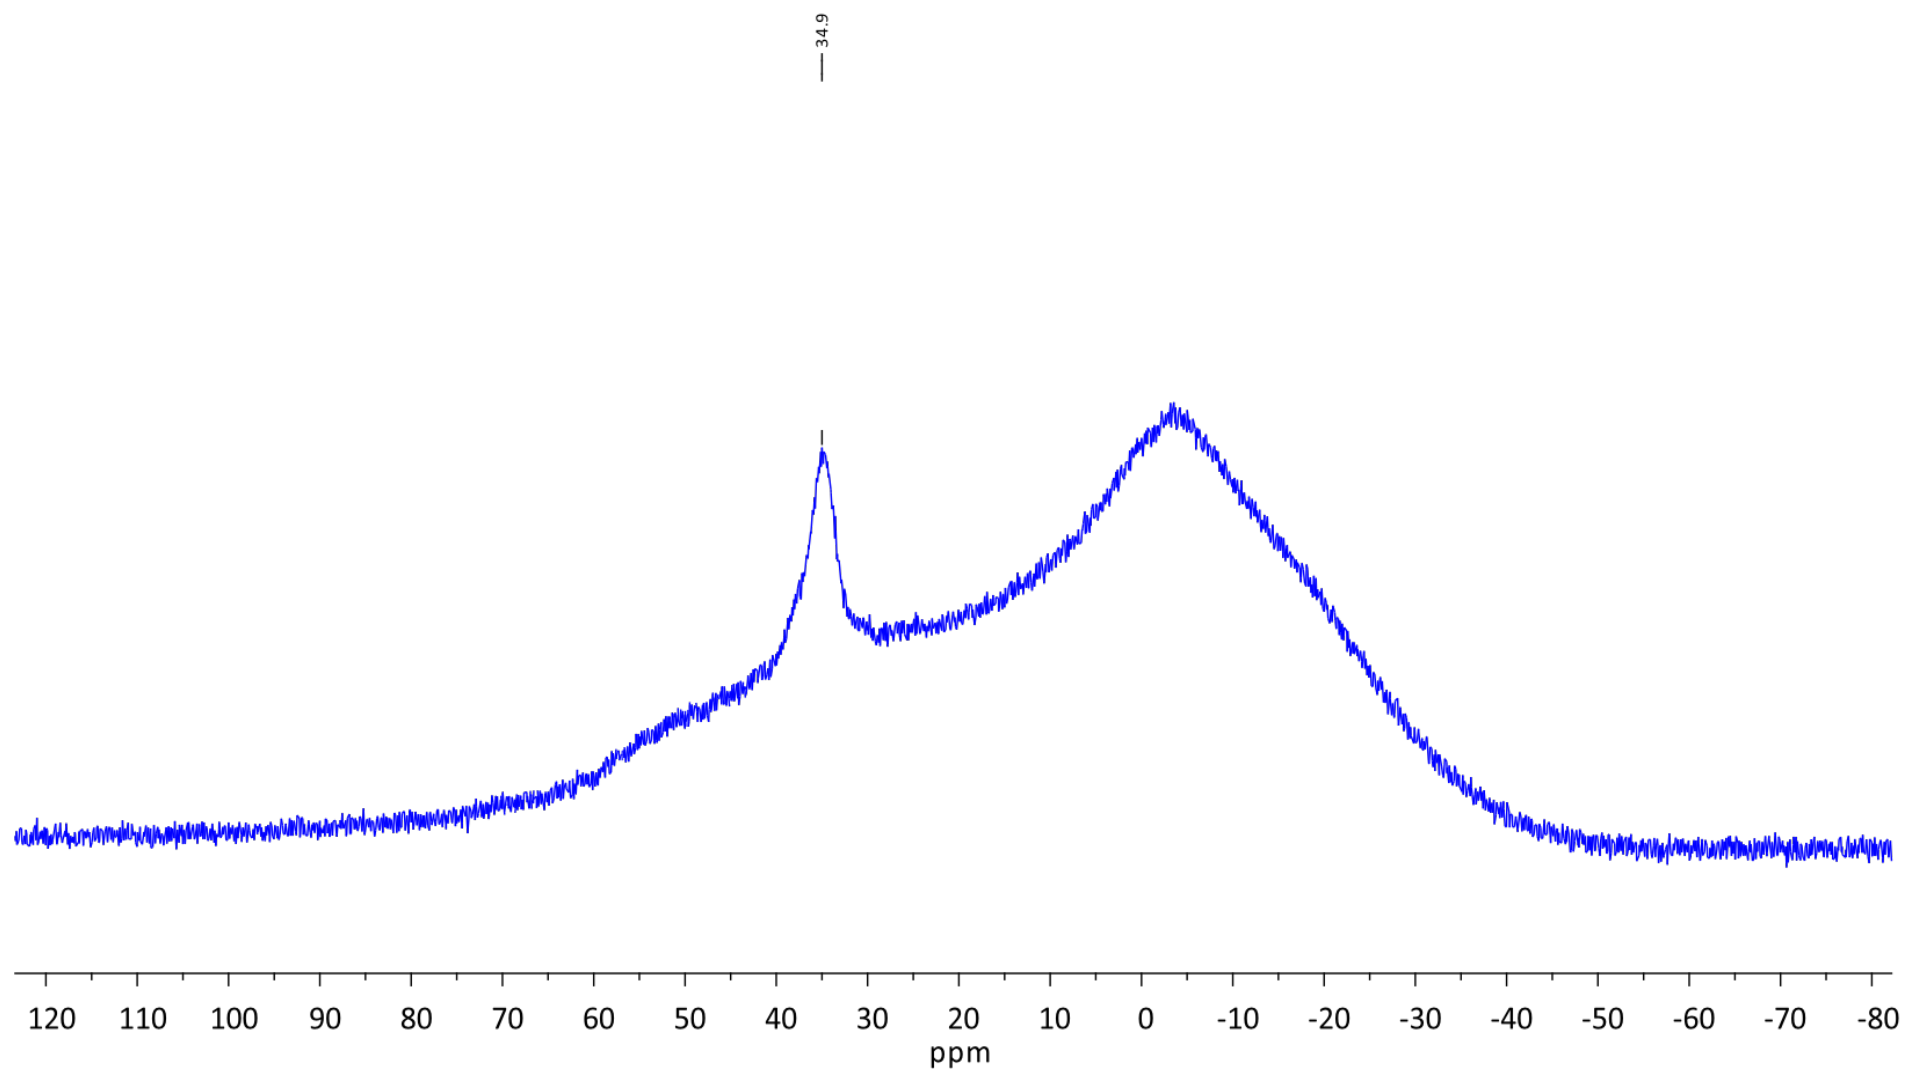

**Fig. S7**  $^{11}\text{B}$  NMR spectrum of **3b** in  $\text{C}_6\text{D}_6$ .

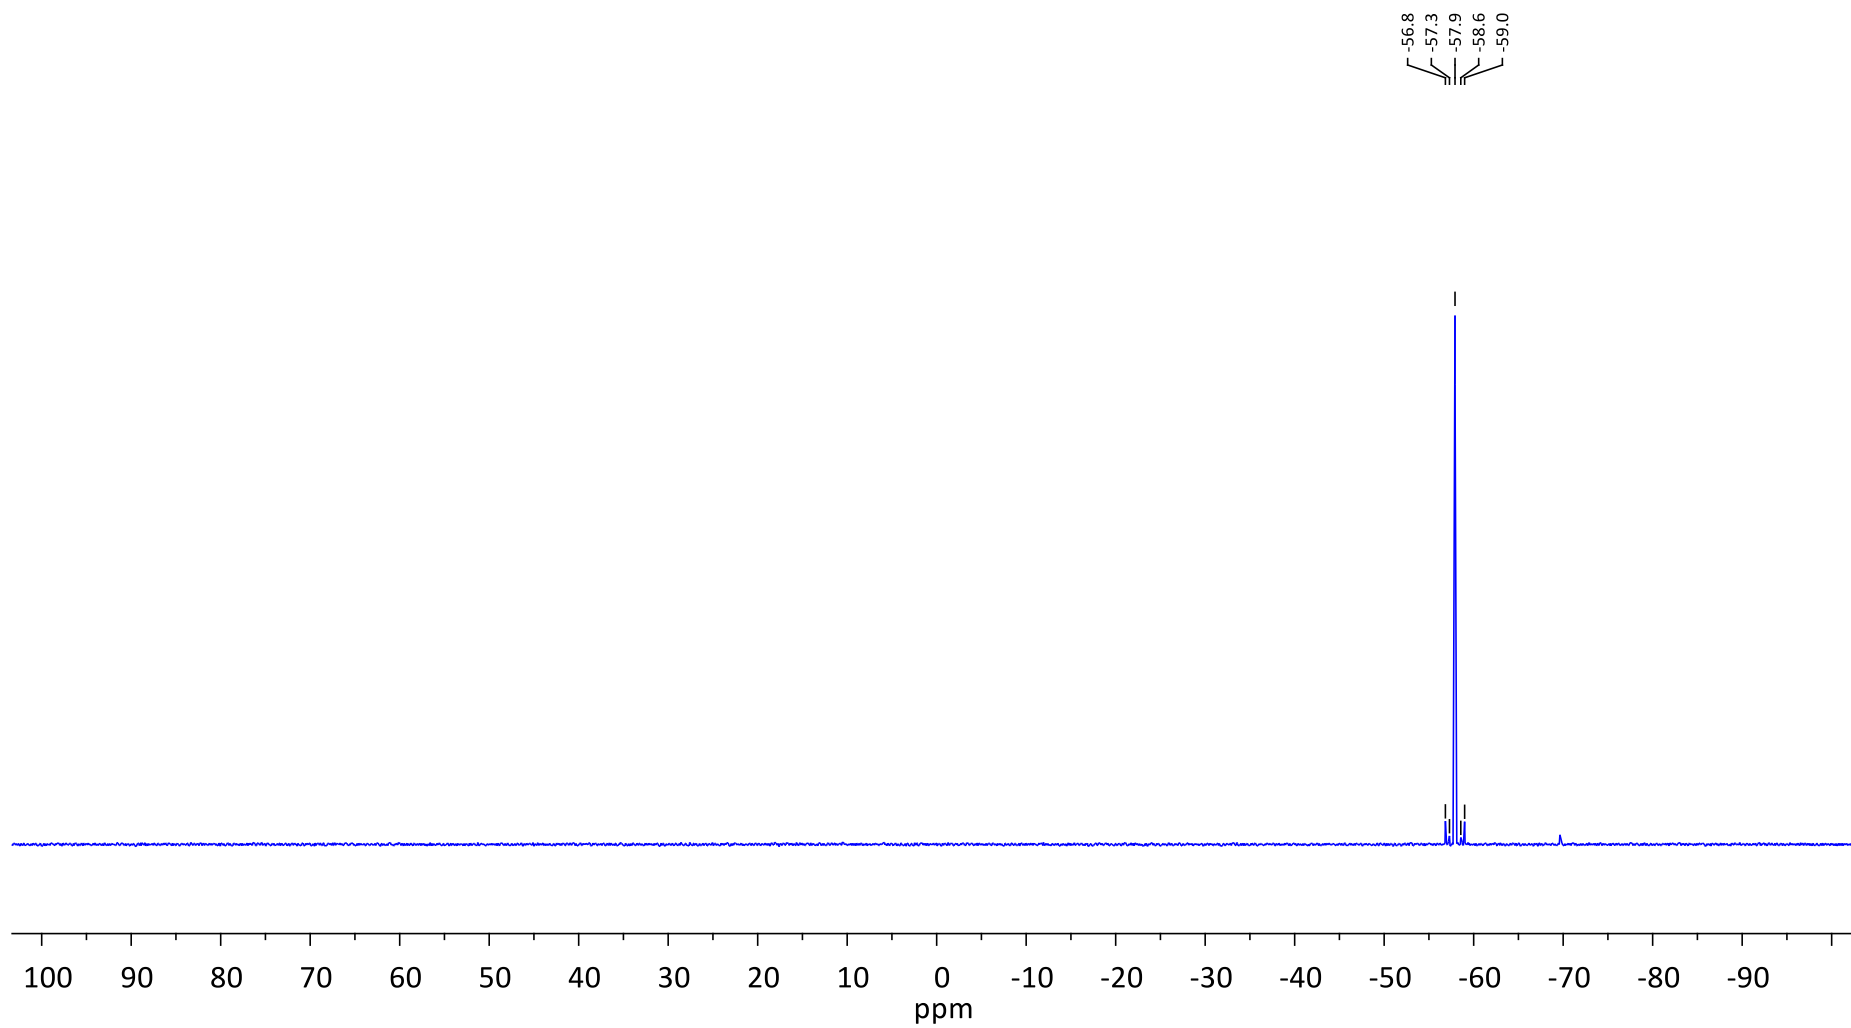

**Fig. S8**  $^{119}\text{Sn}$  NMR spectrum of **3b** in  $\text{C}_6\text{D}_6$ .

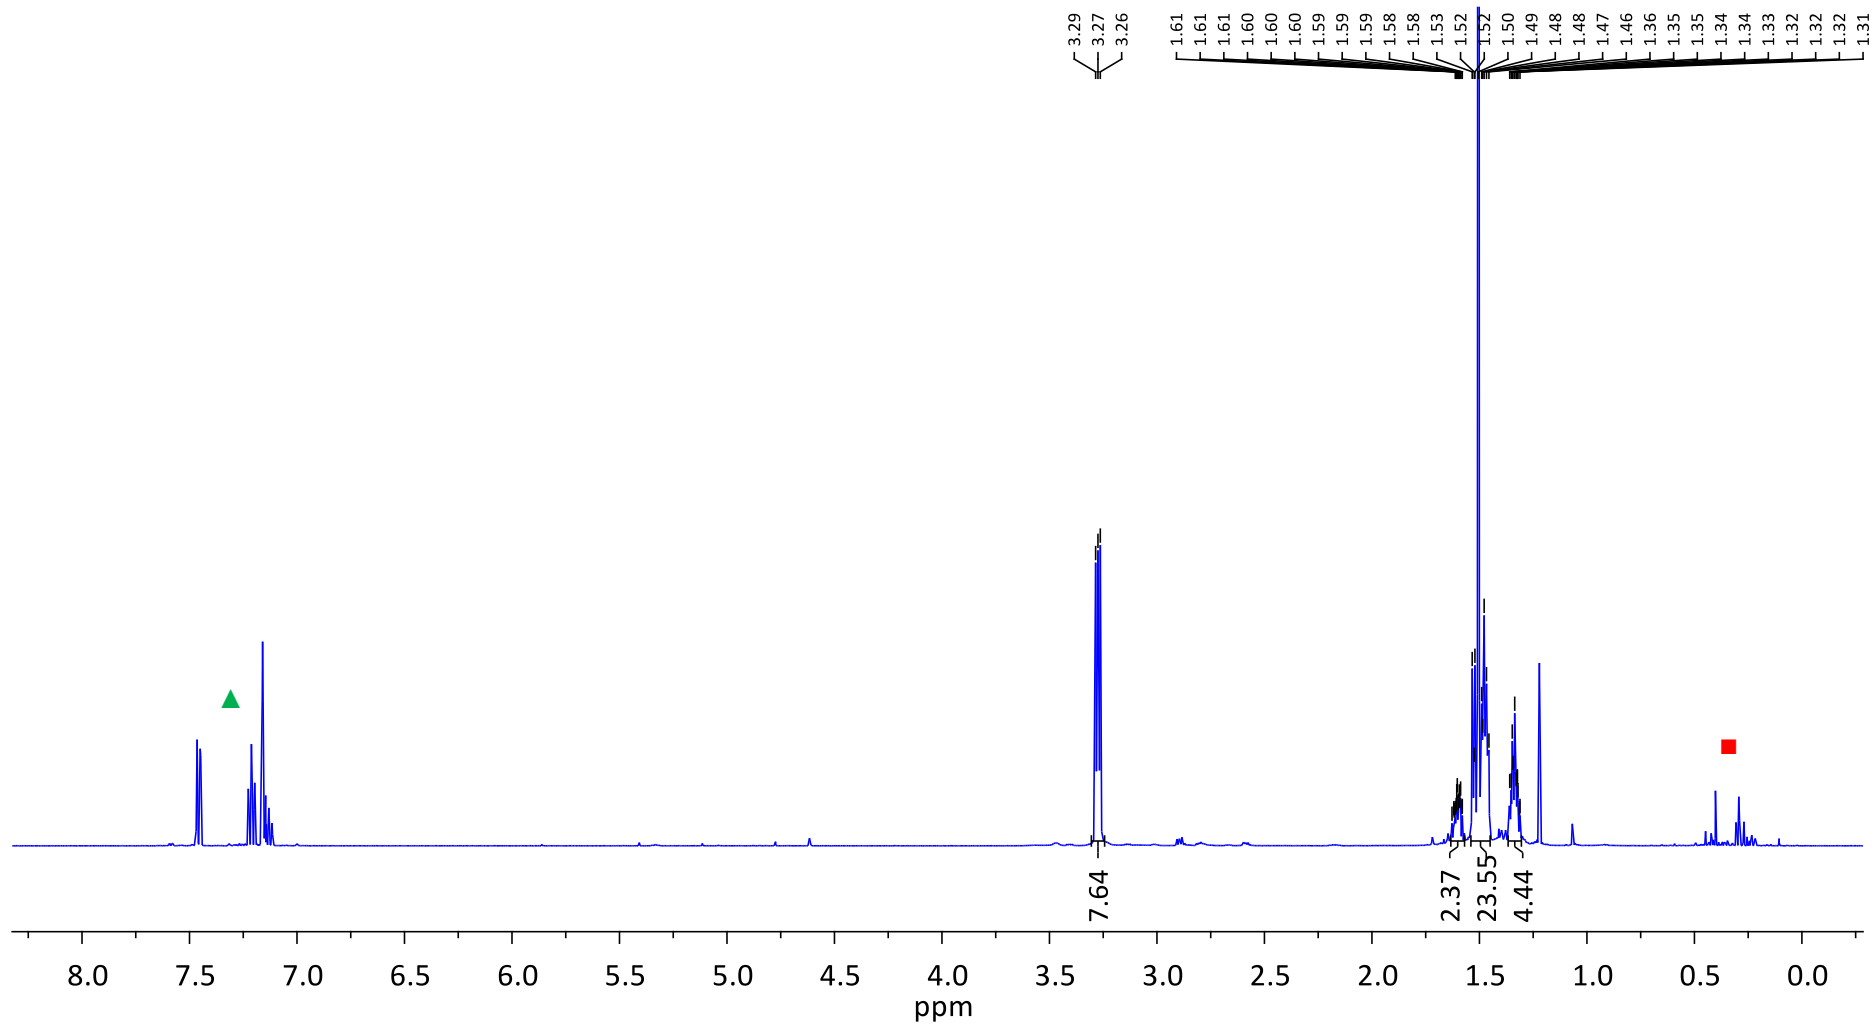

**Fig. S9**  $^1\text{H}\{^{11}\text{B}\}$  NMR spectrum of **4a** in  $\text{C}_6\text{D}_6$ .  $\blacktriangle$  = naphthalene,  $\blacksquare$  =  $\text{Sn}_x\text{Me}_y$ .

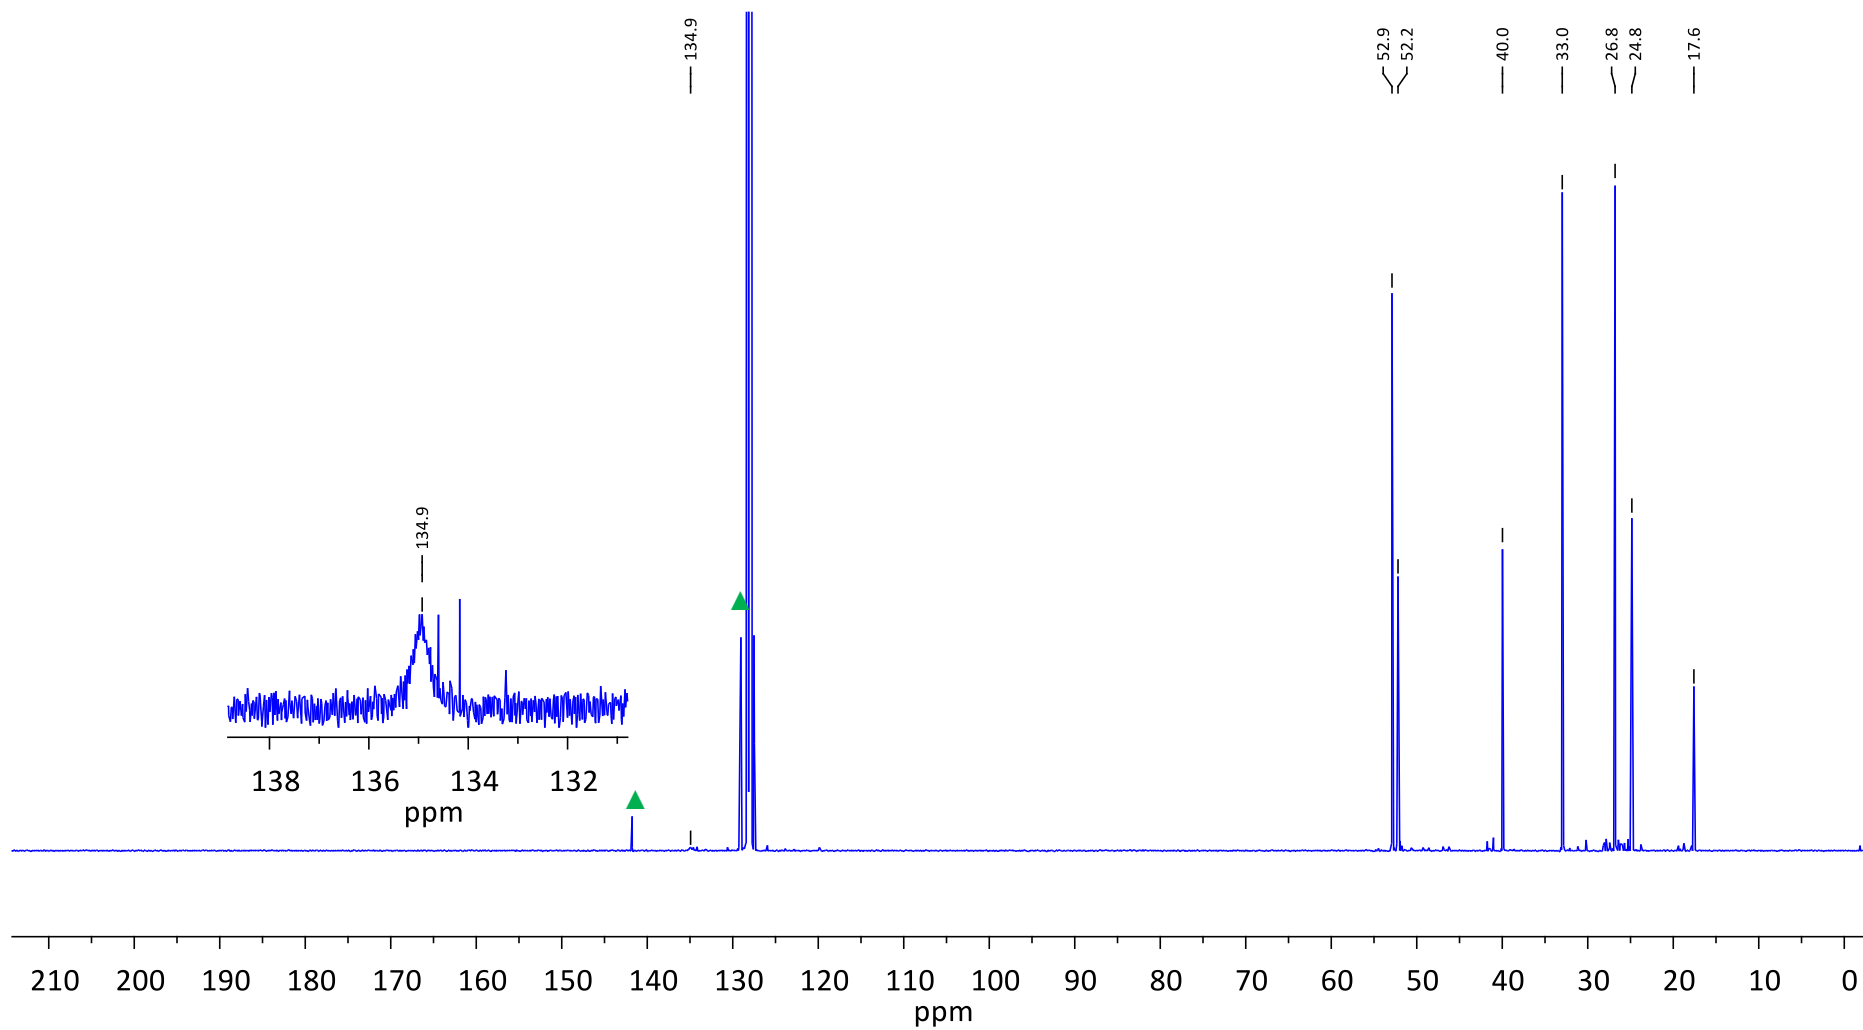

**Fig. S10**  $^{13}\text{C}\{^1\text{H}, ^{11}\text{B}\}$  NMR spectrum of **4a** in  $\text{C}_6\text{D}_6$ .  $\blacktriangle$  = naphthalene.

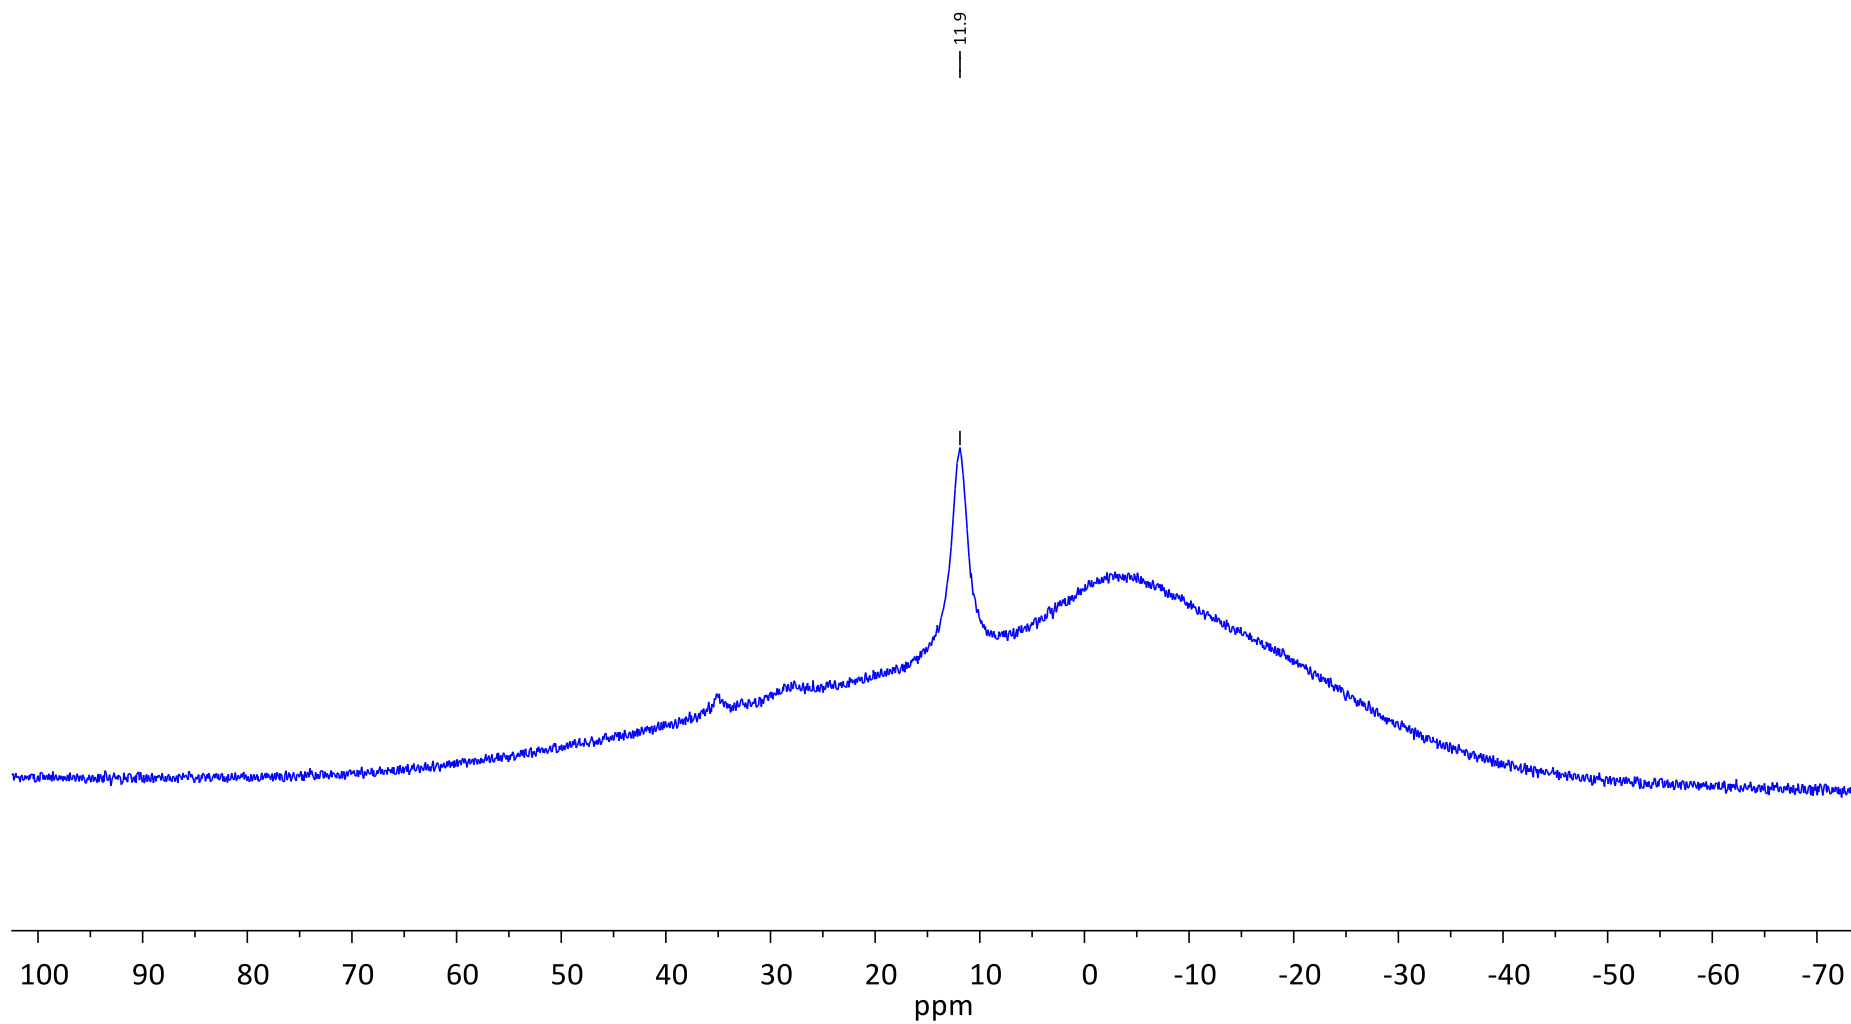

**Fig. S11**  $^{11}\text{B}$  NMR spectrum of **4a** in  $\text{C}_6\text{D}_6$ .

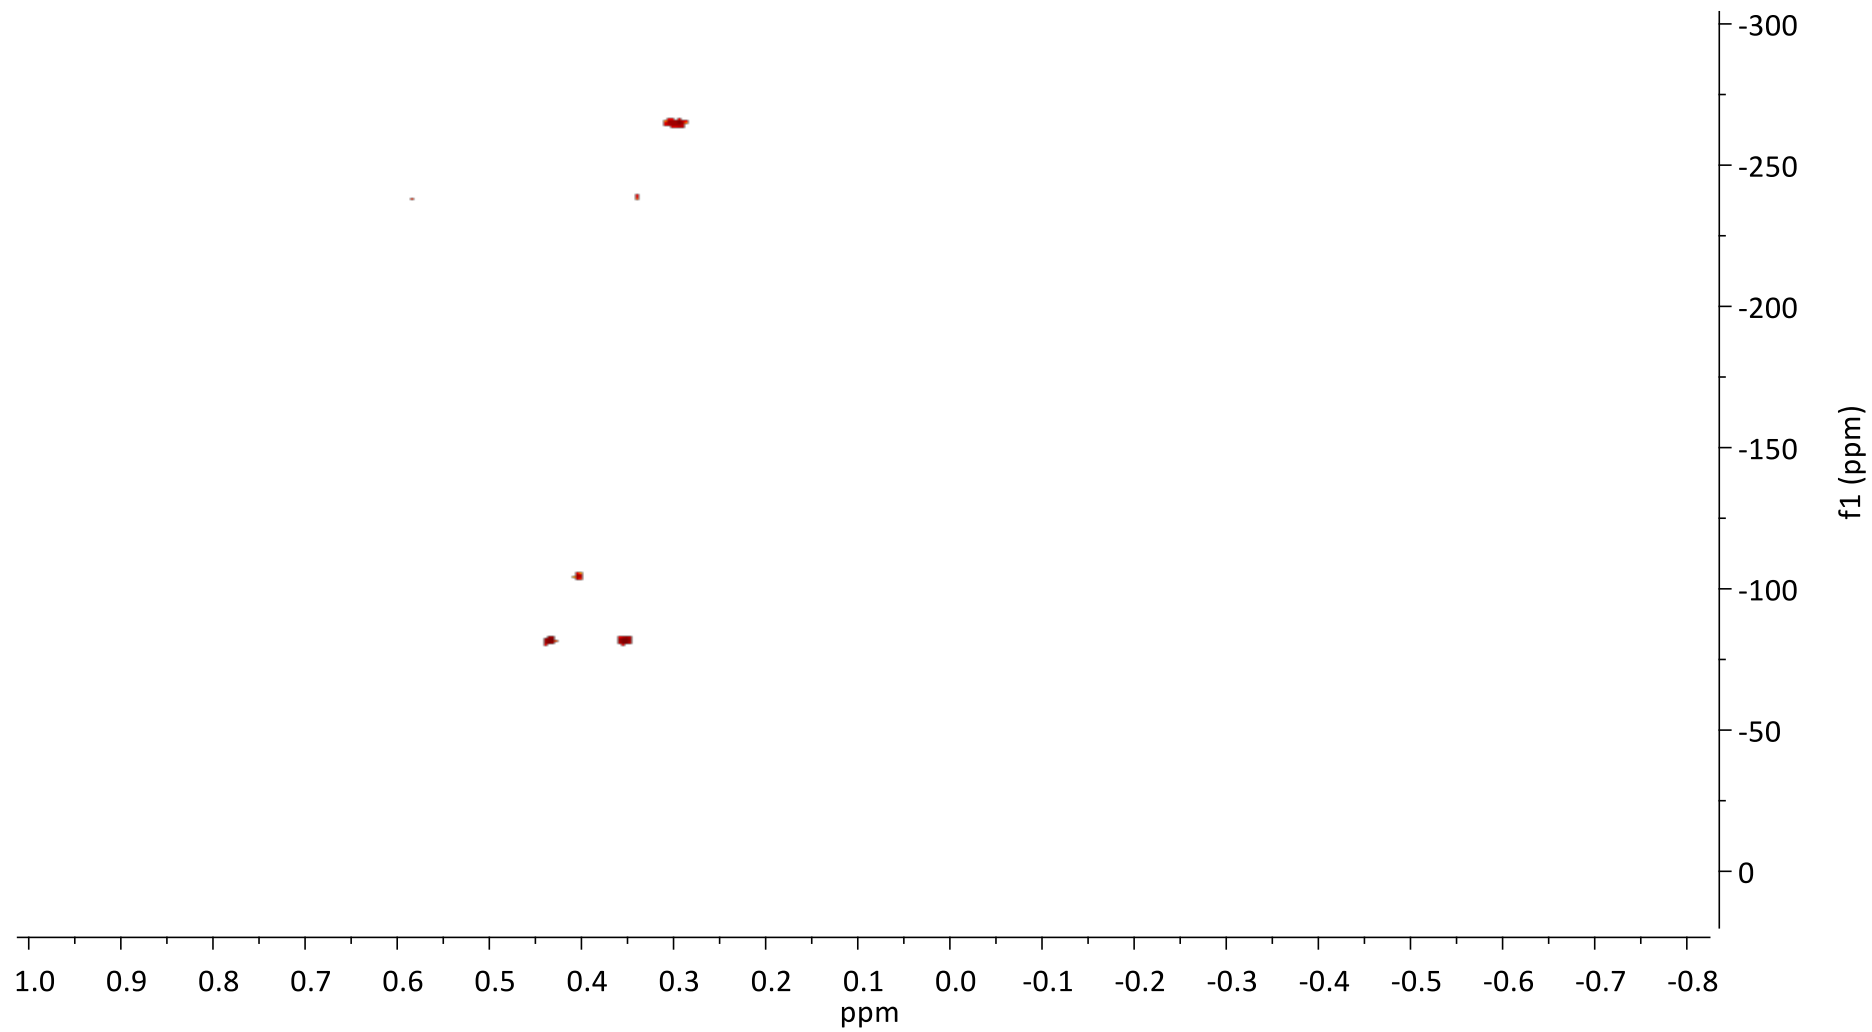

**Fig. S12**  $^{119}\text{Sn}^1\text{H}$  HMQC NMR spectrum of **4a** in  $\text{C}_6\text{D}_6$ .

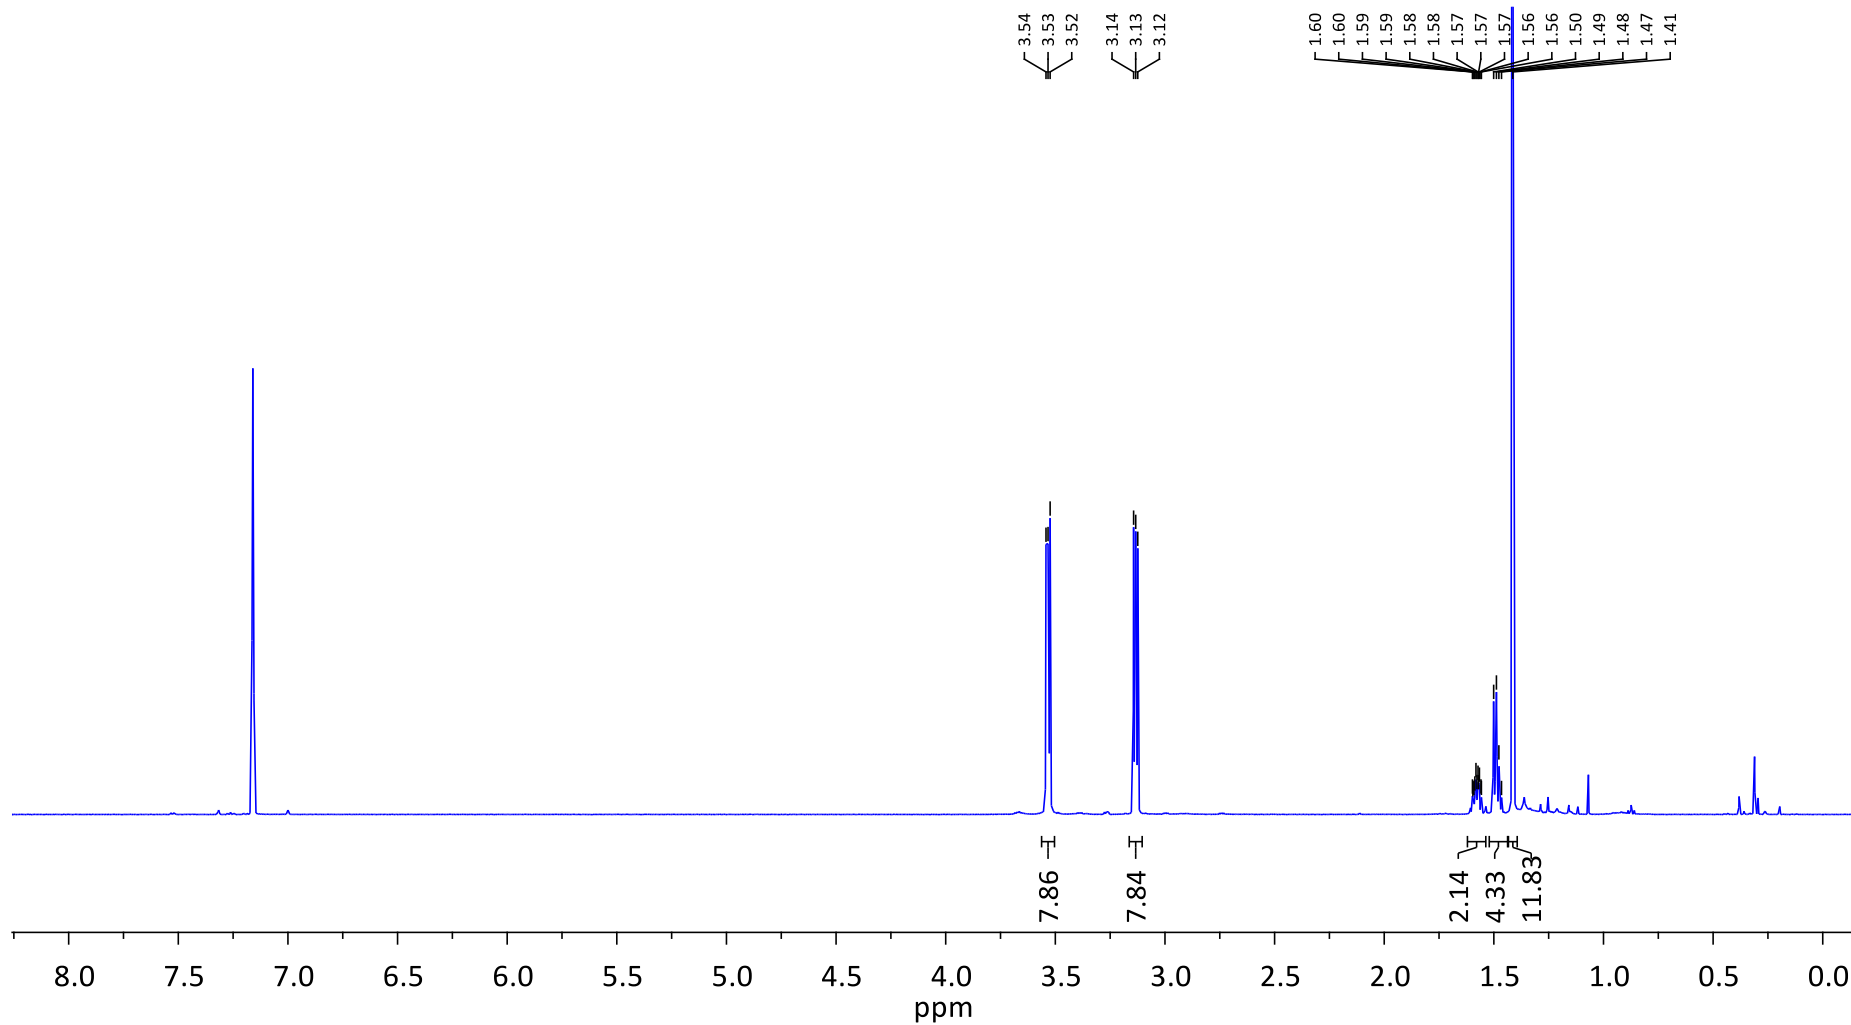

**Fig. S13**  $^1\text{H}\{^{11}\text{B}\}$  NMR spectrum of **4b** in  $\text{C}_6\text{D}_6$ .



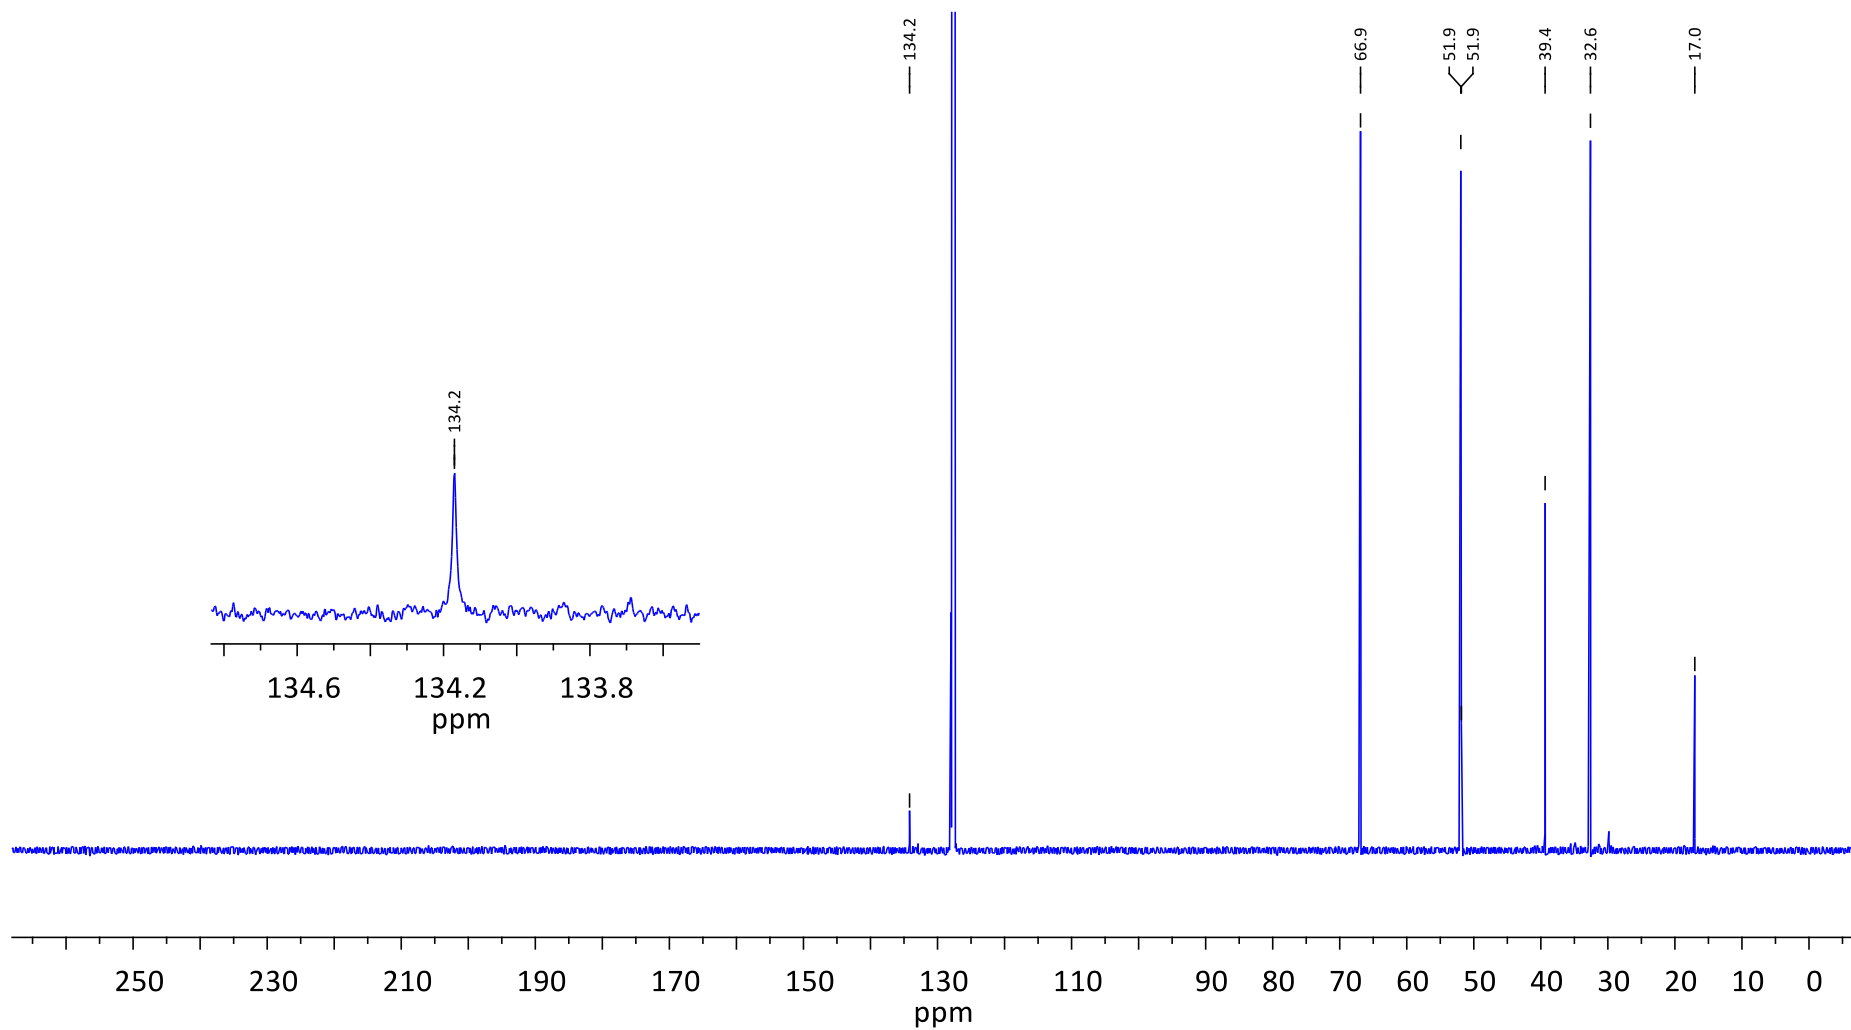

**Fig. S14**  $^{13}\text{C}\{^1\text{H},^{11}\text{B}\}$  NMR spectrum of **4b** in  $\text{C}_6\text{D}_6$ .

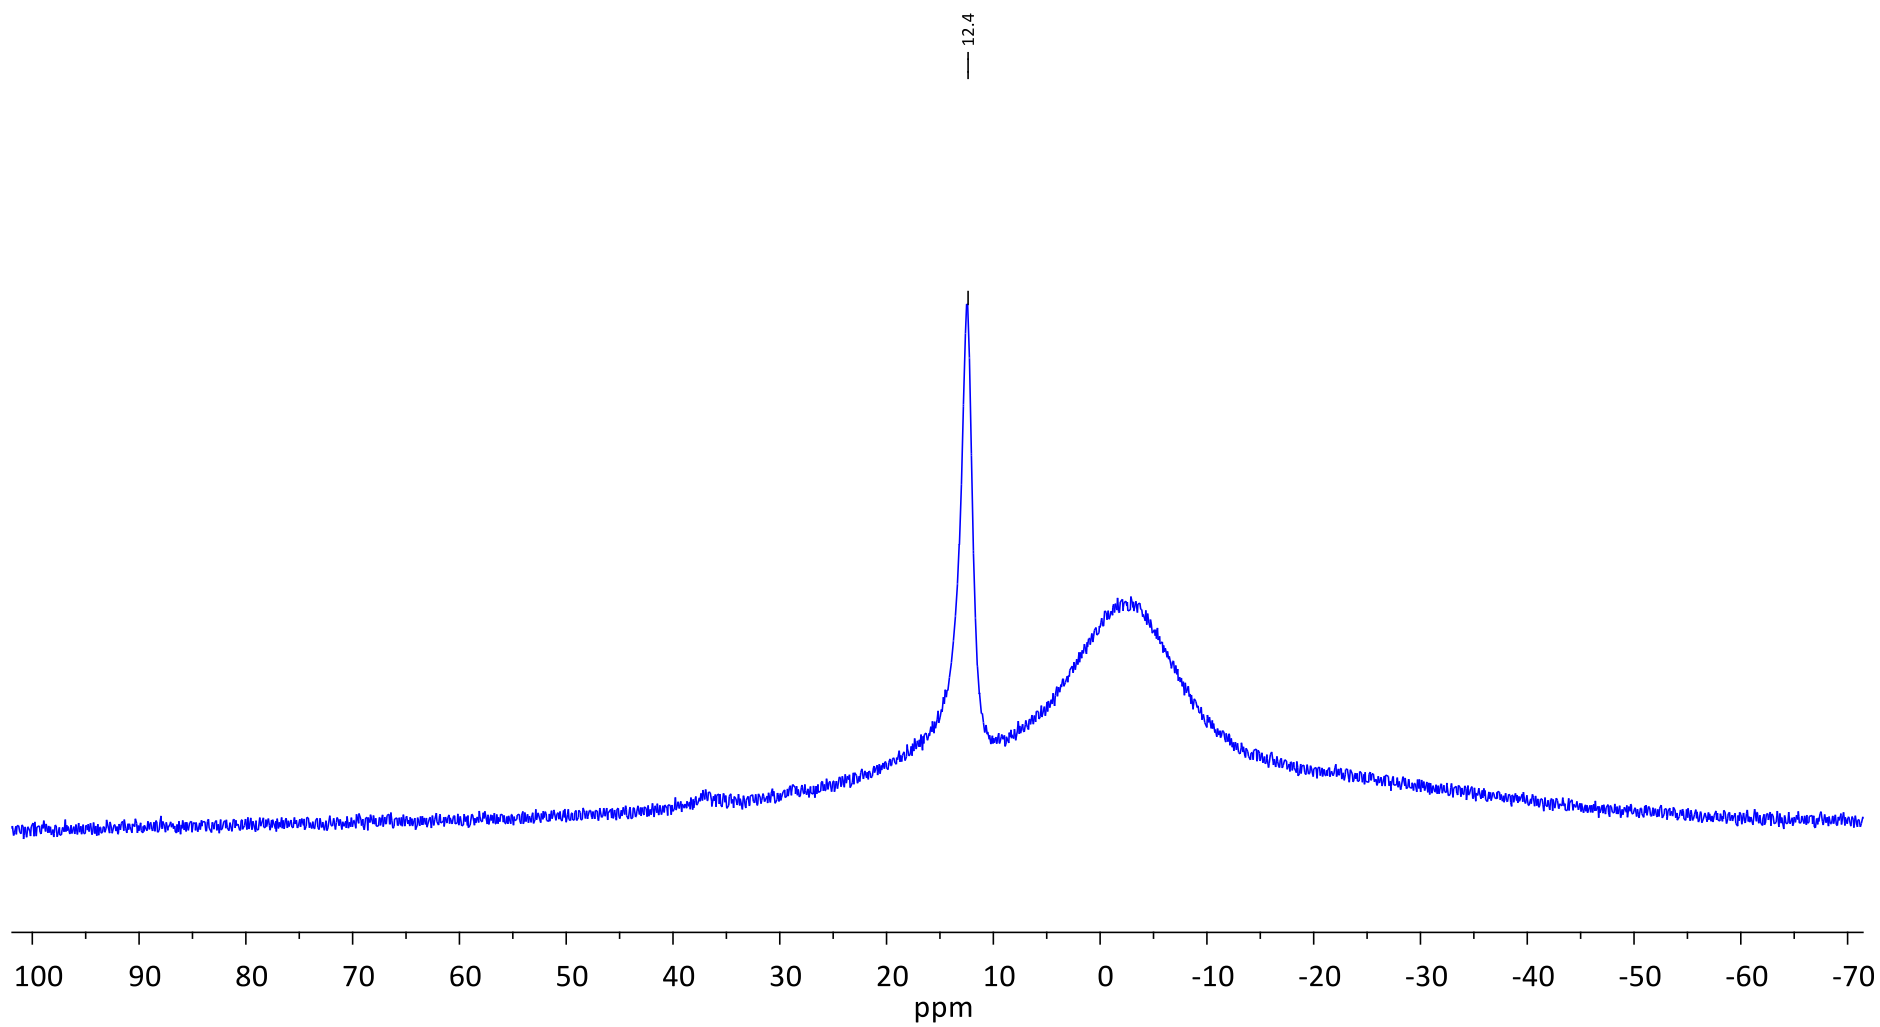

**Fig. S15**  $^{11}\text{B}$  NMR spectrum of **4b** in  $\text{C}_6\text{D}_6$ .

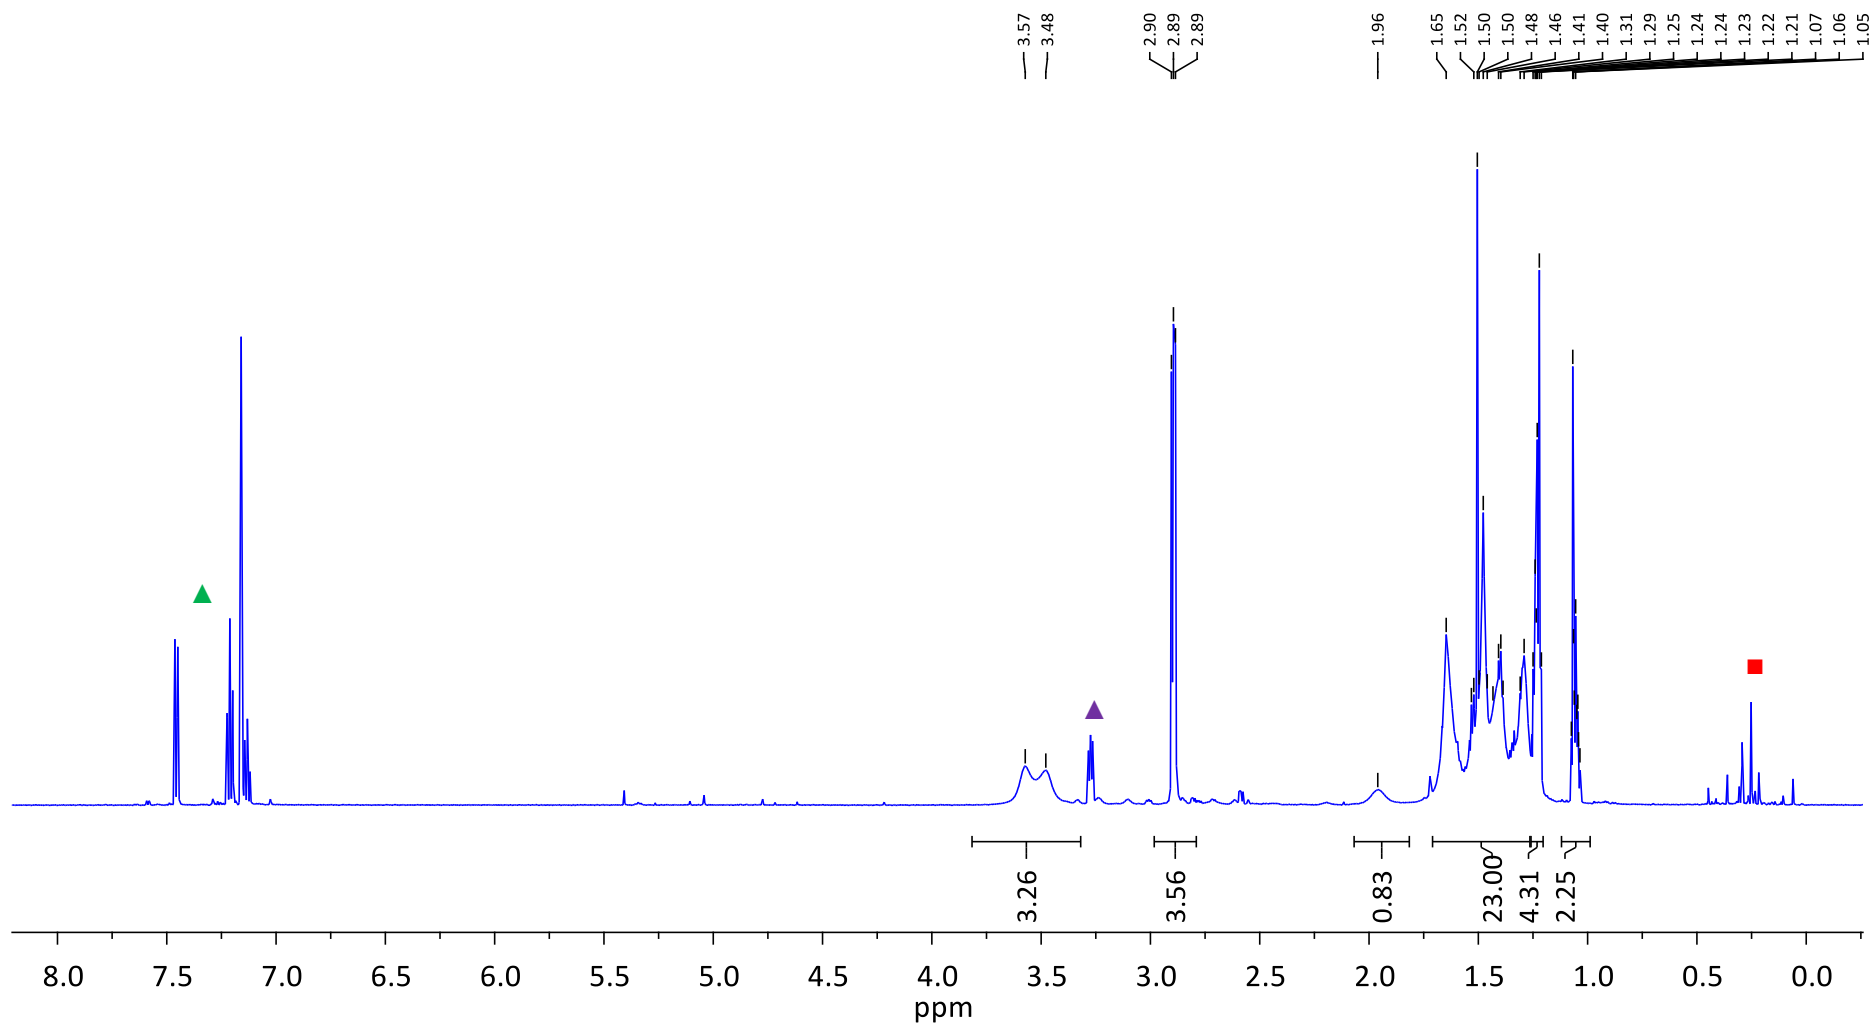

**Fig. S16**  $^1\text{H}\{^{11}\text{B}\}$  NMR spectrum of **5a** in  $\text{C}_6\text{D}_6$ .  $\blacktriangle$  = naphthalene,  $\blacktriangle$  = **4a**,  $\blacksquare$  =  $\text{Sn}_x\text{Me}_y$ .

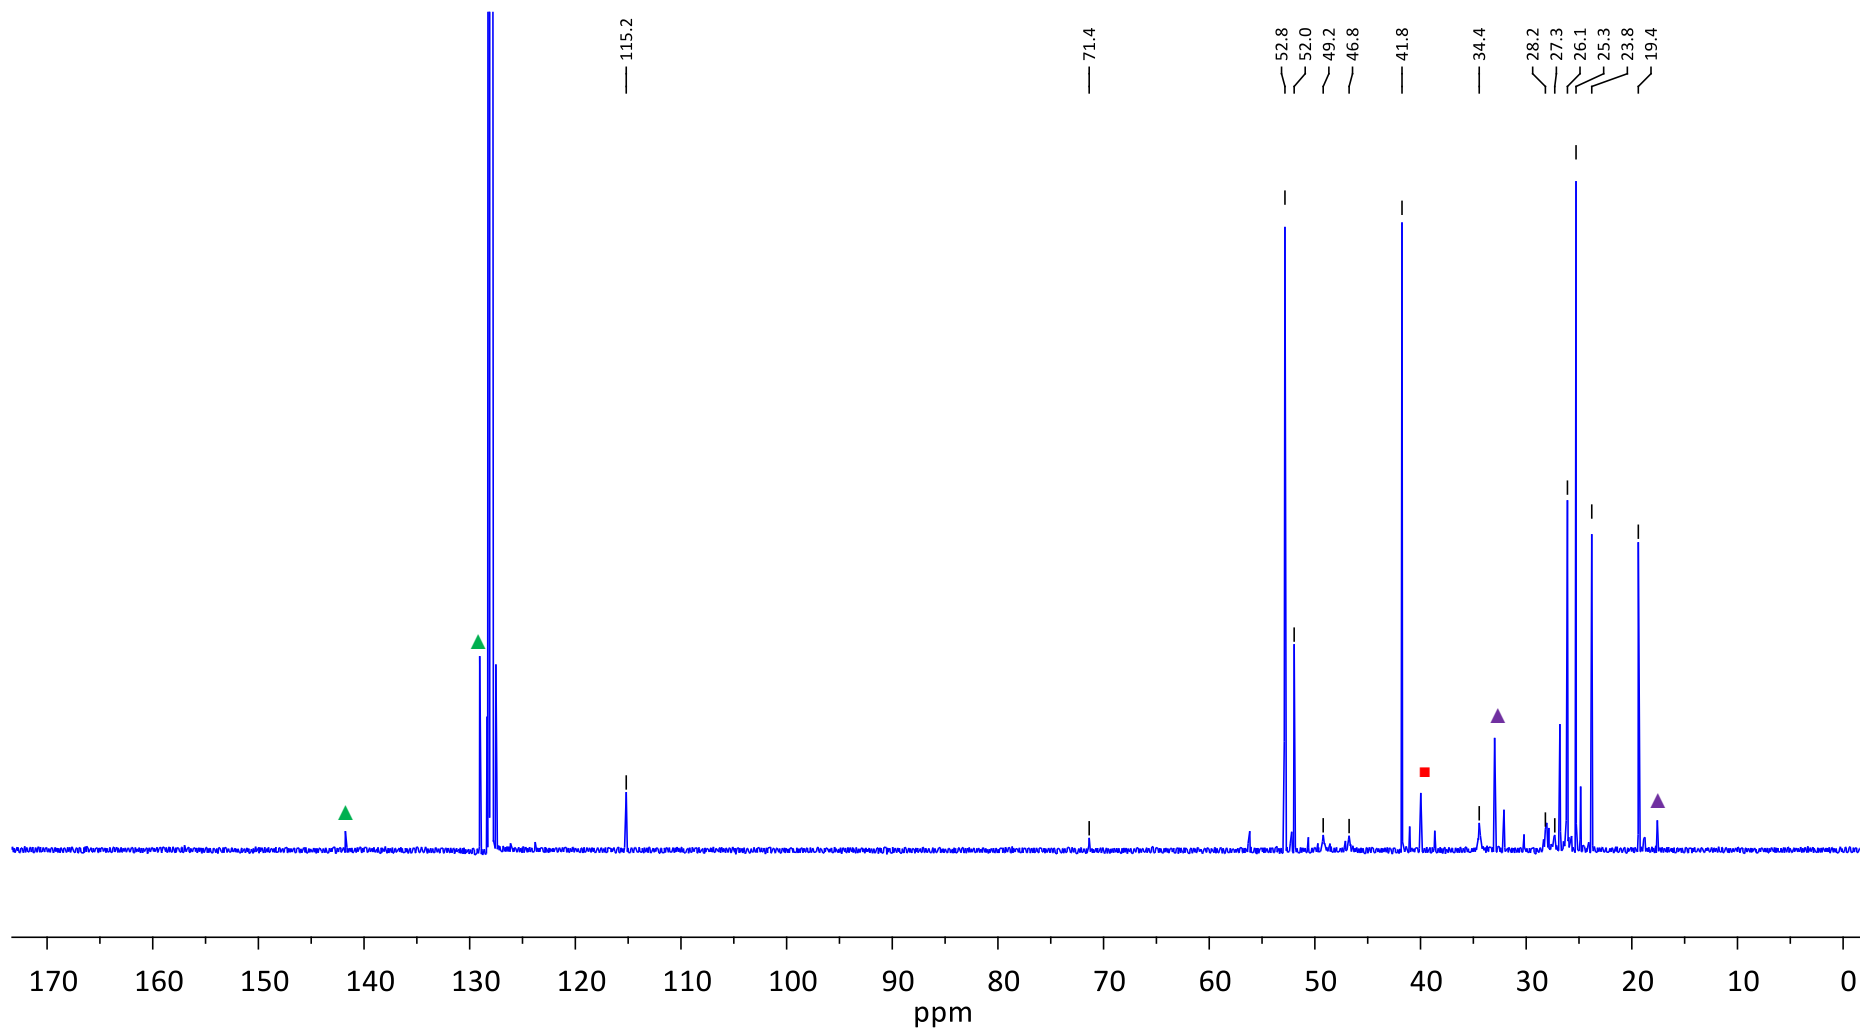

**Fig. S17**  $^{13}\text{C}\{^1\text{H},^{11}\text{B}\}$  NMR spectrum of **5a** in  $\text{C}_6\text{D}_6$ .  $\blacktriangle$  = naphthalene,  $\blacktriangle$  = **4a**,  $\blacksquare$  = unknown side products.

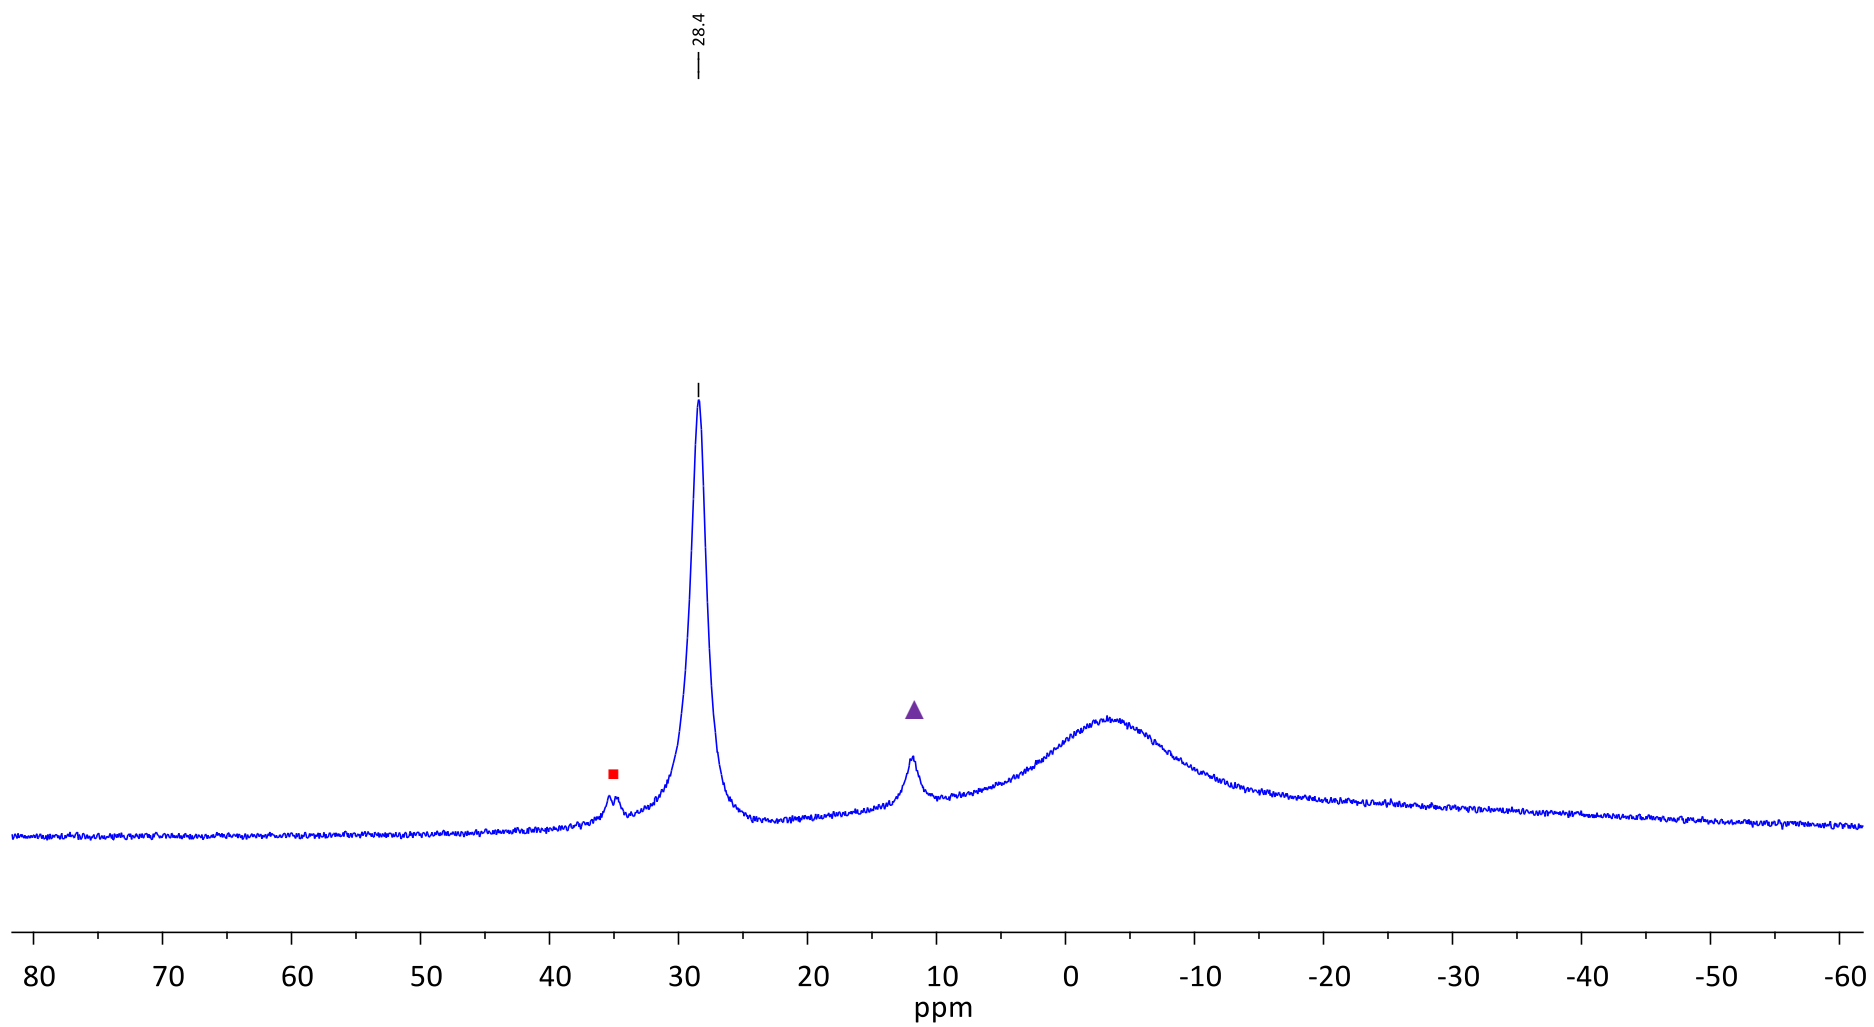

**Fig. S18**  $^{11}\text{B}$  NMR spectrum of **5a** in  $\text{C}_6\text{D}_6$ .  $\blacktriangle$  = **4a**,  $\blacksquare$  = unknown side products.

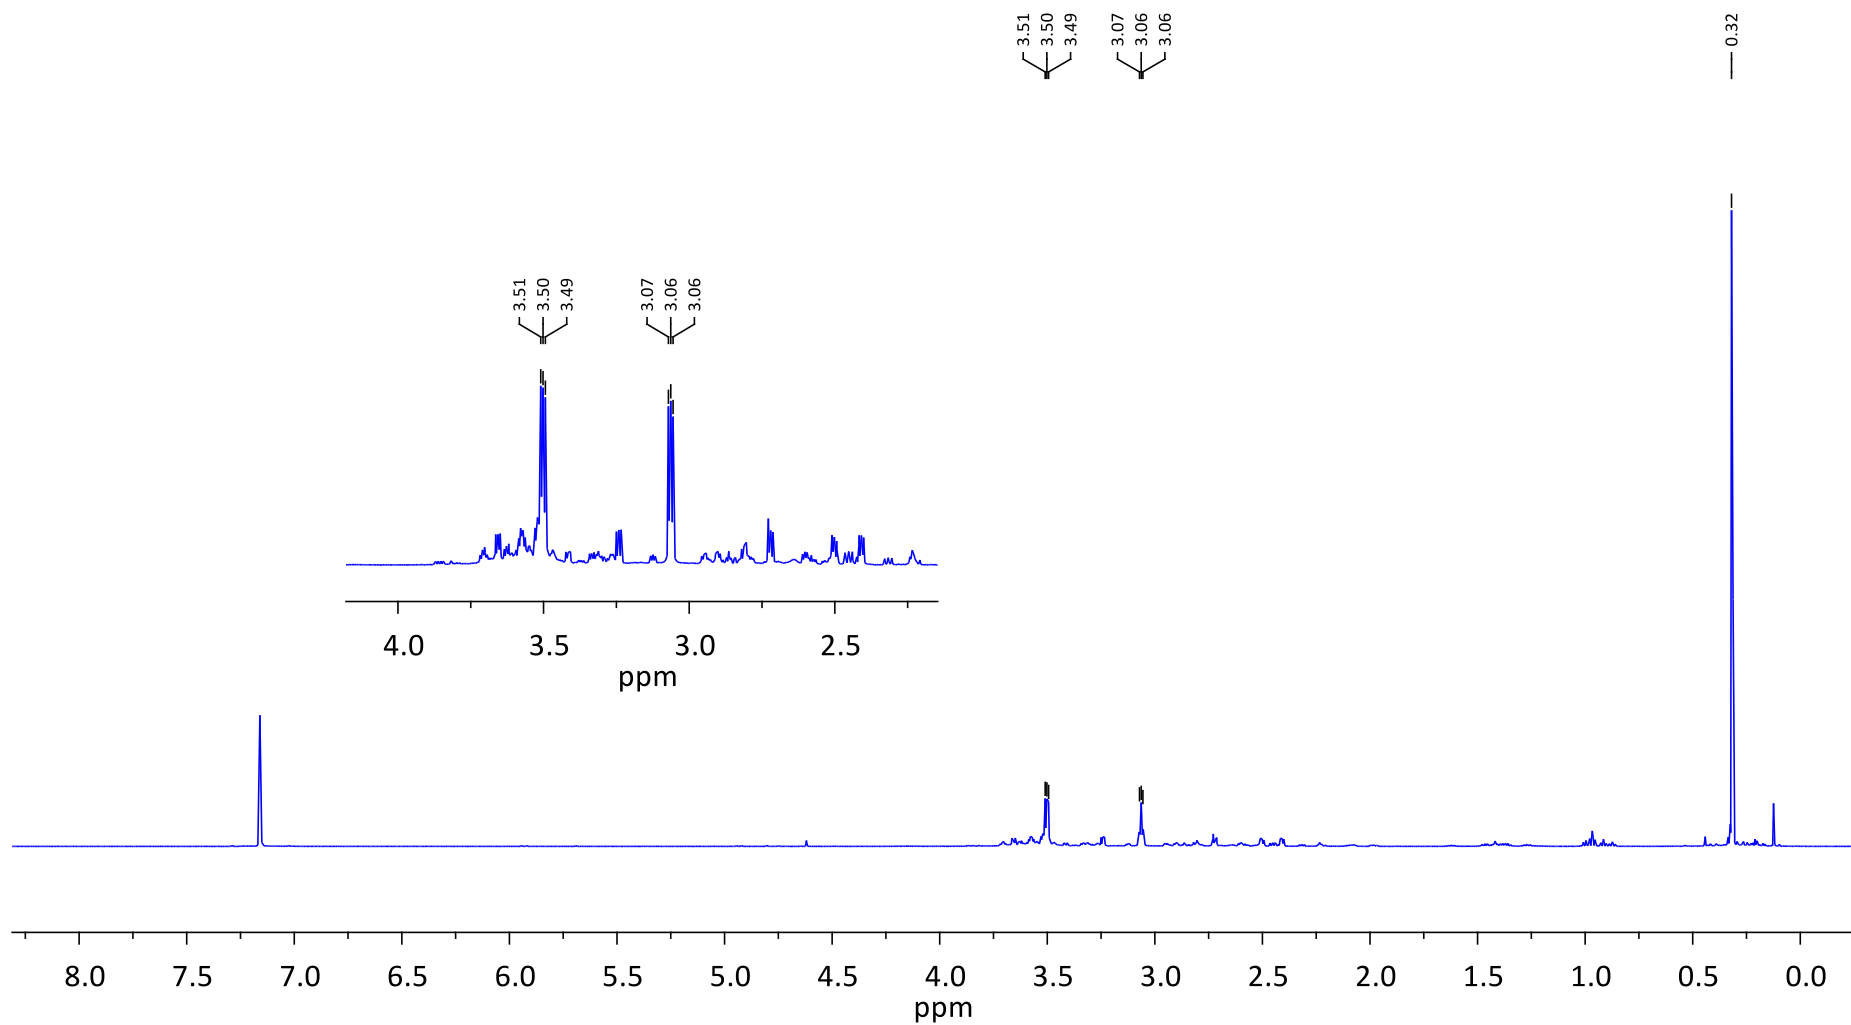

**Fig. S19**  $^1\text{H}\{^{11}\text{B}\}$  NMR spectrum of **7** in  $\text{C}_6\text{D}_6$ .

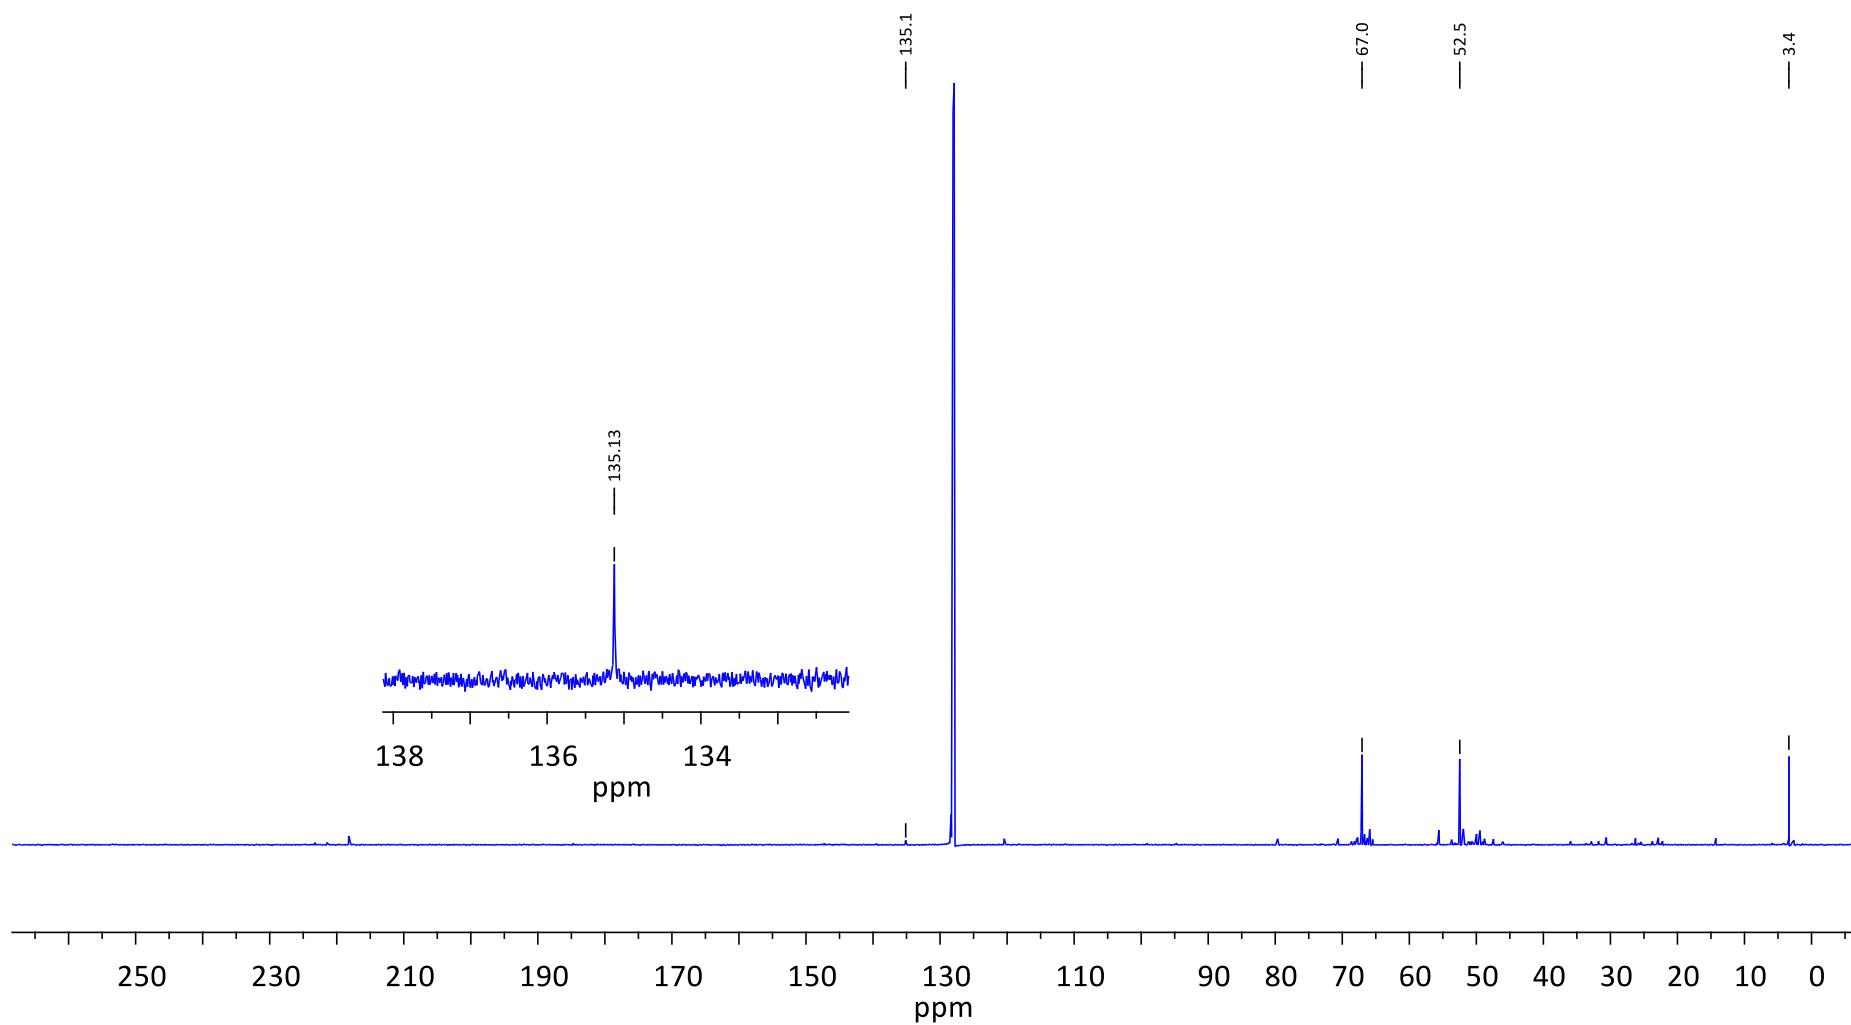

**Fig. S20**  $^{13}\text{C}\{^1\text{H}, ^{11}\text{B}\}$  NMR spectrum of 7 in  $\text{C}_6\text{D}_6$ .

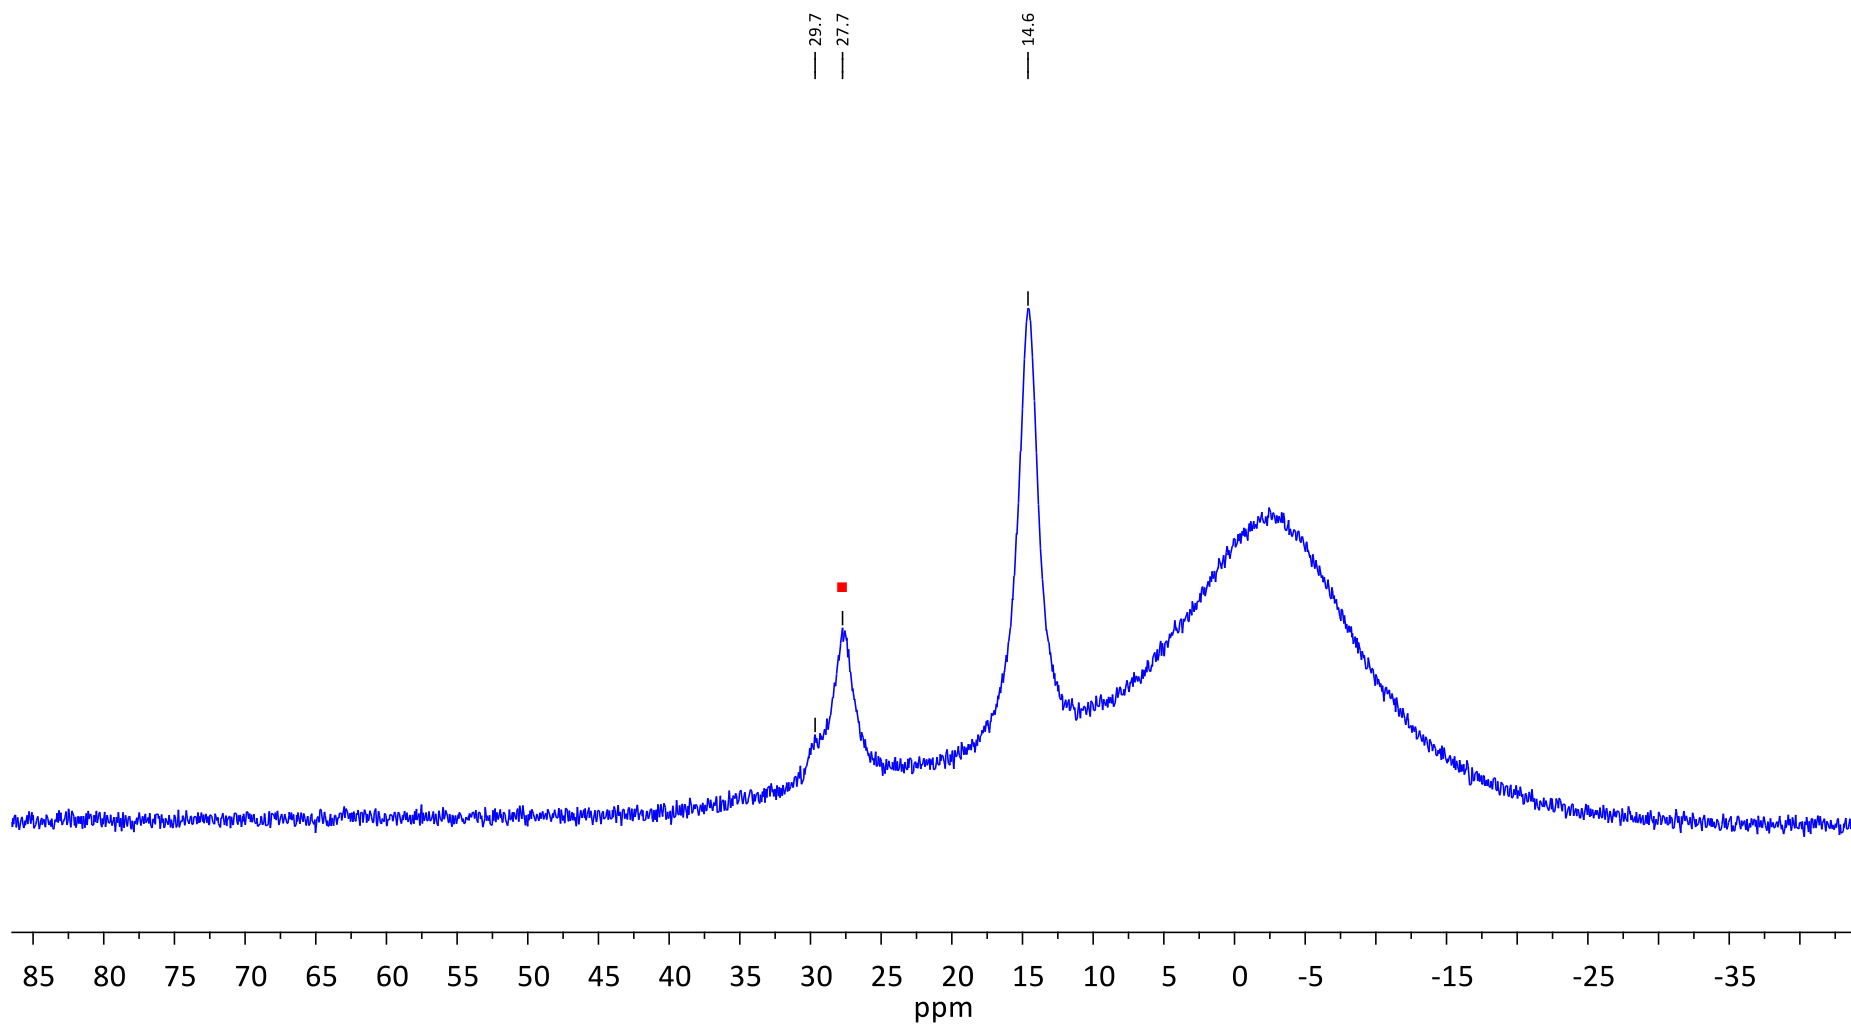

**Fig. S21**  $^{11}\text{B}$  NMR spectrum of 7 in  $\text{C}_6\text{D}_6$ . ■ = unknown side products.



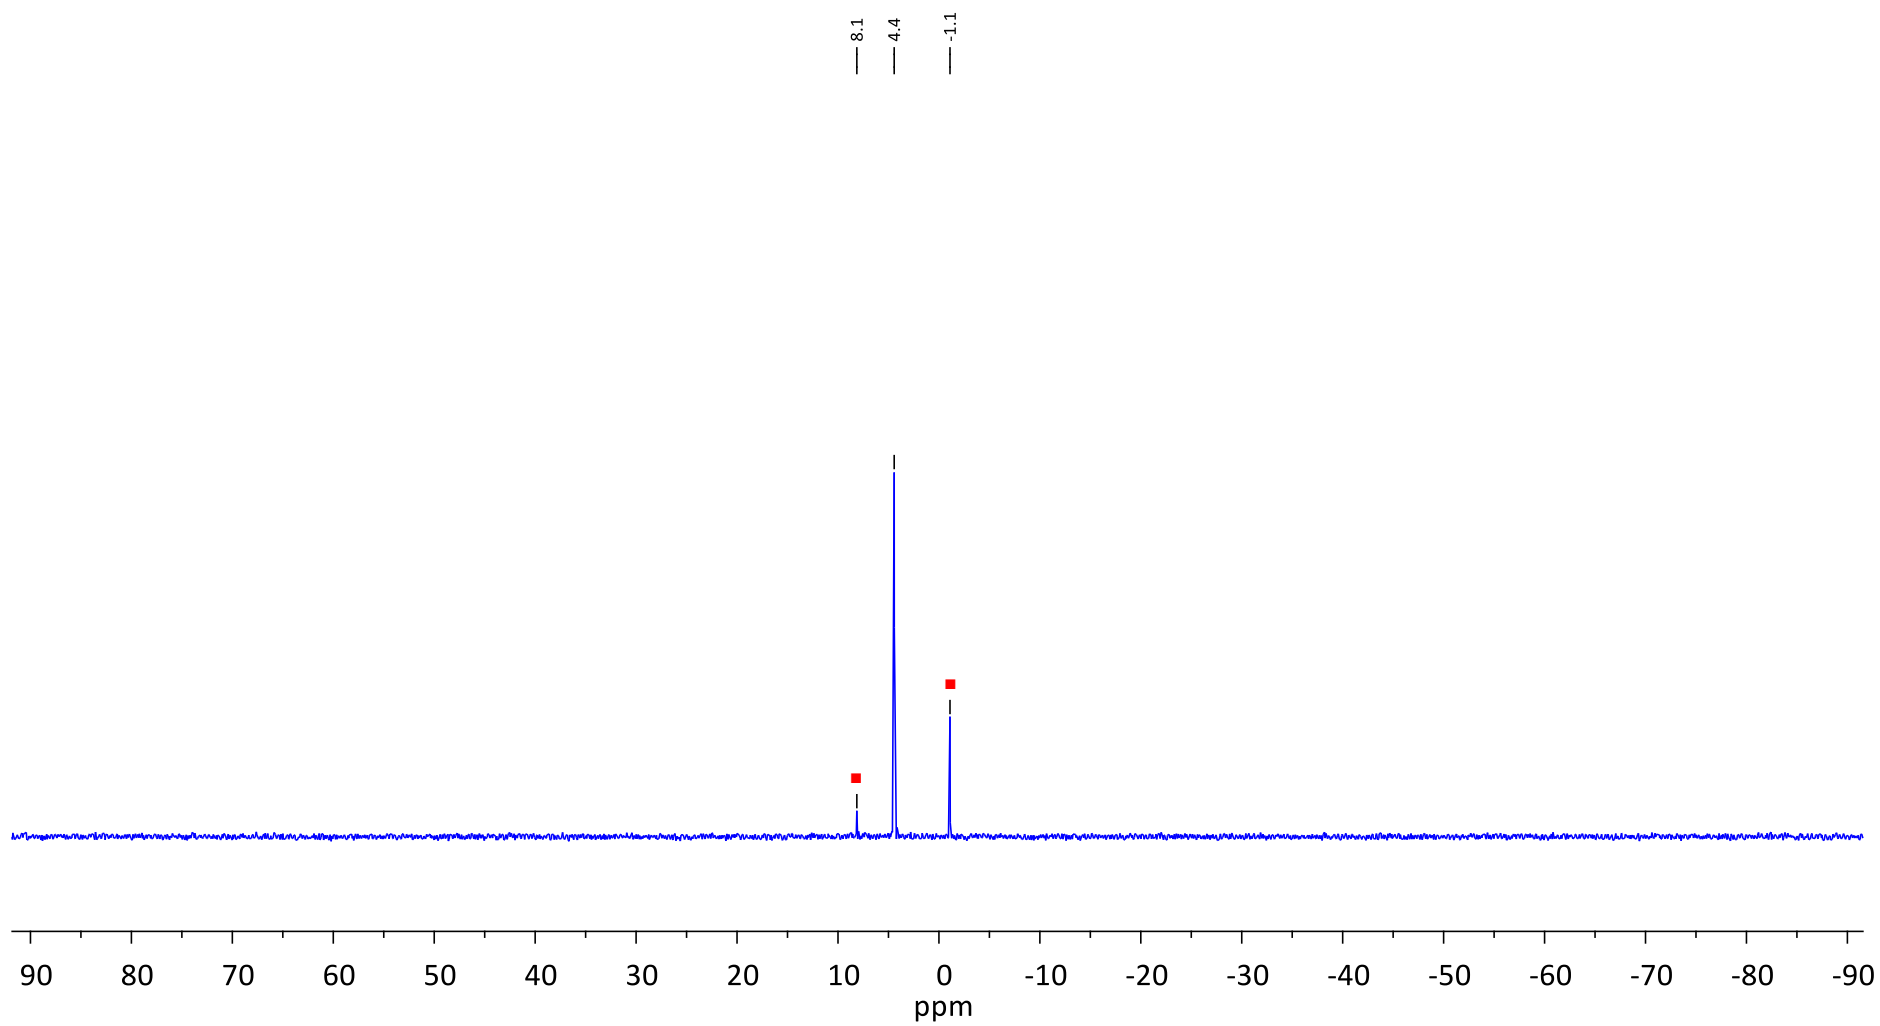

**Fig. S22**  $^{29}\text{Si}$  NMR spectrum of **7** in  $\text{C}_6\text{D}_6$ . ■ = unknown side products.

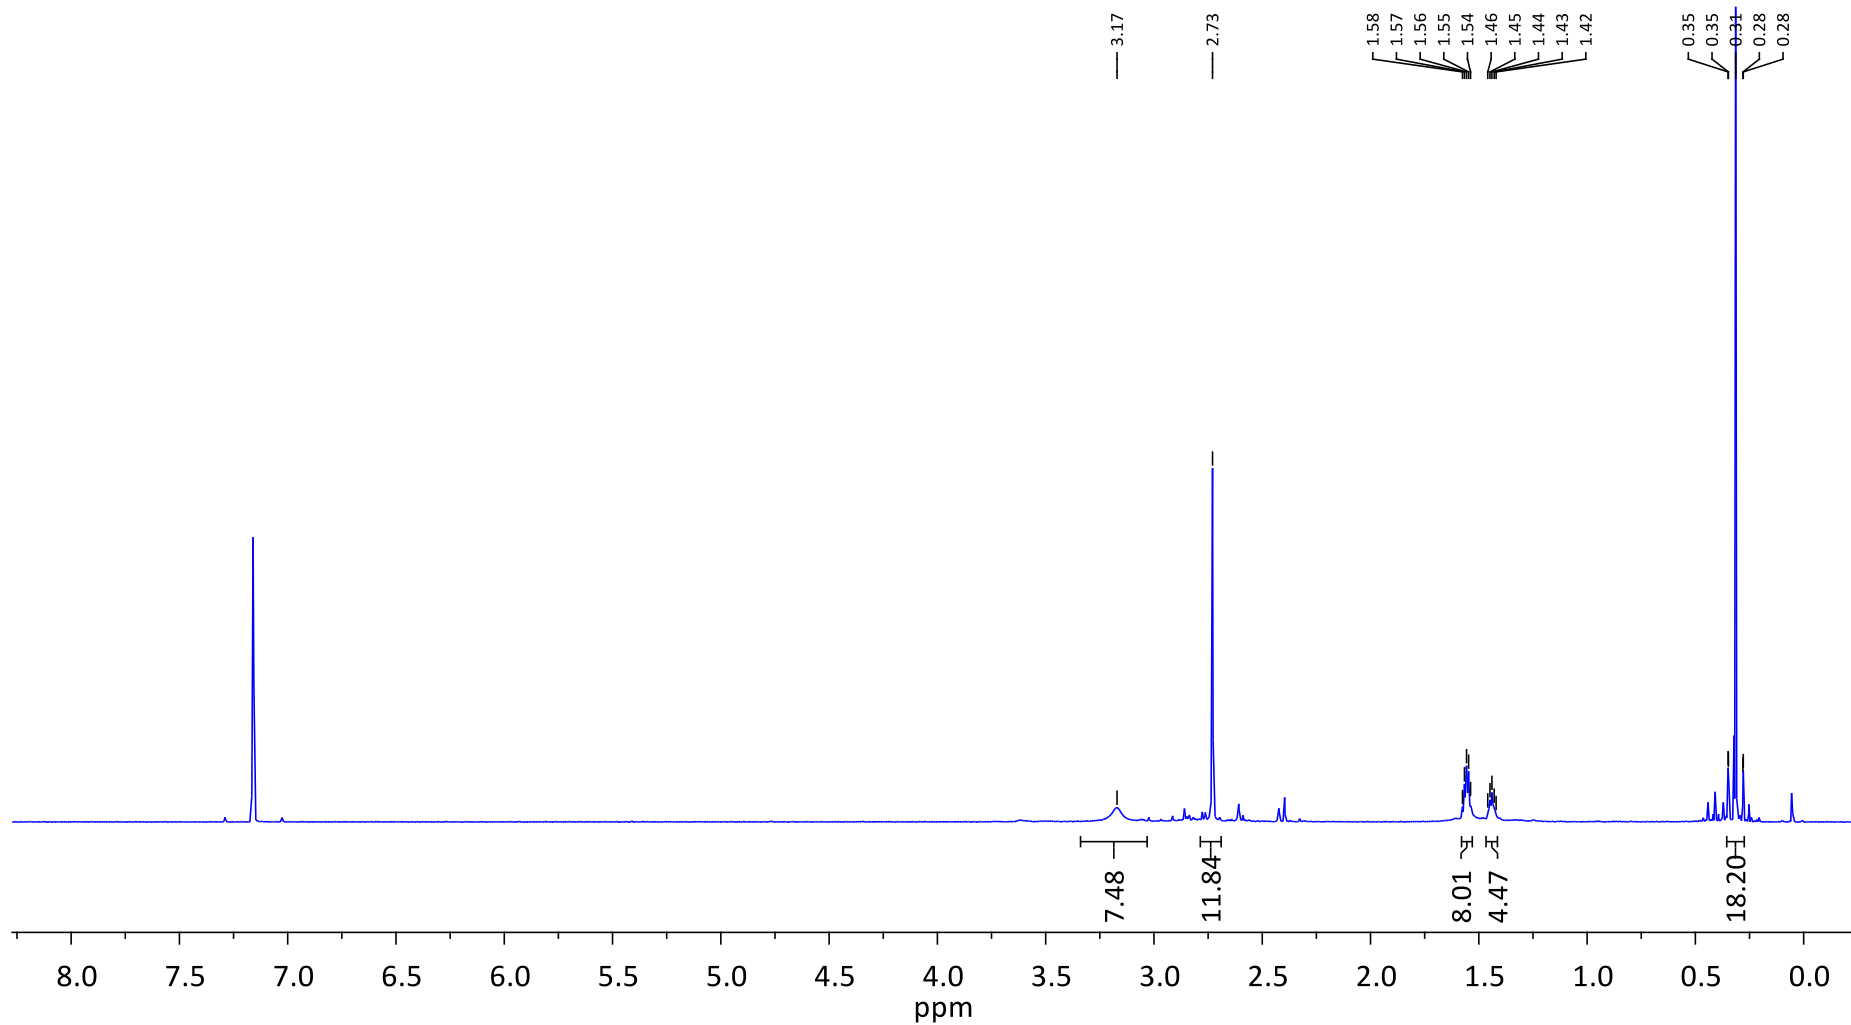

**Fig. S23**  $^1\text{H}\{^{11}\text{B}\}$  NMR spectrum of **9** in  $\text{C}_6\text{D}_6$ .

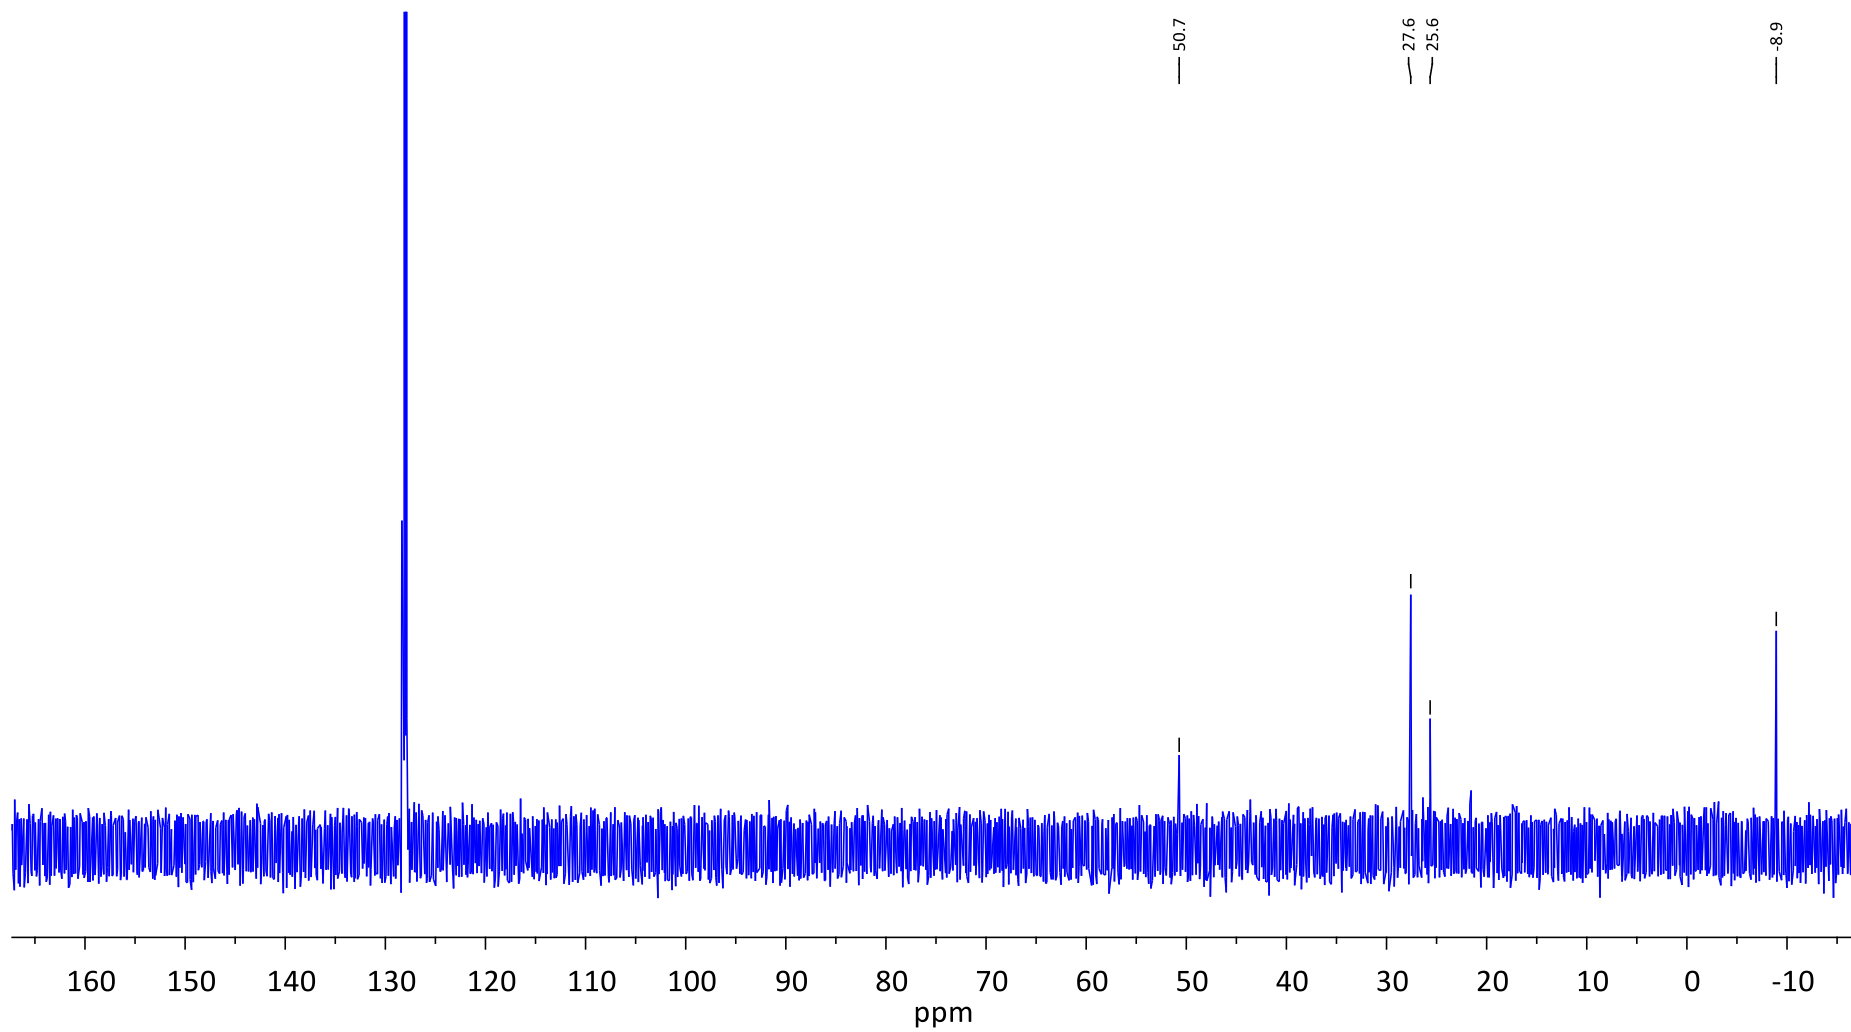

**Fig. S24**  $^{13}\text{C}\{^1\text{H},^{11}\text{B}\}$  NMR spectrum of **9** in  $\text{C}_6\text{D}_6$ .

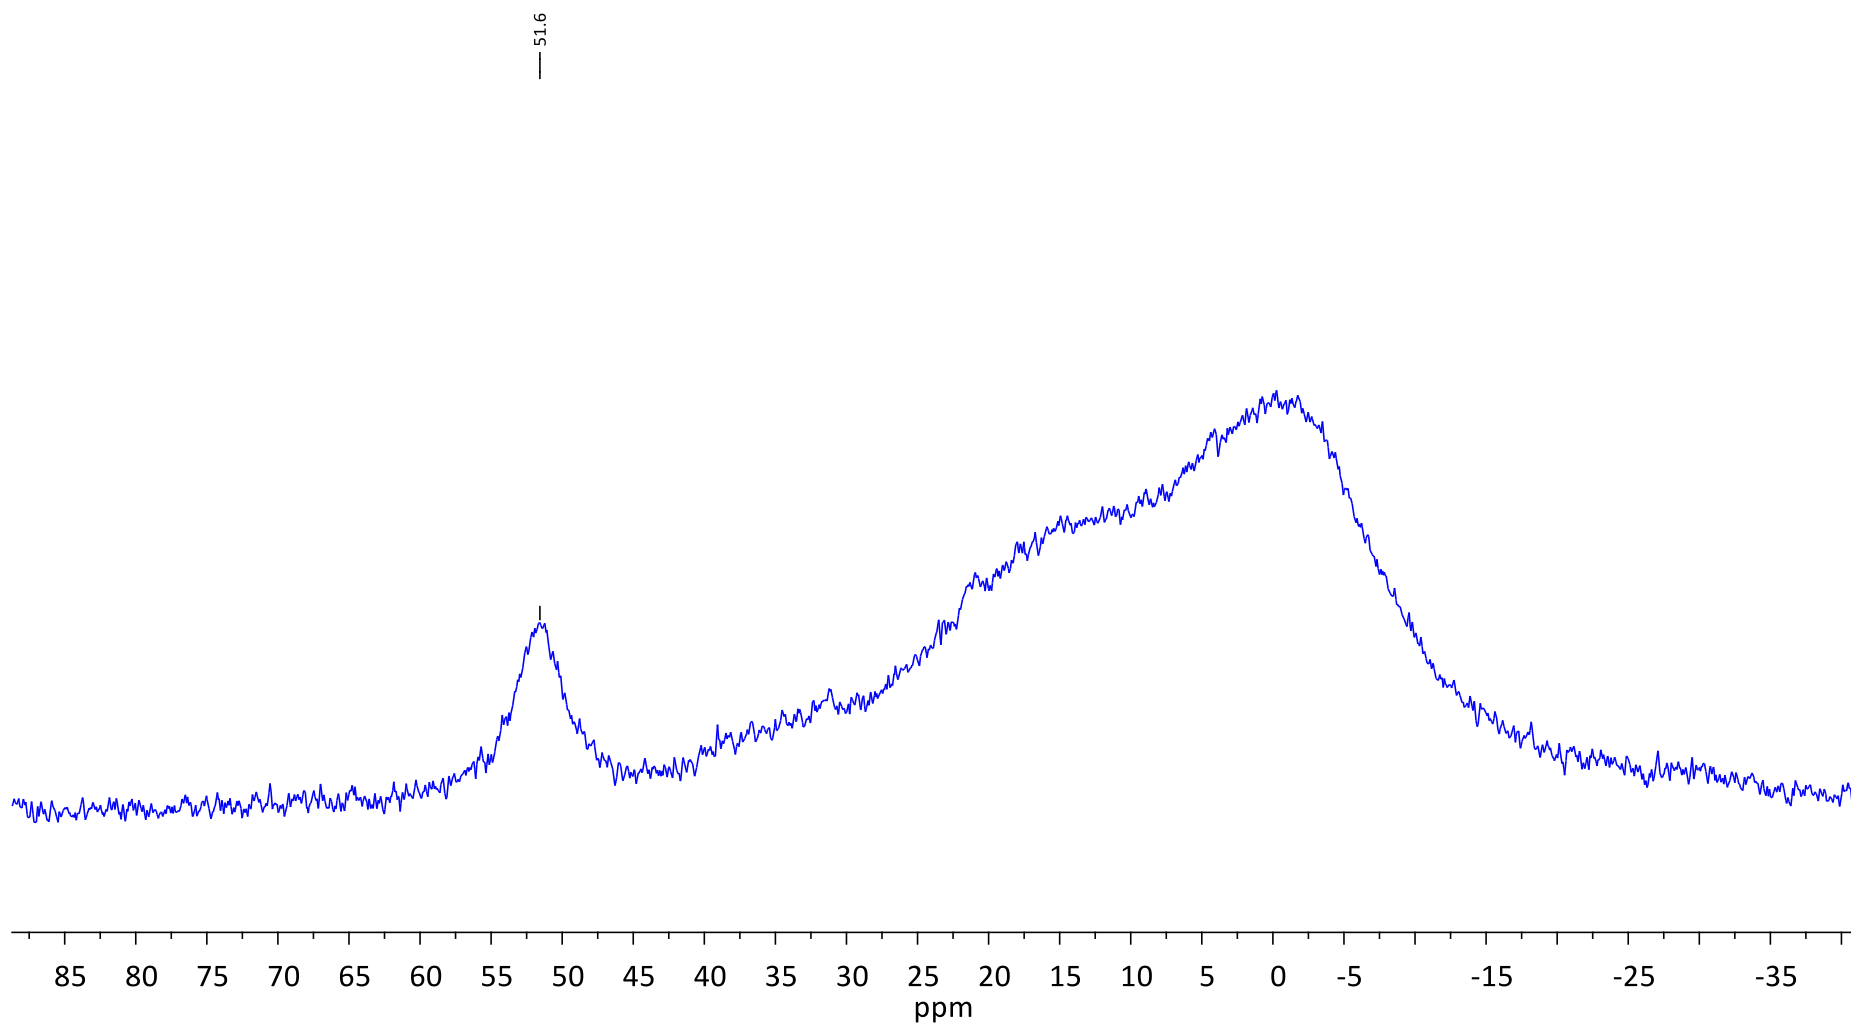

**Fig. S25**  $^{11}\text{B}$  NMR spectrum of **9** in  $\text{C}_6\text{D}_6$ .

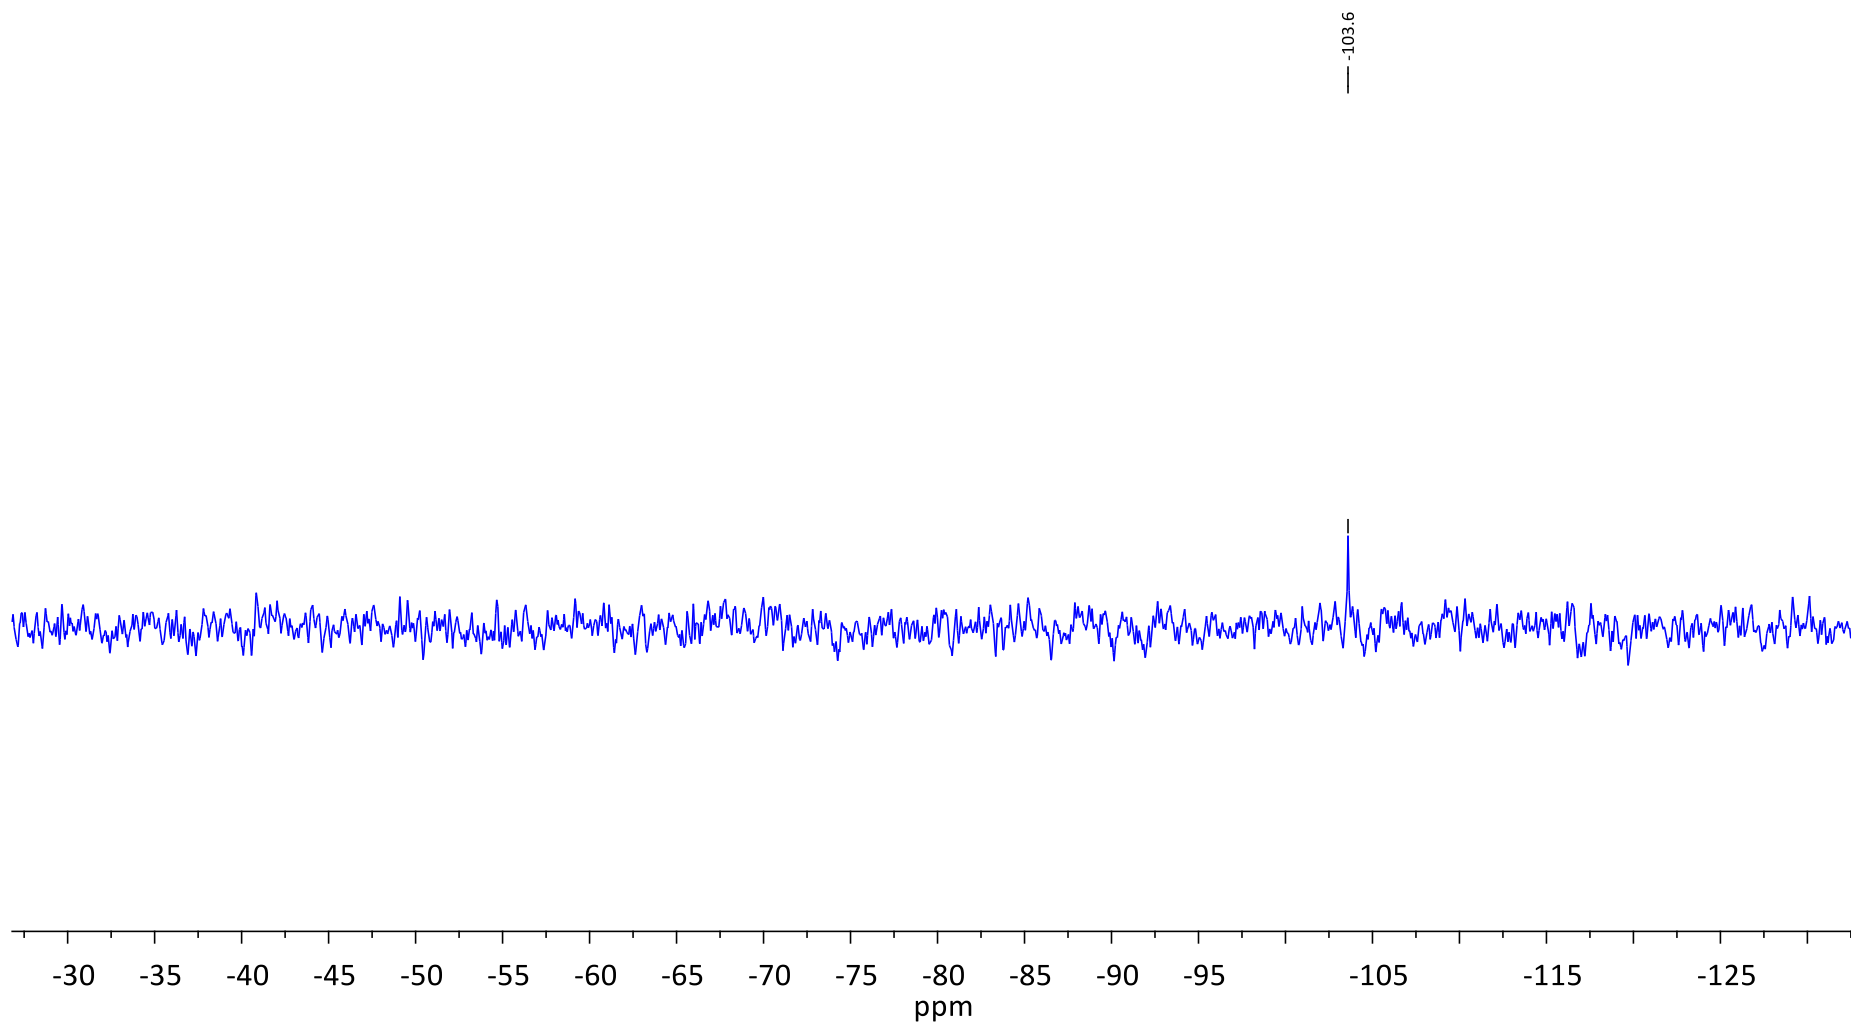

**Fig. S26**  $^{119}\text{Sn}\{^1\text{H},^{11}\text{B}\}$  NMR spectrum of **9** in  $\text{C}_6\text{D}_6$ .

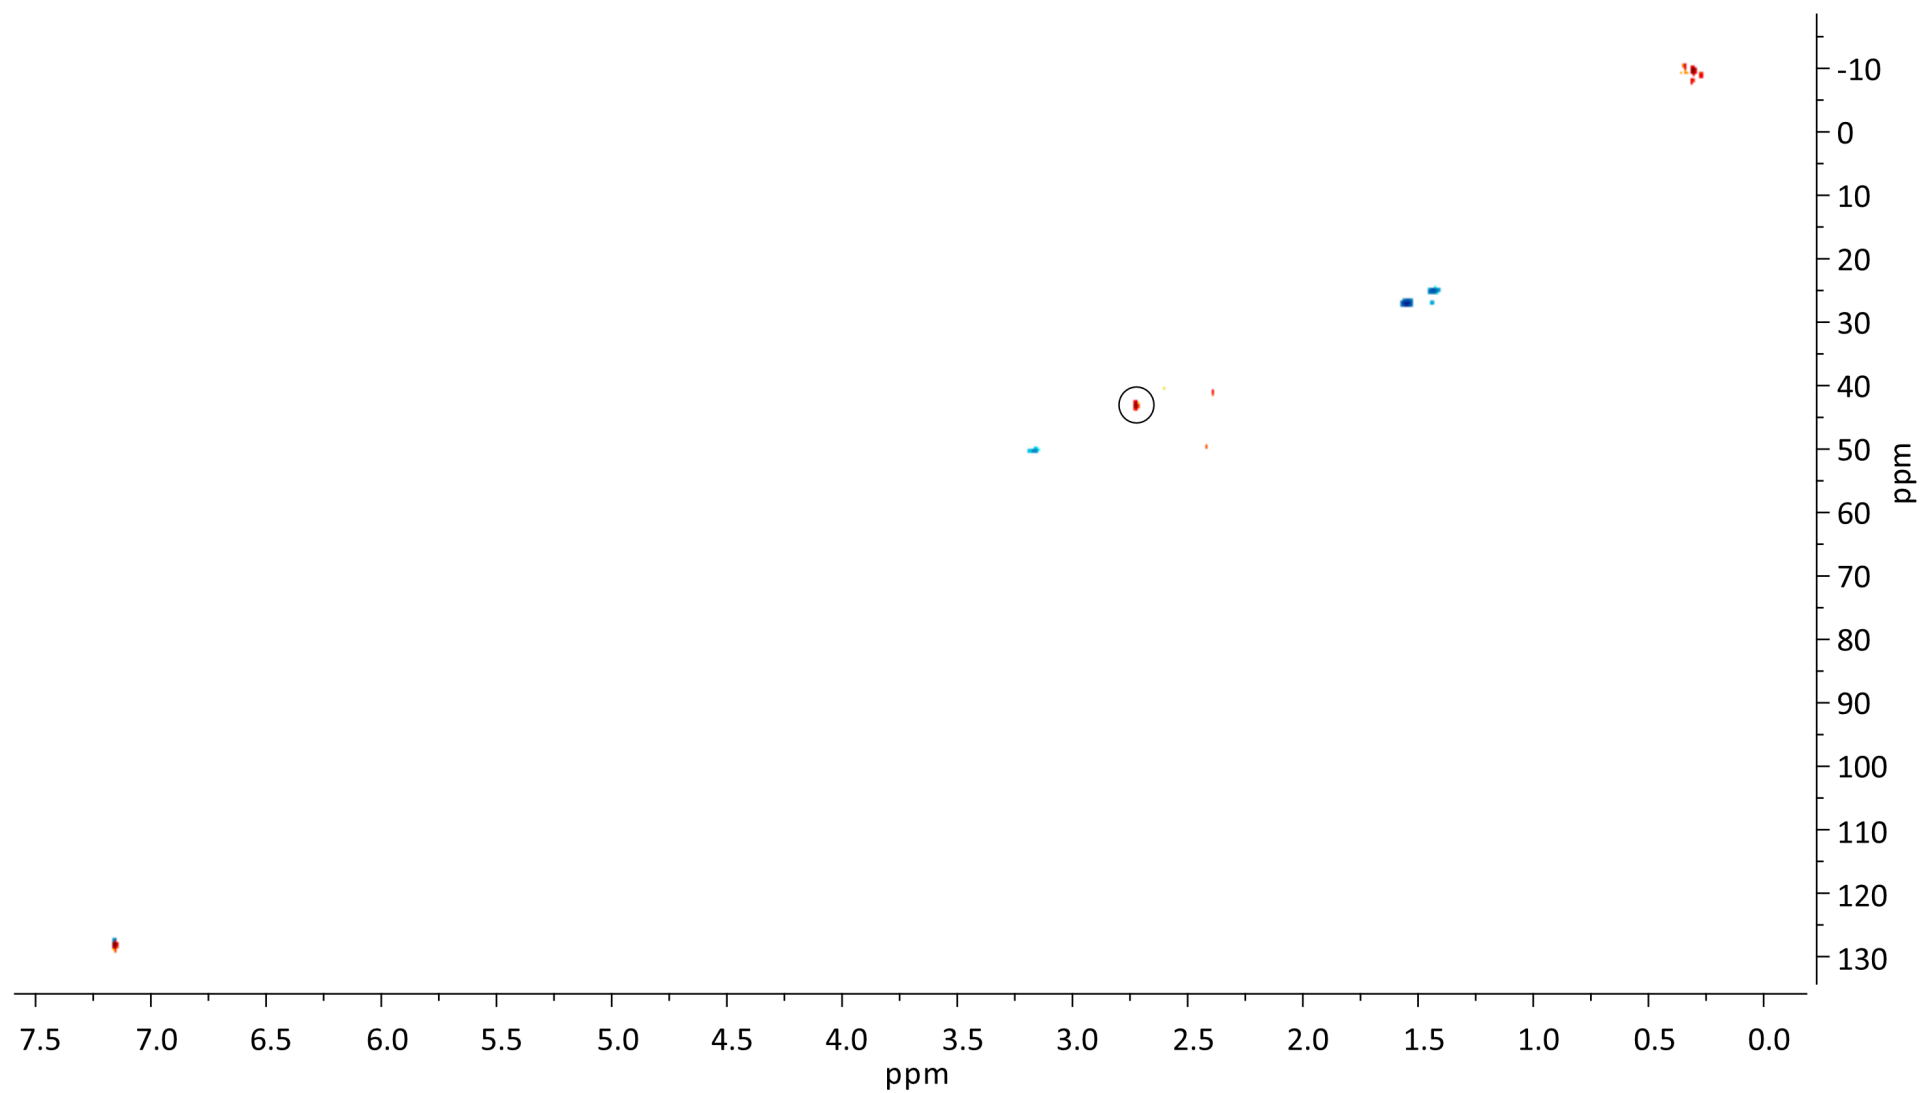

**Fig. S27** HSQC spectrum of **9** in  $\text{C}_6\text{D}_6$  exhibiting the  $^{13}\text{C}$  NMR signal at 43.2 ppm for the  $\text{NMe}_3$  carbons.

## 1.4. X-ray crystallographic data

The crystal data were collected on an *XtaLAB Synergy Dualflex HyPix* diffractometer with a Hybrid Pixel array detector and multi-layer mirror monochromated  $\text{Cu}_{\text{K}\alpha}$  radiation. The structures were solved using the intrinsic phasing method,<sup>50</sup> refined with the ShelXL program<sup>51</sup> and expanded using Fourier techniques. All non-hydrogen atoms were refined anisotropically. Hydrogen atoms were included in structure factor calculations. All hydrogen atoms were assigned to idealised geometric positions.

Crystallographic data have been deposited with the Cambridge Crystallographic Data Centre, and the related CCDC numbers are as follows: 2394530 (**3a**), 2394531 (**3b**), 2394532 (**4a**), 2394533 (**4b**), 2394534 (**5a**), 2394494 (**7**), and 2394535 (**9**). These data can be obtained free of charge from The Cambridge Crystallographic Data Centre via [www.ccdc.cam.ac.uk/data\\_request/cif](http://www.ccdc.cam.ac.uk/data_request/cif).

---

**Crystal data for 3a:**  $\text{C}_{27}\text{H}_{56}\text{BN}_3\text{Sn}_2$ ,  $M_r = 670.93$ , colourless block,  $0.370 \times 0.210 \times 0.120 \text{ mm}^3$ , tetragonal space group  $I4_1cd$ ,  $a = 16.74320(10) \text{ \AA}$ ,  $b = 16.74320(10) \text{ \AA}$ ,  $c = 21.92770(10) \text{ \AA}$ ,  $V = 6147.10(8) \text{ \AA}^3$ ,  $Z = 8$ ,  $\rho_{\text{calcd}} = 1.450 \text{ g}\cdot\text{cm}^{-3}$ ,  $\mu = 13.043 \text{ mm}^{-1}$ ,  $F(000) = 2752$ ,  $T = 100(2) \text{ K}$ ,  $R_1 = 0.0338$ ,  $wR_2 = 0.0989$ , Flack parameter =  $-0.006(10)$ , 2928 independent reflections [ $2\theta \leq 150.598^\circ$ ] and 156 parameters. Some reflections were removed from refinement as outliers.

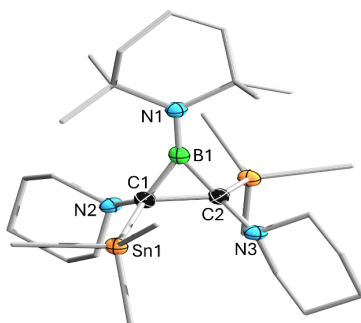

**Fig. S28** Crystallographically-derived solid-state structure of **3a**; atomic displacement ellipsoids drawn at 50% probability level. Ellipsoids of TMP,  $\text{SnMe}_3$  and piperidyl carbon atoms and hydrogen atoms omitted for clarity.

---

**Crystal data for 3b:**  $C_{25}H_{52}BN_3O_2Sn_2$ ,  $M_r = 674.88$ , colourless block,  $0.170 \times 0.160 \times 0.120$  mm<sup>3</sup>, monoclinic space group  $P2_1/n$ ,  $a = 10.04570(10)$  Å,  $b = 16.51580(10)$  Å,  $c = 18.33080(10)$  Å,  $\beta = 98.1740(10)^\circ$ ,  $V = 3010.42(4)$  Å<sup>3</sup>,  $Z = 4$ ,  $\rho_{calcd} = 1.489$  g·cm<sup>-3</sup>,  $\mu = 13.374$  mm<sup>-1</sup>,  $F(000) = 1376$ ,  $T = 100(2)$  K,  $R_1 = 0.0231$ ,  $wR_2 = 0.0553$ , 5902 independent reflections [ $2\theta \leq 149.506^\circ$ ] and 308 parameters.

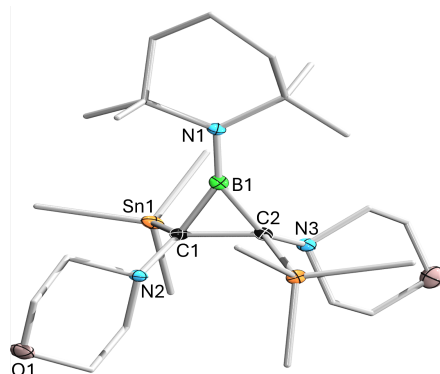

**Fig. S29** Crystallographically-derived solid-state structure of **3b**; atomic displacement ellipsoids drawn at 50% probability level. Ellipsoids of TMP, SnMe<sub>3</sub> and morpholinyl carbon atoms and hydrogen atoms omitted for clarity.

---

**Crystal data for 4a:**  $C_{21}H_{38}BN_3$ ,  $M_r = 343.35$ , colourless plate,  $0.130 \times 0.110 \times 0.050$  mm<sup>3</sup>, monoclinic space group  $P2_1/n$ ,  $a = 12.2086(3)$  Å,  $b = 11.1581(2)$  Å,  $c = 16.0725(3)$  Å,  $\beta = 105.649(2)^\circ$ ,  $V = 2108.31(8)$  Å<sup>3</sup>,  $Z = 4$ ,  $\rho_{calcd} = 1.082$  g·cm<sup>-3</sup>,  $\mu = 0.469$  mm<sup>-1</sup>,  $F(000) = 760$ ,  $T = 100(2)$  K,  $R_1 = 0.0494$ ,  $wR_2 = 0.1107$ , 4080 independent reflections [ $2\theta \leq 146.57^\circ$ ] and 230 parameters

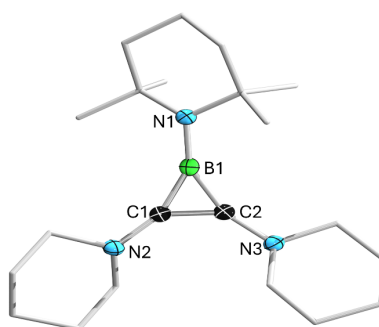

**Fig. S30** Crystallographically-derived solid-state structure of **4a**; atomic displacement ellipsoids drawn at 50% probability level. Ellipsoids of TMP and piperidyl carbon atoms and hydrogen atoms omitted for clarity.

---



**Crystal data for 4b:**  $C_{19}H_{34}BN_3O_2$ ,  $M_r = 347.30$ , colourless plate,  $0.190 \times 0.070 \times 0.020$  mm<sup>3</sup>, orthorhombic space group  $P2_12_12_1$ ,  $a = 6.38220(10)$  Å,  $b = 8.04120(10)$  Å,  $c = 39.2727(6)$  Å,  $V = 2015.50(5)$  Å<sup>3</sup>,  $Z = 4$ ,  $\rho_{calcd} = 1.145$  g·cm<sup>-3</sup>,  $\mu = 0.575$  mm<sup>-1</sup>,  $F(000) = 760$ ,  $T = 100(2)$  K,  $R_1 = 0.0435$ ,  $wR_2 = 0.0931$ , Flack parameter = 0.2(3), 3934 independent reflections [ $2\theta \leq 149.782^\circ$ ] and 231 parameters. Refined as a two-component inversion twin. The BASF parameter was refined to 23.3%.

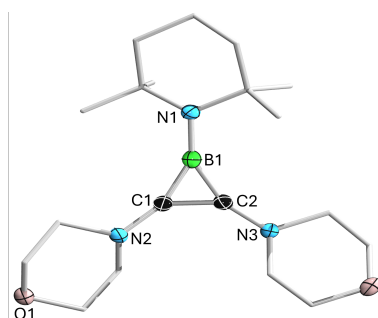

**Fig. S31** Crystallographically-derived solid-state structure of **4b**; atomic displacement ellipsoids drawn at 50% probability level. Ellipsoids of TMP and morpholinyl carbon atoms and hydrogen atoms omitted for clarity.

**Crystal data for 5a:**  $C_{21}H_{38}BN_3$ ,  $M_r = 343.35$ , colourless plate,  $0.210 \times 0.080 \times 0.050$  mm<sup>3</sup>, orthorhombic space group  $Pna2_1$ ,  $a = 18.5782(5)$  Å,  $b = 13.3262(4)$  Å,  $c = 8.4378(2)$  Å,  $V = 2089.00(10)$  Å<sup>3</sup>,  $Z = 4$ ,  $\rho_{calcd} = 1.092$  g·cm<sup>-3</sup>,  $m = 0.474$  mm<sup>-1</sup>,  $F(000) = 760$ ,  $T = 100(2)$  K,  $R_1 = 0.0399$ ,  $wR_2 = 0.0817$ , Flack parameter = 0.1(2), 3968 independent reflections [ $2\theta \leq 146.526^\circ$ ] and 230 parameters.

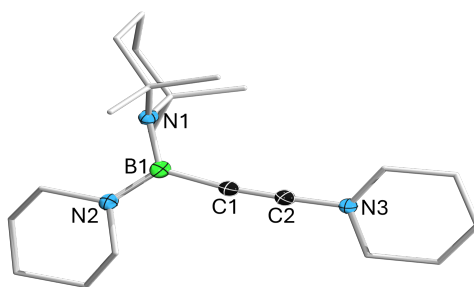

**Fig. S32** Crystallographically-derived solid-state structure of **5a**; atomic displacement ellipsoids drawn at 50% probability level. Ellipsoids of TMP and piperidyl carbon atoms and hydrogen atoms omitted for clarity.

**Crystal data for 7:**  $C_{16}H_{34}BN_3O_2Si_2$ ,  $M_r = 367.45$ , clear pale colourless plate,  $0.140 \times 0.090 \times 0.060$  mm<sup>3</sup>, triclinic space group  $P\bar{1}$ ,  $a = 6.2636(2)$  Å,  $b = 9.1707(3)$  Å,

$c = 18.6096(6) \text{ \AA}$ ,  $\alpha = 91.745(3)^\circ$ ,  $\beta = 91.755(2)^\circ$ ,  $\gamma = 94.665(3)^\circ$ ,  $V = 1064.34(6) \text{ \AA}^3$ ,  $Z = 2$ ,  $\rho_{\text{calcd}} = 1.147 \text{ g}\cdot\text{cm}^{-3}$ ,  $\mu = 1.610 \text{ mm}^{-1}$ ,  $F(000) = 400$ ,  $T = 100(2) \text{ K}$ ,  $R_1 = 0.0647$ ,  $wR_2 = 0.1407$ , 4103 independent reflections [ $2\theta \leq 148.854^\circ$ ] and 278 parameters. One disordered morpholinyl substituent was restrained using keyword ISOR (0.012), SIMU (0.006), RIGU (0.003) and DELU (0.006).

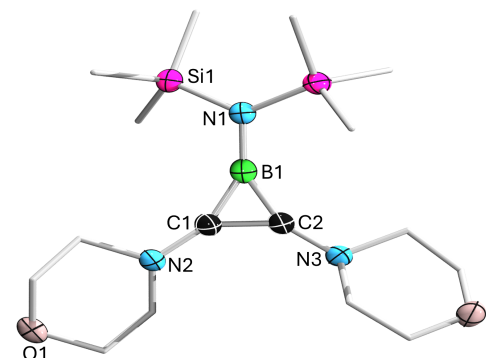

**Fig. S33** Crystallographically-derived solid-state structure of **7**; atomic displacement ellipsoids drawn at 50% probability level. Ellipsoids of SiMe<sub>3</sub> and morpholinyl carbon atoms and hydrogen atoms omitted for clarity.

---

**Crystal data for 9:** C<sub>22</sub>H<sub>50</sub>B<sub>2</sub>N<sub>4</sub>Sn<sub>2</sub>,  $M_r = 629.66$ , yellow block,  $0.300 \times 0.230 \times 0.090 \text{ mm}^3$ , monoclinic space group  $C2/c$ ,  $a = 13.8317(2) \text{ \AA}$ ,  $b = 11.31540(10) \text{ \AA}$ ,  $c = 19.0710(2) \text{ \AA}$ ,  $\beta = 97.6470(10)^\circ$ ,  $V = 2958.28(6) \text{ \AA}^3$ ,  $Z = 4$ ,  $\rho_{\text{calcd}} = 1.414 \text{ g}\cdot\text{cm}^{-3}$ ,  $\mu = 13.519 \text{ mm}^{-1}$ ,  $F(000) = 1280$ ,  $T = 100(2) \text{ K}$ ,  $R_1 = 0.0381$ ,  $wR_2 = 0.1066$ , 2965 independent reflections [ $2\theta \leq 149.66^\circ$ ] and 141 parameters.

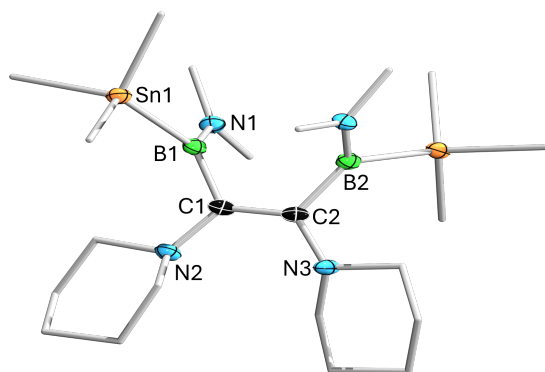

**Fig. S34** Crystallographically-derived solid-state structure of **9**; atomic displacement ellipsoids drawn at 50% probability level. Ellipsoids of NMe<sub>2</sub>, SnMe<sub>3</sub> and piperidyl carbon atoms and hydrogen atoms omitted for clarity.

---

## 2. Computational details

All molecules were fully optimised using the Gaussian 16, Rev. C.01<sup>52</sup> quantum chemistry program package at the  $\omega$ B97X-D<sup>53</sup>/Def2-SVP level of theory. The model compounds were fully optimised in gaseous state (no solvent effect) starting from the X-ray crystallographic coordinates. Frequency calculations were performed at the same level of theory to verify the nature of the stationary states and the absence of any imaginary frequency to confirm that all structures represent minima on the potential energy hypersurface. Natural bonding analyses were performed with the natural bond orbital (NBO 7.0) partitioning scheme as implemented in the Gaussian 16 suite of programs.<sup>54-56</sup> Natural charges were obtained from a natural bond orbital analysis. To analyse the bonding situation, the Wiberg bond indices (WBI)<sup>57</sup> were obtained from NBO analysis and using the Multiwfn V.3.8 package.<sup>58</sup> In order to understand the nature of bonding in the synthesised molecules in greater detail, the QTAIM analysis<sup>59,60</sup> was carried out utilising the Multiwfn V.3.8 package<sup>58</sup> whereas the wavefunctions were generated with Gaussian16 at the same level of theory as for geometry optimisation. The nucleus-independent chemical shift (NICS) values were calculated by computing NMR shielding (NMR = GIAO)<sup>61,62</sup> of a ghost atom placed at the center of the ring and then displaced above and below the plane of ring in intervals of 1 Å. Pictures of MOs, and NBOs were generated by means of the ChemCraft1.8 program.<sup>63</sup>

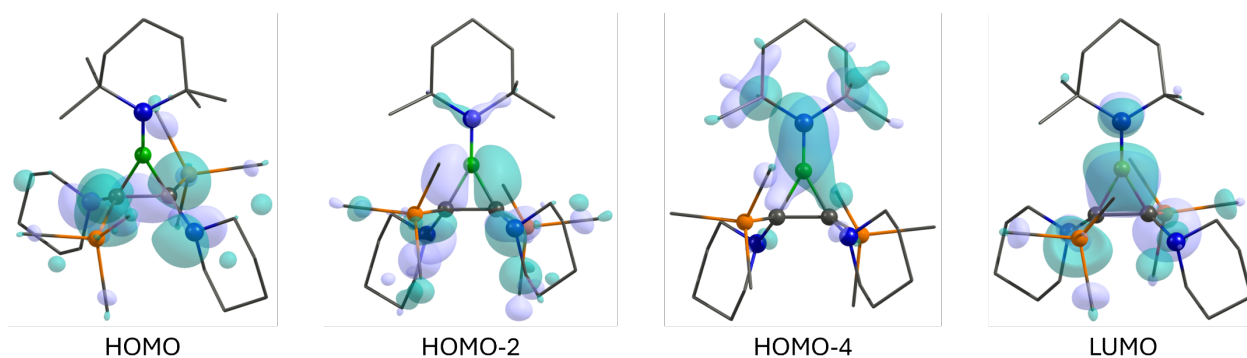

**Fig. S35** Selected molecular orbitals of **3a** (isosurface plot at 0.04 a.u.).

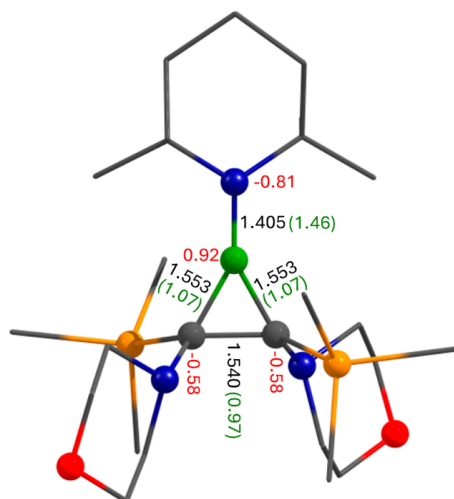

**Fig. S36** Optimised geometry of **3b**. Interatomic distances (in Å), WBIs, and natural charges are given in black, green and red, respectively.

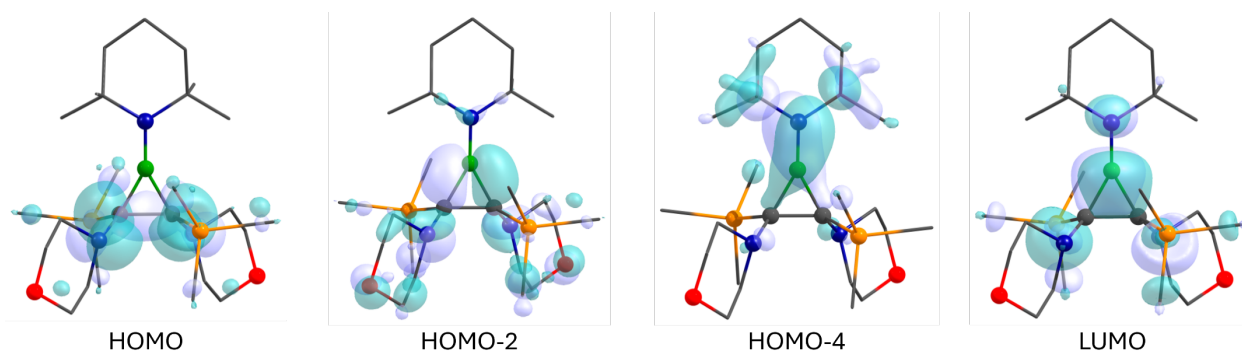

**Fig. S37** Selected molecular orbitals of **3b** (isosurface plot at 0.04 a.u.).

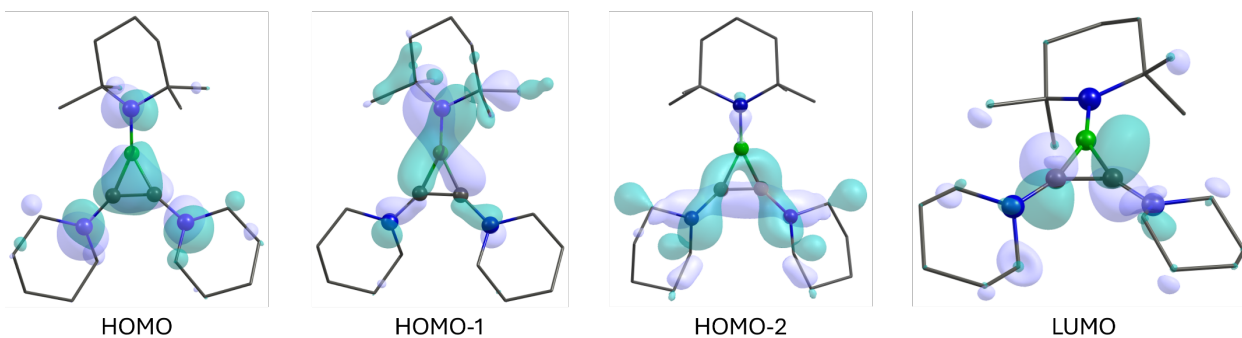

**Fig. S38** Selected molecular orbitals of **4a** (isosurface plot at 0.04 a.u.).

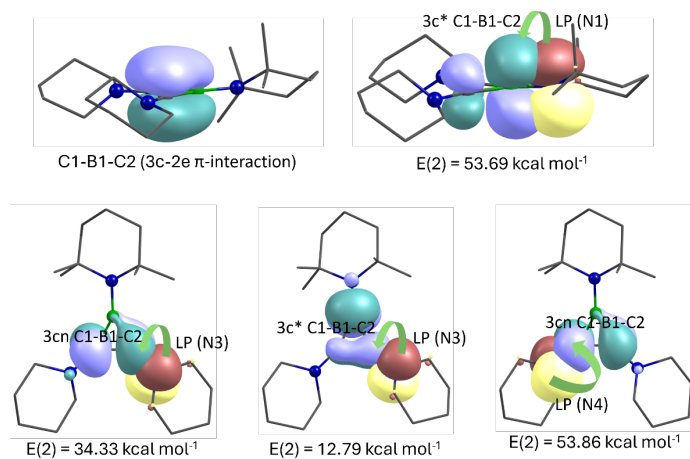

**Fig. S39** Selected natural bonding orbitals (NBOs) of **4a** (isosurface plot at 0.04 a.u.).

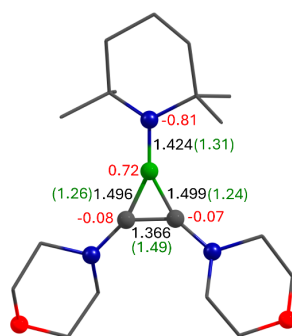

**Fig. S40** Optimised geometry of **4b**. Interatomic distances (in Å), WBIs, and natural charges are given in black, green and red, respectively.

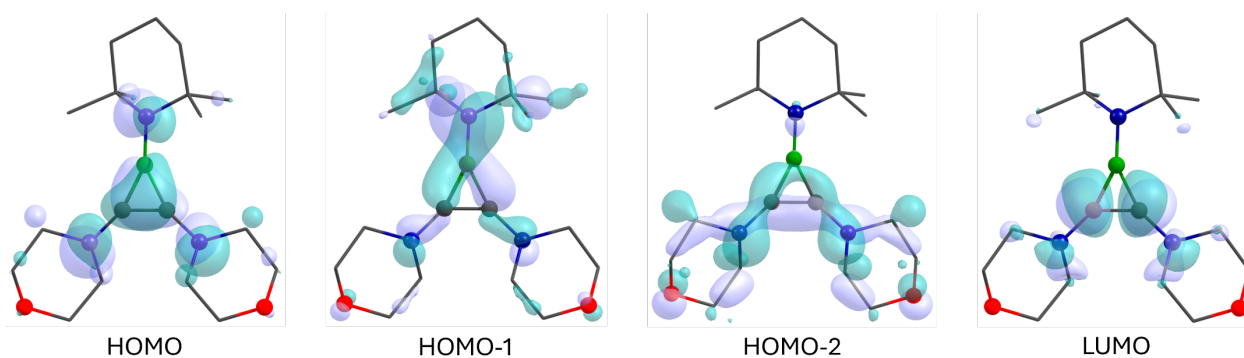

**Fig. S41** Selected molecular orbitals of **4b** (isosurface plot at 0.04 a.u.).

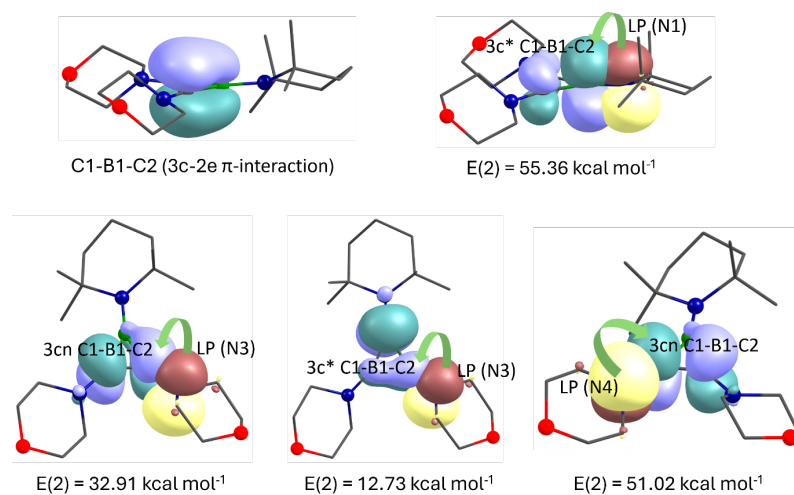

**Fig. S42** Selected natural bonding orbitals (NBOs) of **4b** (isosurface plot at 0.04 a.u.).

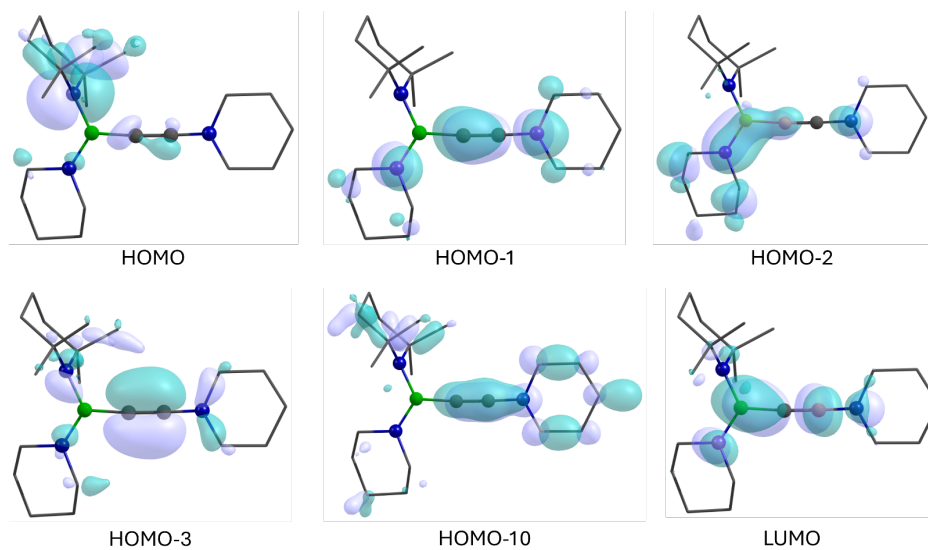

**Fig. S43** Selected molecular orbitals of **5a** (isosurface plot at 0.04 a.u.).

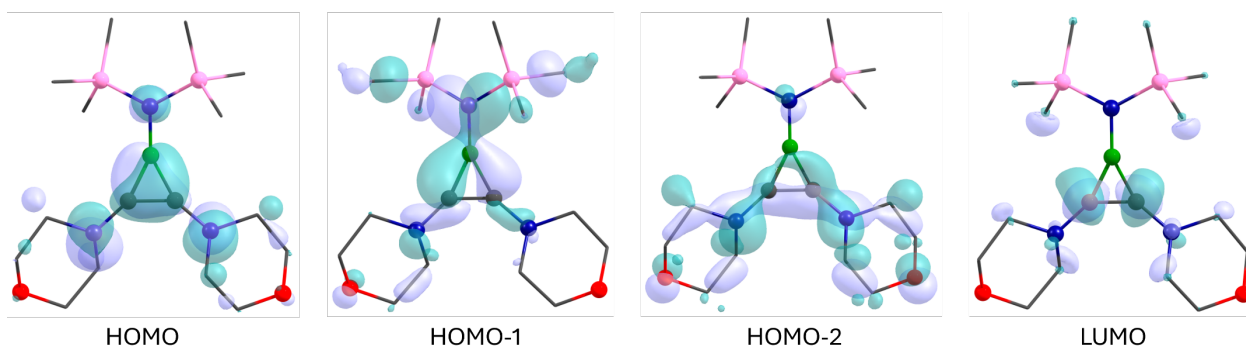

**Fig. S44** Selected molecular orbitals of **7** (isosurface plot at 0.04 a.u.).

**Table S1.** NICS values of triaminoborirenes **4a,b** and **7**. NICS isotropic values are an average of the NICS value in the plane of the ring and out of the plane of the ring. NICS<sub>zz</sub> quantifies the out-of-plane aromaticity. NICS(1.0) and NICS(-1.0) are the NICS values at 1.0 Å above and below the perpendicular plane of the {BC<sub>2</sub>} triangular ring, respectively, as shown at right.

|                           | <b>4a</b> | <b>4b</b> | <b>7</b> |
|---------------------------|-----------|-----------|----------|
| NICS (0.0)                | -29.7     | -29.6     | -29.8    |
| NICS <sub>zz</sub> (0.0)  | -15.6     | -15.9     | -15.5    |
| NICS (1.0)                | -11.6     | -11.7     | -11.5    |
| NICS <sub>zz</sub> (1.0)  | -12.2     | -12.7     | -12.6    |
| NICS (-1.0)               | -11.3     | -11.4     | -11.4    |
| NICS <sub>zz</sub> (-1.0) | -12.5     | -12.8     | -12.2    |

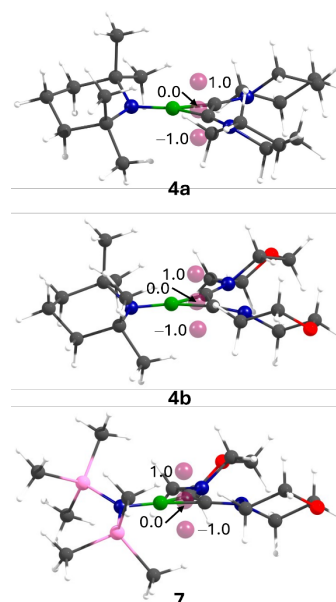

## Coordinates of Optimised Geometries

Compound 3a,  $\omega$ B97X-D/Def2-SVP

Energy = -1679.242535 Eh

Imaginary frequency = 0

|    |                 |                 |                 |
|----|-----------------|-----------------|-----------------|
| C  | -0.111589000000 | 0.762098000000  | -0.353463000000 |
| B  | 0.000000000000  | 0.000000000000  | 0.996004000000  |
| N  | 0.000000000000  | 0.000000000000  | 2.403409000000  |
| C  | 0.000000000000  | 1.280397000000  | 3.189898000000  |
| C  | -0.654263000000 | 1.076437000000  | 4.568822000000  |
| H  | -1.716938000000 | 0.842969000000  | 4.403670000000  |
| H  | -0.641339000000 | 2.045102000000  | 5.090585000000  |
| C  | 0.000000000000  | 0.000000000000  | 5.432828000000  |
| C  | -0.841068000000 | 2.352722000000  | 2.494616000000  |
| H  | -1.871269000000 | 1.998730000000  | 2.348127000000  |
| H  | -0.435977000000 | 2.642491000000  | 1.523850000000  |
| H  | -0.880764000000 | 3.253652000000  | 3.124493000000  |
| C  | 1.437229000000  | 1.798285000000  | 3.367790000000  |
| H  | 1.432928000000  | 2.788067000000  | 3.849709000000  |
| H  | 1.940116000000  | 1.890278000000  | 2.397022000000  |
| H  | 2.049970000000  | 1.128007000000  | 3.984284000000  |
| N  | 0.845773000000  | 1.614061000000  | -1.031239000000 |
| C  | 1.230888000000  | 2.825515000000  | -0.328714000000 |
| H  | 1.507458000000  | 2.551373000000  | 0.695139000000  |
| H  | 0.379024000000  | 3.539791000000  | -0.254619000000 |
| C  | 2.400267000000  | 3.532296000000  | -1.004729000000 |
| H  | 2.649309000000  | 4.443442000000  | -0.438377000000 |
| H  | 3.285100000000  | 2.873985000000  | -0.968913000000 |
| C  | 2.069195000000  | 3.861075000000  | -2.456203000000 |
| H  | 2.929310000000  | 4.325622000000  | -2.962861000000 |
| H  | 1.246546000000  | 4.598037000000  | -2.483983000000 |
| C  | 1.638262000000  | 2.587748000000  | -3.175587000000 |
| H  | 1.301033000000  | 2.806450000000  | -4.200910000000 |
| H  | 2.497732000000  | 1.905182000000  | -3.256279000000 |
| C  | 0.514344000000  | 1.884480000000  | -2.422947000000 |
| H  | -0.404058000000 | 2.513057000000  | -2.494526000000 |
| H  | 0.277092000000  | 0.931019000000  | -2.914457000000 |
| Sn | -2.263525000000 | 1.144704000000  | -0.693407000000 |
| C  | -2.665930000000 | 3.265802000000  | -0.445546000000 |
| H  | -3.737608000000 | 3.453122000000  | -0.617257000000 |
| H  | -2.097408000000 | 3.847500000000  | -1.187257000000 |
| H  | -2.407181000000 | 3.636600000000  | 0.555607000000  |
| C  | -2.968693000000 | 0.749001000000  | -2.700105000000 |
| H  | -3.417844000000 | 1.664600000000  | -3.113492000000 |
| H  | -3.733874000000 | -0.040831000000 | -2.687972000000 |



|    |                 |                 |                 |
|----|-----------------|-----------------|-----------------|
| H  | -2.153060000000 | 0.433459000000  | -3.364827000000 |
| C  | -3.490744000000 | 0.062418000000  | 0.713911000000  |
| H  | -3.113554000000 | 0.175055000000  | 1.740262000000  |
| H  | -3.486504000000 | -1.007102000000 | 0.459619000000  |
| H  | -4.527284000000 | 0.429787000000  | 0.679033000000  |
| C  | 0.111589000000  | -0.762098000000 | -0.353463000000 |
| C  | 0.000000000000  | -1.280397000000 | 3.189898000000  |
| C  | 0.654263000000  | -1.076437000000 | 4.568822000000  |
| H  | 1.716938000000  | -0.842969000000 | 4.403670000000  |
| H  | 0.641339000000  | -2.045102000000 | 5.090585000000  |
| C  | 0.841068000000  | -2.352722000000 | 2.494616000000  |
| H  | 1.871269000000  | -1.998730000000 | 2.348127000000  |
| H  | 0.435977000000  | -2.642491000000 | 1.523850000000  |
| H  | 0.880764000000  | -3.253652000000 | 3.124493000000  |
| C  | -1.437229000000 | -1.798285000000 | 3.367790000000  |
| H  | -1.432928000000 | -2.788067000000 | 3.849709000000  |
| H  | -1.940116000000 | -1.890278000000 | 2.397022000000  |
| H  | -2.049970000000 | -1.128007000000 | 3.984284000000  |
| N  | -0.845773000000 | -1.614061000000 | -1.031239000000 |
| C  | -1.230888000000 | -2.825515000000 | -0.328714000000 |
| H  | -1.507458000000 | -2.551373000000 | 0.695139000000  |
| H  | -0.379024000000 | -3.539791000000 | -0.254619000000 |
| C  | -2.400267000000 | -3.532296000000 | -1.004729000000 |
| H  | -2.649309000000 | -4.443442000000 | -0.438377000000 |
| H  | -3.285100000000 | -2.873985000000 | -0.968913000000 |
| C  | -2.069195000000 | -3.861075000000 | -2.456203000000 |
| H  | -2.929310000000 | -4.325622000000 | -2.962861000000 |
| H  | -1.246546000000 | -4.598037000000 | -2.483983000000 |
| C  | -1.638262000000 | -2.587748000000 | -3.175587000000 |
| H  | -1.301033000000 | -2.806450000000 | -4.200910000000 |
| H  | -2.497732000000 | -1.905182000000 | -3.256279000000 |
| C  | -0.514344000000 | -1.884480000000 | -2.422947000000 |
| H  | 0.404058000000  | -2.513057000000 | -2.494526000000 |
| H  | -0.277092000000 | -0.931019000000 | -2.914457000000 |
| Sn | 2.263525000000  | -1.144704000000 | -0.693407000000 |
| C  | 2.665930000000  | -3.265802000000 | -0.445546000000 |
| H  | 3.737608000000  | -3.453122000000 | -0.617257000000 |
| H  | 2.097408000000  | -3.847500000000 | -1.187257000000 |
| H  | 2.407181000000  | -3.636600000000 | 0.555607000000  |
| C  | 2.968693000000  | -0.749001000000 | -2.700105000000 |
| H  | 3.417844000000  | -1.664600000000 | -3.113492000000 |
| H  | 3.733874000000  | 0.040831000000  | -2.687972000000 |
| H  | 2.153060000000  | -0.433459000000 | -3.364827000000 |
| C  | 3.490744000000  | -0.062418000000 | 0.713911000000  |
| H  | 3.113554000000  | -0.175055000000 | 1.740262000000  |
| H  | 3.486504000000  | 1.007102000000  | 0.459619000000  |

|   |                 |                 |                |
|---|-----------------|-----------------|----------------|
| H | 4.527284000000  | -0.429787000000 | 0.679033000000 |
| H | -0.757990000000 | -0.443272000000 | 6.096477000000 |
| H | 0.757990000000  | 0.443272000000  | 6.096477000000 |

**Compound 3b,  $\omega$ B97X-D/Def2-SVP**

**Energy = -1750.935484 Eh**

**Imaginary frequency = 0**

|   |                 |                 |                 |
|---|-----------------|-----------------|-----------------|
| B | 0.997695000000  | -0.000071000000 | -0.000047000000 |
| C | -0.351073000000 | 0.591199000000  | 0.493687000000  |
| C | -0.351183000000 | -0.591181000000 | -0.493687000000 |
| N | 2.403310000000  | -0.000110000000 | -0.000119000000 |
| C | 3.188458000000  | 0.848163000000  | 0.959611000000  |
| C | 4.567863000000  | 1.202683000000  | 0.374778000000  |
| H | 4.403273000000  | 1.845496000000  | -0.503183000000 |
| H | 5.089821000000  | 1.833422000000  | 1.109864000000  |
| C | 5.431360000000  | -0.000280000000 | -0.000152000000 |
| H | 6.094881000000  | -0.275958000000 | 0.833562000000  |
| H | 6.095006000000  | 0.275318000000  | -0.833791000000 |
| C | 4.567731000000  | -1.203138000000 | -0.375135000000 |
| H | 4.403146000000  | -1.846001000000 | 0.502792000000  |
| H | 5.089576000000  | -1.833871000000 | -1.110307000000 |
| C | 3.188322000000  | -0.848474000000 | -0.959870000000 |
| C | 3.360795000000  | 0.113769000000  | 2.299482000000  |
| H | 2.386598000000  | -0.196434000000 | 2.698307000000  |
| H | 3.844816000000  | 0.769488000000  | 3.039443000000  |
| H | 3.971942000000  | -0.793018000000 | 2.203985000000  |
| C | 2.491837000000  | 2.187752000000  | 1.205344000000  |
| H | 1.521205000000  | 2.074490000000  | 1.690855000000  |
| H | 2.344168000000  | 2.724980000000  | 0.257829000000  |
| H | 3.120575000000  | 2.815324000000  | 1.853915000000  |
| C | 2.491527000000  | -2.187988000000 | -1.205529000000 |
| H | 2.343831000000  | -2.725162000000 | -0.257986000000 |
| H | 3.120146000000  | -2.815668000000 | -1.854112000000 |
| H | 1.520890000000  | -2.074599000000 | -1.690996000000 |
| C | 3.360663000000  | -0.114124000000 | -2.299768000000 |
| H | 2.386484000000  | 0.196216000000  | -2.698524000000 |
| H | 3.844531000000  | -0.769928000000 | -3.039754000000 |
| H | 3.971959000000  | 0.792568000000  | -2.204328000000 |
| N | -1.025526000000 | 0.435506000000  | 1.766292000000  |
| C | -0.349367000000 | 0.969679000000  | 2.933953000000  |
| H | -0.270559000000 | 2.077853000000  | 2.894802000000  |
| H | 0.668189000000  | 0.563032000000  | 2.976687000000  |
| C | -1.092839000000 | 0.586521000000  | 4.204516000000  |
| H | -1.060947000000 | -0.515701000000 | 4.328789000000  |

|    |                 |                 |                 |
|----|-----------------|-----------------|-----------------|
| H  | -0.611615000000 | 1.045980000000  | 5.079597000000  |
| O  | -2.421624000000 | 1.032856000000  | 4.176264000000  |
| C  | -3.103698000000 | 0.492261000000  | 3.075998000000  |
| H  | -4.124839000000 | 0.898823000000  | 3.091550000000  |
| H  | -3.166848000000 | -0.608410000000 | 3.169099000000  |
| C  | -2.419312000000 | 0.849759000000  | 1.764749000000  |
| H  | -2.944230000000 | 0.356893000000  | 0.934245000000  |
| H  | -2.513689000000 | 1.947855000000  | 1.610383000000  |
| N  | -1.025784000000 | -0.435408000000 | -1.766196000000 |
| C  | -0.349804000000 | -0.969532000000 | -2.933982000000 |
| H  | -0.271009000000 | -2.077708000000 | -2.894907000000 |
| H  | 0.667752000000  | -0.562895000000 | -2.976839000000 |
| C  | -1.093454000000 | -0.586274000000 | -4.204410000000 |
| H  | -1.061531000000 | 0.515957000000  | -4.328621000000 |
| H  | -0.612382000000 | -1.045697000000 | -5.079592000000 |
| O  | -2.422251000000 | -1.032553000000 | -4.175991000000 |
| C  | -3.104155000000 | -0.492002000000 | -3.075599000000 |
| H  | -4.125306000000 | -0.898543000000 | -3.091026000000 |
| H  | -3.167302000000 | 0.608672000000  | -3.168630000000 |
| C  | -2.419593000000 | -0.849580000000 | -1.764466000000 |
| H  | -2.944358000000 | -0.356715000000 | -0.933866000000 |
| H  | -2.514014000000 | -1.947672000000 | -1.610118000000 |
| Sn | -0.696633000000 | 2.459792000000  | -0.638693000000 |
| C  | -0.446471000000 | 4.159274000000  | 0.688219000000  |
| H  | -1.182559000000 | 4.114748000000  | 1.505360000000  |
| H  | -0.624045000000 | 5.087251000000  | 0.122403000000  |
| H  | 0.557780000000  | 4.211944000000  | 1.130302000000  |
| C  | -2.706864000000 | 2.720196000000  | -1.396297000000 |
| H  | -3.373303000000 | 1.902816000000  | -1.088786000000 |
| H  | -2.698439000000 | 2.769078000000  | -2.494907000000 |
| H  | -3.118701000000 | 3.663983000000  | -1.008392000000 |
| C  | 0.702858000000  | 2.658328000000  | -2.268543000000 |
| H  | 0.430920000000  | 1.960602000000  | -3.073498000000 |
| H  | 1.727734000000  | 2.429787000000  | -1.943480000000 |
| H  | 0.681997000000  | 3.683188000000  | -2.668068000000 |
| Sn | -0.696866000000 | -2.459746000000 | 0.638725000000  |
| C  | 0.702775000000  | -2.658523000000 | 2.268421000000  |
| H  | 0.430907000000  | -1.960925000000 | 3.073510000000  |
| H  | 1.727631000000  | -2.429952000000 | 1.943316000000  |
| H  | 0.681924000000  | -3.683449000000 | 2.667778000000  |
| C  | -0.447105000000 | -4.159186000000 | -0.688310000000 |
| H  | -0.624434000000 | -5.087237000000 | -0.122545000000 |
| H  | 0.556994000000  | -4.211761000000 | -1.130748000000 |
| H  | -1.183476000000 | -4.114601000000 | -1.505194000000 |
| C  | -2.707051000000 | -2.719869000000 | 1.396554000000  |
| H  | -2.698426000000 | -2.769093000000 | 2.495152000000  |

|   |                 |                 |                |
|---|-----------------|-----------------|----------------|
| H | -3.119193000000 | -3.663436000000 | 1.008438000000 |
| H | -3.373343000000 | -1.902232000000 | 1.089431000000 |

**Compound 4a,  $\omega$ B97X-D/Def2-SVP**

**Energy = -1011.253156 Eh**

**Imaginary frequency = 0**

|   |                 |                 |                 |
|---|-----------------|-----------------|-----------------|
| B | 0.692593000000  | -0.112675000000 | -0.157096000000 |
| C | -0.678123000000 | -0.706063000000 | -0.122139000000 |
| C | -0.590746000000 | 0.659321000000  | -0.093245000000 |
| N | 2.118068000000  | -0.168261000000 | -0.203816000000 |
| C | 2.800377000000  | -1.331106000000 | 0.419653000000  |
| C | 4.245913000000  | -1.468612000000 | -0.090710000000 |
| H | 4.746165000000  | -2.257326000000 | 0.493520000000  |
| H | 4.211885000000  | -1.820287000000 | -1.136407000000 |
| C | 5.030258000000  | -0.169970000000 | -0.043703000000 |
| H | 5.151001000000  | 0.177515000000  | 0.995717000000  |
| H | 6.047525000000  | -0.321893000000 | -0.437022000000 |
| C | 4.292298000000  | 0.860557000000  | -0.878470000000 |
| H | 4.268272000000  | 0.506874000000  | -1.923506000000 |
| H | 4.824146000000  | 1.825443000000  | -0.883503000000 |
| C | 2.843094000000  | 1.111960000000  | -0.419718000000 |
| C | 2.790951000000  | -1.221567000000 | 1.957689000000  |
| H | 3.398916000000  | -0.383445000000 | 2.323502000000  |
| H | 3.182868000000  | -2.143068000000 | 2.416441000000  |
| H | 1.761068000000  | -1.070801000000 | 2.315842000000  |
| C | 2.071028000000  | -2.624995000000 | 0.040831000000  |
| H | 1.097998000000  | -2.700388000000 | 0.539387000000  |
| H | 2.674593000000  | -3.493209000000 | 0.346146000000  |
| H | 1.910819000000  | -2.674132000000 | -1.046471000000 |
| C | 2.841157000000  | 1.988430000000  | 0.847762000000  |
| H | 3.196876000000  | 3.005617000000  | 0.620602000000  |
| H | 3.487047000000  | 1.580601000000  | 1.637193000000  |
| H | 1.822842000000  | 2.059892000000  | 1.256440000000  |
| C | 2.163914000000  | 1.889050000000  | -1.557441000000 |
| H | 1.161827000000  | 2.235309000000  | -1.281928000000 |
| H | 2.071484000000  | 1.251409000000  | -2.449093000000 |
| H | 2.768478000000  | 2.770736000000  | -1.820064000000 |
| N | -1.688467000000 | -1.638688000000 | -0.107420000000 |
| C | -1.397513000000 | -3.028619000000 | -0.400497000000 |
| H | -1.050519000000 | -3.566623000000 | 0.509572000000  |
| H | -0.579919000000 | -3.065642000000 | -1.132158000000 |
| C | -2.641572000000 | -3.725307000000 | -0.947162000000 |
| H | -2.421085000000 | -4.789309000000 | -1.126937000000 |
| H | -2.896987000000 | -3.274514000000 | -1.920921000000 |

|   |                 |                 |                 |
|---|-----------------|-----------------|-----------------|
| C | -3.822270000000 | -3.573551000000 | 0.012225000000  |
| H | -3.604486000000 | -4.126571000000 | 0.943738000000  |
| H | -4.731105000000 | -4.024758000000 | -0.415542000000 |
| C | -4.057822000000 | -2.101415000000 | 0.351115000000  |
| H | -4.404281000000 | -1.564551000000 | -0.548723000000 |
| H | -4.844749000000 | -1.997905000000 | 1.114893000000  |
| C | -2.770435000000 | -1.452131000000 | 0.847478000000  |
| H | -2.908692000000 | -0.377001000000 | 1.025581000000  |
| H | -2.491176000000 | -1.897351000000 | 1.827746000000  |
| N | -1.450504000000 | 1.721085000000  | -0.058165000000 |
| C | -0.957759000000 | 3.072915000000  | 0.121786000000  |
| H | -0.736890000000 | 3.548223000000  | -0.858753000000 |
| H | -0.014747000000 | 3.029879000000  | 0.681736000000  |
| C | -1.990861000000 | 3.918316000000  | 0.864144000000  |
| H | -1.626504000000 | 4.953572000000  | 0.956446000000  |
| H | -2.103471000000 | 3.517949000000  | 1.885728000000  |
| C | -3.341941000000 | 3.884043000000  | 0.148182000000  |
| H | -4.098402000000 | 4.442914000000  | 0.720811000000  |
| H | -3.246085000000 | 4.393717000000  | -0.827534000000 |
| C | -3.797704000000 | 2.443107000000  | -0.086431000000 |
| H | -4.024969000000 | 1.963469000000  | 0.881193000000  |
| H | -4.721436000000 | 2.419709000000  | -0.685969000000 |
| C | -2.705834000000 | 1.642562000000  | -0.789039000000 |
| H | -2.987939000000 | 0.587645000000  | -0.903319000000 |
| H | -2.565474000000 | 2.041173000000  | -1.816960000000 |

**Compound 4b,  $\omega$ B97X-D/Def2-SVP**

**Energy = -1082.943505 Eh**

**Imaginary frequency = 0**

|   |                 |                 |                 |
|---|-----------------|-----------------|-----------------|
| B | 0.682085000000  | -0.105863000000 | -0.160787000000 |
| C | -0.689169000000 | -0.703568000000 | -0.135363000000 |
| C | -0.605222000000 | 0.658660000000  | -0.072373000000 |
| N | 2.104969000000  | -0.154731000000 | -0.210137000000 |
| C | 2.790844000000  | -1.345267000000 | 0.357267000000  |
| C | 4.242291000000  | -1.446499000000 | -0.144159000000 |
| H | 4.741584000000  | -2.259986000000 | 0.405670000000  |
| H | 4.222469000000  | -1.746148000000 | -1.206271000000 |
| C | 5.016282000000  | -0.146573000000 | -0.024310000000 |
| H | 5.121156000000  | 0.152121000000  | 1.031774000000  |
| H | 6.039460000000  | -0.272606000000 | -0.411070000000 |
| C | 4.281075000000  | 0.915926000000  | -0.820068000000 |
| H | 4.272517000000  | 0.609834000000  | -1.880205000000 |
| H | 4.805660000000  | 1.883614000000  | -0.775359000000 |
| C | 2.824959000000  | 1.138031000000  | -0.368561000000 |

|   |                 |                 |                 |
|---|-----------------|-----------------|-----------------|
| C | 2.765410000000  | -1.314732000000 | 1.898307000000  |
| H | 1.730644000000  | -1.195143000000 | 2.254226000000  |
| H | 3.359278000000  | -0.488448000000 | 2.311424000000  |
| H | 3.164793000000  | -2.253340000000 | 2.313615000000  |
| C | 2.074562000000  | -2.621811000000 | -0.097771000000 |
| H | 1.099538000000  | -2.732168000000 | 0.389404000000  |
| H | 2.682355000000  | -3.501046000000 | 0.164159000000  |
| H | 1.922650000000  | -2.612556000000 | -1.187414000000 |
| C | 2.801137000000  | 1.961127000000  | 0.933469000000  |
| H | 3.167109000000  | 2.984513000000  | 0.756277000000  |
| H | 3.427759000000  | 1.516004000000  | 1.718319000000  |
| H | 1.774736000000  | 2.022237000000  | 1.323509000000  |
| C | 2.153568000000  | 1.954923000000  | -1.482421000000 |
| H | 1.145853000000  | 2.282863000000  | -1.205770000000 |
| H | 2.077068000000  | 1.353360000000  | -2.400208000000 |
| H | 2.753865000000  | 2.851053000000  | -1.701990000000 |
| N | -1.701075000000 | -1.635503000000 | -0.137243000000 |
| C | -1.413332000000 | -3.026365000000 | -0.427531000000 |
| H | -1.007483000000 | -3.553935000000 | 0.460989000000  |
| H | -0.664175000000 | -3.081921000000 | -1.229031000000 |
| C | -2.698918000000 | -3.716884000000 | -0.863503000000 |
| H | -3.033178000000 | -3.281919000000 | -1.827306000000 |
| H | -2.530442000000 | -4.793436000000 | -1.007625000000 |
| O | -3.707537000000 | -3.583969000000 | 0.105894000000  |
| C | -4.002012000000 | -2.238635000000 | 0.377620000000  |
| H | -4.778360000000 | -2.228039000000 | 1.155974000000  |
| H | -4.410217000000 | -1.744117000000 | -0.528285000000 |
| C | -2.764794000000 | -1.485789000000 | 0.843778000000  |
| H | -2.989892000000 | -0.420073000000 | 0.990625000000  |
| H | -2.444115000000 | -1.889498000000 | 1.826857000000  |
| N | -1.474540000000 | 1.713785000000  | -0.005265000000 |
| C | -0.991026000000 | 3.067357000000  | 0.185333000000  |
| H | -0.693385000000 | 3.531685000000  | -0.777362000000 |
| H | -0.110647000000 | 3.050646000000  | 0.841812000000  |
| C | -2.099684000000 | 3.904255000000  | 0.811080000000  |
| H | -2.306650000000 | 3.523820000000  | 1.832009000000  |
| H | -1.794811000000 | 4.957535000000  | 0.887304000000  |
| O | -3.268607000000 | 3.869325000000  | 0.032017000000  |
| C | -3.750382000000 | 2.561630000000  | -0.141188000000 |
| H | -4.646161000000 | 2.628678000000  | -0.774958000000 |
| H | -4.046938000000 | 2.128846000000  | 0.836810000000  |
| C | -2.700806000000 | 1.668372000000  | -0.785991000000 |
| H | -3.057154000000 | 0.631855000000  | -0.860384000000 |
| H | -2.510332000000 | 2.022358000000  | -1.820065000000 |

**Compound 5a,  $\omega$ B97X-D/Def2-SVP**

**Energy = -1011.274626 Eh**

**Imaginary frequency = 0**

|   |                 |                 |                 |
|---|-----------------|-----------------|-----------------|
| B | -0.770500000000 | 0.418024000000  | -0.236634000000 |
| C | 0.767641000000  | 0.414821000000  | -0.205001000000 |
| C | 1.990149000000  | 0.323444000000  | -0.166849000000 |
| N | -1.447579000000 | 1.640957000000  | -0.455929000000 |
| C | -0.767569000000 | 2.900017000000  | -0.706814000000 |
| H | -1.020427000000 | 3.252936000000  | -1.726967000000 |
| H | 0.316747000000  | 2.731118000000  | -0.682129000000 |
| C | -1.173747000000 | 3.971506000000  | 0.304071000000  |
| H | -0.668978000000 | 4.920776000000  | 0.063356000000  |
| H | -0.825327000000 | 3.662173000000  | 1.304430000000  |
| C | -2.691219000000 | 4.152260000000  | 0.319186000000  |
| H | -3.013530000000 | 4.575385000000  | -0.649518000000 |
| H | -2.992222000000 | 4.875716000000  | 1.093192000000  |
| C | -3.385028000000 | 2.807906000000  | 0.535615000000  |
| H | -4.478400000000 | 2.913793000000  | 0.452346000000  |
| H | -3.172228000000 | 2.447779000000  | 1.556238000000  |
| C | -2.894689000000 | 1.764395000000  | -0.468955000000 |
| H | -3.320873000000 | 0.775285000000  | -0.256483000000 |
| H | -3.228142000000 | 2.061129000000  | -1.484334000000 |
| N | -1.528769000000 | -0.842168000000 | -0.054631000000 |
| C | -1.590502000000 | -1.409979000000 | 1.306158000000  |
| C | -2.829957000000 | -2.318530000000 | 1.411633000000  |
| H | -2.830818000000 | -2.817412000000 | 2.394816000000  |
| H | -3.727422000000 | -1.676997000000 | 1.375011000000  |
| C | -2.917150000000 | -3.340989000000 | 0.286493000000  |
| H | -3.846102000000 | -3.925910000000 | 0.377779000000  |
| H | -2.092079000000 | -4.068504000000 | 0.363814000000  |
| C | -2.875067000000 | -2.632686000000 | -1.061094000000 |
| H | -3.774160000000 | -1.999393000000 | -1.155465000000 |
| H | -2.906645000000 | -3.362026000000 | -1.887317000000 |
| C | -1.638042000000 | -1.730764000000 | -1.229054000000 |
| C | -0.325573000000 | -2.188949000000 | 1.736673000000  |
| H | -0.367389000000 | -2.414101000000 | 2.814004000000  |
| H | 0.574941000000  | -1.588901000000 | 1.544369000000  |
| H | -0.215696000000 | -3.144940000000 | 1.210057000000  |
| C | -1.768891000000 | -0.255915000000 | 2.303615000000  |
| H | -1.898412000000 | -0.652944000000 | 3.321603000000  |
| H | -2.654928000000 | 0.343975000000  | 2.053886000000  |
| H | -0.890951000000 | 0.408838000000  | 2.313725000000  |
| C | -0.381807000000 | -2.595799000000 | -1.487103000000 |
| H | -0.252486000000 | -3.390940000000 | -0.742637000000 |
| H | 0.521083000000  | -1.968522000000 | -1.473252000000 |

|   |                 |                 |                 |
|---|-----------------|-----------------|-----------------|
| H | -0.450757000000 | -3.081554000000 | -2.473246000000 |
| C | -1.850006000000 | -0.869640000000 | -2.484050000000 |
| H | -0.966886000000 | -0.249533000000 | -2.703010000000 |
| H | -2.718903000000 | -0.207022000000 | -2.370648000000 |
| H | -2.024687000000 | -1.518182000000 | -3.355599000000 |
| N | 3.311784000000  | 0.186340000000  | -0.098295000000 |
| C | 4.176804000000  | 1.283574000000  | -0.517656000000 |
| H | 3.640274000000  | 2.225954000000  | -0.343116000000 |
| H | 4.375387000000  | 1.212464000000  | -1.606990000000 |
| C | 5.495076000000  | 1.251807000000  | 0.248413000000  |
| H | 5.296025000000  | 1.480901000000  | 1.308652000000  |
| H | 6.158642000000  | 2.041440000000  | -0.136744000000 |
| C | 6.161163000000  | -0.119634000000 | 0.137804000000  |
| H | 7.087542000000  | -0.146910000000 | 0.731609000000  |
| H | 6.454075000000  | -0.299546000000 | -0.912258000000 |
| C | 5.202179000000  | -1.220621000000 | 0.590274000000  |
| H | 5.654042000000  | -2.214953000000 | 0.451714000000  |
| H | 4.989160000000  | -1.105975000000 | 1.666212000000  |
| C | 3.888969000000  | -1.152267000000 | -0.181359000000 |
| H | 4.063895000000  | -1.421099000000 | -1.243479000000 |
| H | 3.154697000000  | -1.864062000000 | 0.219530000000  |

**Compound 7, ωB97X-D/Def2-SVP**

**Energy = -1547.654786 Eh**

**Imaginary frequency = 0**

|    |                |                 |                 |
|----|----------------|-----------------|-----------------|
| B  | 0.533893000000 | 0.003521000000  | -0.073946000000 |
| N  | 1.965538000000 | -0.024346000000 | -0.033696000000 |
| Si | 2.787596000000 | 1.477181000000  | -0.468547000000 |
| C  | 1.849595000000 | 2.313751000000  | -1.866783000000 |
| H  | 2.340492000000 | 3.261080000000  | -2.142041000000 |
| H  | 0.806890000000 | 2.533535000000  | -1.600039000000 |
| H  | 1.837445000000 | 1.665919000000  | -2.757730000000 |
| Si | 2.676901000000 | -1.550921000000 | 0.503109000000  |
| C  | 2.879301000000 | 2.612364000000  | 1.029262000000  |
| H  | 3.340957000000 | 3.580742000000  | 0.778161000000  |
| H  | 3.478058000000 | 2.147753000000  | 1.828764000000  |
| H  | 1.876498000000 | 2.807970000000  | 1.439221000000  |
| C  | 4.426858000000 | -1.311713000000 | 1.155587000000  |
| H  | 4.712195000000 | -2.210204000000 | 1.726479000000  |
| H  | 4.498623000000 | -0.449981000000 | 1.838169000000  |
| H  | 5.167500000000 | -1.181099000000 | 0.353964000000  |
| C  | 1.656661000000 | -2.244107000000 | 1.923148000000  |
| H  | 2.068356000000 | -3.210295000000 | 2.256565000000  |
| H  | 0.604675000000 | -2.398112000000 | 1.644603000000  |
| H  | 1.677376000000 | -1.551847000000 | 2.779959000000  |



|   |                 |                 |                 |
|---|-----------------|-----------------|-----------------|
| C | 2.726564000000  | -2.772551000000 | -0.925093000000 |
| H | 3.132119000000  | -3.747133000000 | -0.609473000000 |
| H | 3.359748000000  | -2.387347000000 | -1.740047000000 |
| H | 1.719408000000  | -2.939300000000 | -1.335371000000 |
| C | 4.533283000000  | 1.159908000000  | -1.099203000000 |
| H | 4.881404000000  | 2.057018000000  | -1.636402000000 |
| H | 4.564432000000  | 0.316799000000  | -1.807683000000 |
| H | 5.251351000000  | 0.959855000000  | -0.291549000000 |
| C | -0.781016000000 | 0.716978000000  | -0.038951000000 |
| N | -1.664321000000 | 1.752090000000  | 0.045931000000  |
| O | -3.489808000000 | 3.867268000000  | 0.229436000000  |
| C | -0.802551000000 | -0.649232000000 | -0.154273000000 |
| C | -1.196258000000 | 3.103794000000  | 0.282394000000  |
| H | -0.934831000000 | 3.612434000000  | -0.667942000000 |
| H | -0.295209000000 | 3.068726000000  | 0.909447000000  |
| C | -2.298678000000 | 3.894412000000  | 0.975229000000  |
| H | -2.468189000000 | 3.470441000000  | 1.985745000000  |
| H | -2.010831000000 | 4.949532000000  | 1.084107000000  |
| C | -3.956214000000 | 2.559145000000  | 0.021002000000  |
| H | -4.874235000000 | 2.635305000000  | -0.578937000000 |
| H | -4.210790000000 | 2.082457000000  | 0.990226000000  |
| C | -2.913952000000 | 1.711112000000  | -0.694307000000 |
| H | -3.252894000000 | 0.671295000000  | -0.795830000000 |
| H | -2.765663000000 | 2.108419000000  | -1.719182000000 |
| N | -1.737830000000 | -1.654255000000 | -0.244230000000 |
| O | -3.501014000000 | -3.833676000000 | -0.073644000000 |
| C | -2.841975000000 | -1.644434000000 | 0.703536000000  |
| H | -3.200520000000 | -0.615686000000 | 0.848748000000  |
| H | -2.506406000000 | -2.016213000000 | 1.694201000000  |
| C | -3.964025000000 | -2.535520000000 | 0.192227000000  |
| H | -4.761098000000 | -2.623410000000 | 0.944174000000  |
| H | -4.397121000000 | -2.086021000000 | -0.725173000000 |
| C | -2.458292000000 | -3.835969000000 | -1.015564000000 |
| H | -2.817569000000 | -3.436715000000 | -1.985700000000 |
| H | -2.156302000000 | -4.882660000000 | -1.160806000000 |
| C | -1.278722000000 | -2.999261000000 | -0.539887000000 |
| H | -0.826842000000 | -3.483082000000 | 0.350452000000  |
| H | -0.512043000000 | -2.950627000000 | -1.325521000000 |

### 3. References

- [50] G. M. Sheldrick, *Acta Cryst.* **2015**, *A71*, 3–8.
- [51] G. M. Sheldrick, *Acta Cryst.* **2008**, *A64*, 112–122.
- [52] M. J. Frisch, G. W. Trucks, H. B. Schlegel, G. E. Scuseria, M. A. Robb, J. R. Cheeseman, G. Scalmani, V. Barone, G. A. Petersson, H. Nakatsuji, X. Li, M. Caricato, A. V. Marenich, J. Bloino, B. G. Janesko, R. Gomperts, B. Mennucci, H. P. Hratchian, J. V. Ortiz, A. F. Izmaylov, J. L. Sonnenberg, Williams, F. Ding, F. Lipparini, F. Egidi, J. Goings, B. Peng, A. Petrone, T. Henderson, D. Ranasinghe, V. G. Zakrzewski, J. Gao, N. Rega, G. Zheng, W. Liang, M. Hada, M. Ehara, K. Toyota, R. Fukuda, J. Hasegawa, M. Ishida, T. Nakajima, Y. Honda, O. Kitao, H. Nakai, T. Vreven, K. Throssell, J. A. Montgomery Jr., J. E. Peralta, F. Ogliaro, M. J. Bearpark, J. J. Heyd, E. N. Brothers, K. N. Kudin, V. N. Staroverov, T. A. Keith, R. Kobayashi, J. Normand, K. Raghavachari, A. P. Rendell, J. C. Burant, S. S. Iyengar, J. Tomasi, M. Cossi, J. M. Millam, M. Klene, C. Adamo, R. Cammi, J. W. Ochterski, R. L. Martin, K. Morokuma, O. Farkas, J. B. Foresman and D. J. Fox, *Gaussian 16, Revision C.01*, **2016**.
- [53] J.-D. Chai, M. Head-Gordon, *Phys. Chem. Chem. Phys.* **2008**, *10*, 6615–6620.
- [54] A. E. Reed, L. A. Curtiss, F. Weinhold, *Chem. Rev.* **1988**, *88*, 899–926.
- [55] F. Weinhold, C. R. Landis, *Valency and Bonding: A Natural Bond Orbital Donor-Acceptor Perspective*, Cambridge University Press, Cambridge, **2005**.
- [56] E. D. Glendening, J. K. Badenhoop, A. E. Reed, J. E. Carpenter, J. A. Bohmann, C. M. Morales, P. Karafiloglou, C. R. Landis, F. Weinhold, *NBO 7.0*, Theoretical Chemistry Institute, University of Wisconsin, Madison, WI, USA, **2013**.
- [57] K. B. Wiberg, *Tetrahedron*, **1968**, *24*, 1083–1096.
- [58] T. Lu, F. Chen, *J. Comput. Chem.* **2012**, *33*, 580–592.
- [59] R. F. W. Bader, *Atoms in Molecules: A Quantum Theory*, Oxford University Press, Oxford, U. K., **1990**.
- [60] R. F. W. Bader, *J. Phys. Chem. A* **1998**, *102*, 7314–7323.
- [61] F. London, *J. Phys. Radium* **1937**, *8*, 397–409.
- [62] J. R. Cheeseman, G. W. Trucks, T. A. Keith, M. J. Frisch, *J. Chem. Phys.* **1996**, *104*, 5497–509.
- [63] G. A. Zhurko, D. A. Zhurko, *ChemCraft: Tool for treatment of chemical data*, **2005**.  
<https://www.chemcraftprog.com>.
